# Supplementary material for: Impact of P fertilizer and arbuscular mycorrhizal fungi on forage legume growth, chlorophyll content and productivity
Source: PeerJ. 2025 Jul 23;13:e18955. doi: 10.7717/peerj.18955 (PMC12296573; doi:10.7717/peerj.18955)
Supplement: Supplemental Information 1 [file peerj-13-18955-s001.xlsx]

## Sheet: Chlorophyll
	chlorophyll content 30 DAE										chlorophyll content 45 DAE						chlorophyll content 60 DAE						chlorophyll content 75 DAE						chlorophyll content 90 DAE			DAE stands for Days After Emergenece
																																AMF = arbuscular mycorrhizal fungi
Traetment	Replicate	Block	C.C	C.C	C.C	C.C	C.C			Traetment	Replicate	Block	30 cc			Traetment	Replicate	Block	C.C			Traetment	Replicate	Block	C.C			Traetment	Replicate	Block	C.C	R- means no rhizobium inoculation
Mucuna AMF- R-	1	1	54.3	51.8	53.1	42.3	42.6			Mucuna AMF- R-	1	1	54.3			Mucuna AMF- R-	1	1	53.1			Mucuna AMF- R-	1	1	42.3			Mucuna AMF- R-	1	1	42.6	R+ means rhizobium inoculation
Mucuna AMF- R-	1	1	54.8	51	54	42	42.5			Mucuna AMF- R-	2	1	54.8			Mucuna AMF- R-	1	1	54			Mucuna AMF- R-	1	1	42			Mucuna AMF- R-	1	1	42.5
Mucuna AMF- R-	1	1	54	51.3	53.8	42.7	42.4			Mucuna AMF- R-	3	1	54			Mucuna AMF- R-	1	1	53.8			Mucuna AMF- R-	1	1	42.7			Mucuna AMF- R-	1	1	42.4
Mucuna AMF- R-	2	1	46.2	47.2	43.4	37.8	43.5			Mucuna AMF- R-	4	1	55			Mucuna AMF- R-	2	1	43.4			Mucuna AMF- R-	2	1	37.8			Mucuna AMF- R-	2	1	43.5
Mucuna AMF- R-	2	1	46.3	47.3	42.8	37.2	43			Mucuna AMF- R-	5	1	54.7			Mucuna AMF- R-	2	1	42.8			Mucuna AMF- R-	2	1	37.2			Mucuna AMF- R-	2	1	43
Mucuna AMF- R-	2	1	46.2	47.9	43.5	37	43			Cowpea AMF+ R-	1	1	61			Mucuna AMF- R-	2	1	43.5			Mucuna AMF- R-	2	1	37			Mucuna AMF- R-	2	1	43
Mucuna AMF- R-	3	1	48.7	50.7	41.5	35.2	40.2			Cowpea AMF+ R-	2	1	61.4			Mucuna AMF- R-	3	1	41.5			Mucuna AMF- R-	3	1	35.2			Mucuna AMF- R-	3	1	40.2
Mucuna AMF- R-	3	1	48.3	50.3	40.9	35.6	40.3			Cowpea AMF+ R-	3	1	61.2			Mucuna AMF- R-	3	1	40.9			Mucuna AMF- R-	3	1	35.6			Mucuna AMF- R-	3	1	40.3
Mucuna AMF- R-	3	1	48.1	50.4	41.6	35.1	40.8			Cowpea AMF+ R-	4	1	61.4			Mucuna AMF- R-	3	1	41.6			Mucuna AMF- R-	3	1	35.1			Mucuna AMF- R-	3	1	40.8
Mucuna AMF- R-	4	1	51.8	51.6	49.9	34.6	44.3			Cowpea AMF+ R-	5	1	61.8			Mucuna AMF- R-	4	1	49.9			Mucuna AMF- R-	4	1	34.6			Mucuna AMF- R-	4	1	44.3
Mucuna AMF- R-	4	1	51.5	51.3	48.4	34.1	44.5			Lablab AMF- R+	1	1	49.4			Mucuna AMF- R-	4	1	48.4			Mucuna AMF- R-	4	1	34.1			Mucuna AMF- R-	4	1	44.5
Mucuna AMF- R-	4	1	51.4	51.7	48.6	34.7	44			Lablab AMF- R+	2	1	49.5			Mucuna AMF- R-	4	1	48.6			Mucuna AMF- R-	4	1	34.7			Mucuna AMF- R-	4	1	44
Mucuna AMF- R-	5	1	49.5	42.8	48.6	37.8	49.3			Lablab AMF- R+	3	1	49.1			Mucuna AMF- R-	5	1	48.6			Mucuna AMF- R-	5	1	37.8			Mucuna AMF- R-	5	1	49.3
Mucuna AMF- R-	5	1	49.3	42.3	49.3	37	48.9			Lablab AMF- R+	4	1	50.1			Mucuna AMF- R-	5	1	49.3			Mucuna AMF- R-	5	1	37			Mucuna AMF- R-	5	1	48.9
Mucuna AMF- R-	5	1	49.7	42.1	48.1	37.5	49.5			Lablab AMF- R+	5	1	49.4			Mucuna AMF- R-	5	1	48.1			Mucuna AMF- R-	5	1	37.5			Mucuna AMF- R-	5	1	49.5
Cowpea AMF+ R-	1	1	61.4	60.2	66.1	53.3	67.5			Mucuna AMF+ R-	1	1	57.2			Cowpea AMF+ R-	1	1	66.1			Cowpea AMF+ R-	1	1	53.3			Cowpea AMF+ R-	1	1	67.5
Cowpea AMF+ R-	1	1	61.2	60.3	66.8	53.2	67			Mucuna AMF+ R-	2	1	58.1			Cowpea AMF+ R-	1	1	66.8			Cowpea AMF+ R-	1	1	53.2			Cowpea AMF+ R-	1	1	67
Cowpea AMF+ R-	1	1	61.4	60.4	65.5	53.8	67.9			Mucuna AMF+ R-	3	1	57.6			Cowpea AMF+ R-	1	1	65.5			Cowpea AMF+ R-	1	1	53.8			Cowpea AMF+ R-	1	1	67.9
Cowpea AMF+ R-	2	1	66.4	60.8	66.7	60.9	66.3			Mucuna AMF+ R-	4	1	57.2			Cowpea AMF+ R-	2	1	66.7			Cowpea AMF+ R-	2	1	60.9			Cowpea AMF+ R-	2	1	66.3
Cowpea AMF+ R-	2	1	66.3	60	65.9	60.4	66.5			Mucuna AMF+ R-	5	1	57.3			Cowpea AMF+ R-	2	1	65.9			Cowpea AMF+ R-	2	1	60.4			Cowpea AMF+ R-	2	1	66.5
Cowpea AMF+ R-	2	1	66.7	60.3	66.3	60.8	66.4			Cowpea AMF- R+	1	1	62.2			Cowpea AMF+ R-	2	1	66.3			Cowpea AMF+ R-	2	1	60.8			Cowpea AMF+ R-	2	1	66.4
Cowpea AMF+ R-	3	1	60.3	73.2	72.6	62.1	63.5			Cowpea AMF- R+	2	1	62.7			Cowpea AMF+ R-	3	1	72.6			Cowpea AMF+ R-	3	1	62.1			Cowpea AMF+ R-	3	1	63.5
Cowpea AMF+ R-	3	1	60.4	73	71.3	62	63.2			Cowpea AMF- R+	3	1	62.4			Cowpea AMF+ R-	3	1	71.3			Cowpea AMF+ R-	3	1	62			Cowpea AMF+ R-	3	1	63.2
Cowpea AMF+ R-	3	1	61	73.2	71.8	62	63			Cowpea AMF- R+	4	1	63			Cowpea AMF+ R-	3	1	71.8			Cowpea AMF+ R-	3	1	62			Cowpea AMF+ R-	3	1	63
Cowpea AMF+ R-	4	1	73.2	61.2	57.2	45.3	60.3			Cowpea AMF- R+	5	1	63.2			Cowpea AMF+ R-	4	1	57.2			Cowpea AMF+ R-	4	1	45.3			Cowpea AMF+ R-	4	1	60.3
Cowpea AMF+ R-	4	1	73.4	62	56.6	44.9	60.2			Lablab AMF+ R-	1	1	52.2			Cowpea AMF+ R-	4	1	56.6			Cowpea AMF+ R-	4	1	44.9			Cowpea AMF+ R-	4	1	60.2
Cowpea AMF+ R-	4	1	73.1	61.5	56.9	45.1	60.5			Lablab AMF+ R-	2	1	52.4			Cowpea AMF+ R-	4	1	56.9			Cowpea AMF+ R-	4	1	45.1			Cowpea AMF+ R-	4	1	60.5
Cowpea AMF+ R-	5	1	57.2	63.6	65.2	55.3	62.2			Lablab AMF+ R-	3	1	52.7			Cowpea AMF+ R-	5	1	65.2			Cowpea AMF+ R-	5	1	55.3			Cowpea AMF+ R-	5	1	62.2
Cowpea AMF+ R-	5	1	57	63.4	66.1	55.7	62.3			Lablab AMF+ R-	4	1	53.1			Cowpea AMF+ R-	5	1	66.1			Cowpea AMF+ R-	5	1	55.7			Cowpea AMF+ R-	5	1	62.3
Cowpea AMF+ R-	5	1	57.4	63.5	65.9	55.1	63			Lablab AMF+ R-	5	1	52.9			Cowpea AMF+ R-	5	1	65.9			Cowpea AMF+ R-	5	1	55.1			Cowpea AMF+ R-	5	1	63
Lablab AMF- R+	1	1	49.4	40.3	47.2	33.3	37.1			Mucuna AMF- R+	1	1	49.3			Lablab AMF- R+	1	1	47.2			Lablab AMF- R+	1	1	33.3			Lablab AMF- R+	1	1	37.1
Lablab AMF- R+	1	1	49.5	40.8	46.8	33.2	37.6			Mucuna AMF- R+	2	1	48.3			Lablab AMF- R+	1	1	46.8			Lablab AMF- R+	1	1	33.2			Lablab AMF- R+	1	1	37.6
Lablab AMF- R+	1	1	49.1	40.5	47.3	33.5	37.2			Mucuna AMF- R+	3	1	48			Lablab AMF- R+	1	1	47.3			Lablab AMF- R+	1	1	33.5			Lablab AMF- R+	1	1	37.2
Lablab AMF- R+	2	1	46.4	41.8	34.5	43.9	38.5			Mucuna AMF- R+	4	1	49.2			Lablab AMF- R+	2	1	34.5			Lablab AMF- R+	2	1	43.9			Lablab AMF- R+	2	1	38.5
Lablab AMF- R+	2	1	46.1	41.7	33.8	43.7	39.5			Mucuna AMF- R+	5	1	49			Lablab AMF- R+	2	1	33.8			Lablab AMF- R+	2	1	43.7			Lablab AMF- R+	2	1	39.5
Lablab AMF- R+	2	1	46.7	41.3	34.6	43.1	38			Cowpea AMF+ R+	1	1	53.3			Lablab AMF- R+	2	1	34.6			Lablab AMF- R+	2	1	43.1			Lablab AMF- R+	2	1	38
Lablab AMF- R+	3	1	50.6	43.1	42.9	44.8	43.4			Cowpea AMF+ R+	2	1	53			Lablab AMF- R+	3	1	42.9			Lablab AMF- R+	3	1	44.8			Lablab AMF- R+	3	1	43.4
Lablab AMF- R+	3	1	50	43.2	41.7	44.1	42.6			Cowpea AMF+ R+	3	1	53.4			Lablab AMF- R+	3	1	41.7			Lablab AMF- R+	3	1	44.1			Lablab AMF- R+	3	1	42.6
Lablab AMF- R+	3	1	51	43	41.5	44.5	42.4			Cowpea AMF+ R+	4	1	53.8			Lablab AMF- R+	3	1	41.5			Lablab AMF- R+	3	1	44.5			Lablab AMF- R+	3	1	42.4
Lablab AMF- R+	4	1	42.9	42.7	45.3	36.2	43.3			Cowpea AMF+ R+	5	1	52.2			Lablab AMF- R+	4	1	45.3			Lablab AMF- R+	4	1	36.2			Lablab AMF- R+	4	1	43.3
Lablab AMF- R+	4	1	42.6	42	45.4	36.8	42.6			Lablab AMF- R-	1	1	52.1			Lablab AMF- R+	4	1	45.4			Lablab AMF- R+	4	1	36.8			Lablab AMF- R+	4	1	42.6
Lablab AMF- R+	4	1	42.1	42.3	46.8	36.5	42.3			Lablab AMF- R-	2	1	52.4			Lablab AMF- R+	4	1	46.8			Lablab AMF- R+	4	1	36.5			Lablab AMF- R+	4	1	42.3
Lablab AMF- R+	5	1	42.8	45.2	43.8	37.3	36.2			Lablab AMF- R-	3	1	52.7			Lablab AMF- R+	5	1	43.8			Lablab AMF- R+	5	1	37.3			Lablab AMF- R+	5	1	36.2
Lablab AMF- R+	5	1	42	45.1	43.6	37.1	37.2			Lablab AMF- R-	4	1	52.8			Lablab AMF- R+	5	1	43.6			Lablab AMF- R+	5	1	37.1			Lablab AMF- R+	5	1	37.2
Lablab AMF- R+	5	1	42.7	46	44.2	37.9	36.7			Lablab AMF- R-	5	1	53.1			Lablab AMF- R+	5	1	44.2			Lablab AMF- R+	5	1	37.9			Lablab AMF- R+	5	1	36.7
	1	1	57.2	59.2	49.9	37.4	34.6			Mucuna AMF+ R+	1	1	57.2			Mucuna AMF+ R-	1	1	49.9			Mucuna AMF+ R-	1	1	37.4			Mucuna AMF+ R-	1	1	34.6
Mucuna AMF+ R-	1	1	58.1	59.1	50.1	37.2	35.9			Mucuna AMF+ R+	2	1	58.1			Mucuna AMF+ R-	1	1	50.1			Mucuna AMF+ R-	1	1	37.2			Mucuna AMF+ R-	1	1	35.9
Mucuna AMF+ R-	1	1	57.6	59.4	50.8	37.4	35.2			Mucuna AMF+ R+	3	1	57.6			Mucuna AMF+ R-	1	1	50.8			Mucuna AMF+ R-	1	1	37.4			Mucuna AMF+ R-	1	1	35.2
Mucuna AMF+ R-	2	1	40.3	47.3	43.2	50.8	44.9			Mucuna AMF+ R+	4	1	58			Mucuna AMF+ R-	2	1	43.2			Mucuna AMF+ R-	2	1	50.8			Mucuna AMF+ R-	2	1	44.9
Mucuna AMF+ R-	2	1	40.7	47.5	43.6	50.1	43.5			Mucuna AMF+ R+	5	1	57.4			Mucuna AMF+ R-	2	1	43.6			Mucuna AMF+ R-	2	1	50.1			Mucuna AMF+ R-	2	1	43.5
Mucuna AMF+ R-	2	1	40.6	47.1	44.1	50.5	44.5			Cowpea AMF- R-	1	1	65.2			Mucuna AMF+ R-	2	1	44.1			Mucuna AMF+ R-	2	1	50.5			Mucuna AMF+ R-	2	1	44.5
Mucuna AMF+ R-	3	1	47.7	57.1	36.5	47.9	40.7			Cowpea AMF- R-	2	1	64.7			Mucuna AMF+ R-	3	1	36.5			Mucuna AMF+ R-	3	1	47.9			Mucuna AMF+ R-	3	1	40.7
Mucuna AMF+ R-	3	1	47.1	57.3	37.1	47.2	41.8			Cowpea AMF- R-	3	1	64.8			Mucuna AMF+ R-	3	1	37.1			Mucuna AMF+ R-	3	1	47.2			Mucuna AMF+ R-	3	1	41.8
Mucuna AMF+ R-	3	1	47.9	57.9	36.8	47.3	44.9			Cowpea AMF- R-	4	1	65			Mucuna AMF+ R-	3	1	36.8			Mucuna AMF+ R-	3	1	47.3			Mucuna AMF+ R-	3	1	44.9
Mucuna AMF+ R-	4	1	42.6	59.2	47.3	35.3	47.7			Cowpea AMF- R-	5	1	64.7			Mucuna AMF+ R-	4	1	47.3			Mucuna AMF+ R-	4	1	35.3			Mucuna AMF+ R-	4	1	47.7
Mucuna AMF+ R-	4	1	42.1	59.1	47.5	35.1	47.7			Lablab AMF+ R+	1	1				Mucuna AMF+ R-	4	1	47.5			Mucuna AMF+ R-	4	1	35.1			Mucuna AMF+ R-	4	1	47.7
Mucuna AMF+ R-	4	1	42.8	59.5	48.5	35.8	46.6			Lablab AMF+ R+	2	1				Mucuna AMF+ R-	4	1	48.5			Mucuna AMF+ R-	4	1	35.8			Mucuna AMF+ R-	4	1	46.6
Mucuna AMF+ R-	5	1	43	53.8	37.1	47.8	34.4			Lablab AMF+ R+	3	1				Mucuna AMF+ R-	5	1	37.1			Mucuna AMF+ R-	5	1	47.8			Mucuna AMF+ R-	5	1	34.4
Mucuna AMF+ R-	5	1	43.2	53.4	36.8	47.2	33.7			Lablab AMF+ R+	4	1				Mucuna AMF+ R-	5	1	36.8			Mucuna AMF+ R-	5	1	47.2			Mucuna AMF+ R-	5	1	33.7
Mucuna AMF+ R-	5	1	43.7	53	36.9	47.6	34.4			Lablab AMF+ R+	5	1				Mucuna AMF+ R-	5	1	36.9			Mucuna AMF+ R-	5	1	47.6			Mucuna AMF+ R-	5	1	34.4
Cowpea AMF- R+	1	1	62.2	67.5	78.6	57.7	63.5			Lablab AMF+ R+	1	2				Cowpea AMF- R+	1	1	78.6			Cowpea AMF- R+	1	1	57.7			Cowpea AMF- R+	1	1	63.5
Cowpea AMF- R+	1	1	62.7	67	77.3	57.7	64.7			Lablab AMF+ R+	2	2				Cowpea AMF- R+	1	1	77.3			Cowpea AMF- R+	1	1	57.7			Cowpea AMF- R+	1	1	64.7
Cowpea AMF- R+	1	1	62.4	67.1	78.9	57.2	64.4			Lablab AMF+ R+	3	2				Cowpea AMF- R+	1	1	78.9			Cowpea AMF- R+	1	1	57.2			Cowpea AMF- R+	1	1	64.4
Cowpea AMF- R+	2	1	60.3	66.3	60.7	55.2	59.1			Lablab AMF+ R+	4	2				Cowpea AMF- R+	2	1	60.7			Cowpea AMF- R+	2	1	55.2			Cowpea AMF- R+	2	1	59.1
Cowpea AMF- R+	2	1	60.7	66.9	61.2	55.6	59.6			Lablab AMF+ R+	5	2				Cowpea AMF- R+	2	1	61.2			Cowpea AMF- R+	2	1	55.6			Cowpea AMF- R+	2	1	59.6
Cowpea AMF- R+	2	1	60.1	66.5	60.8	55.1	61.3			Mucuna AMF- R-	1	2				Cowpea AMF- R+	2	1	60.8			Cowpea AMF- R+	2	1	55.1			Cowpea AMF- R+	2	1	61.3
Cowpea AMF- R+	3	1	67.1	62.5	57.7	51.3	66.3			Mucuna AMF- R-	2	2				Cowpea AMF- R+	3	1	57.7			Cowpea AMF- R+	3	1	51.3			Cowpea AMF- R+	3	1	66.3
Cowpea AMF- R+	3	1	67.3	61	58.2	51.7	67.2			Mucuna AMF- R-	3	2				Cowpea AMF- R+	3	1	58.2			Cowpea AMF- R+	3	1	51.7			Cowpea AMF- R+	3	1	67.2
Cowpea AMF- R+	3	1	67.1	62.1	58.3	51.2	66.6			Mucuna AMF- R-	4	2				Cowpea AMF- R+	3	1	58.3			Cowpea AMF- R+	3	1	51.2			Cowpea AMF- R+	3	1	66.6
Cowpea AMF- R+	4	1	63.1	60.7	59.9	54.7	59.2			Mucuna AMF- R-	5	2				Cowpea AMF- R+	4	1	59.9			Cowpea AMF- R+	4	1	54.7			Cowpea AMF- R+	4	1	59.2
Cowpea AMF- R+	4	1	62.8	60	60.4	54.2	59.8			Cowpea AMF+ R+	1	2				Cowpea AMF- R+	4	1	60.4			Cowpea AMF- R+	4	1	54.2			Cowpea AMF- R+	4	1	59.8
Cowpea AMF- R+	4	1	63	60.8	60.1	54.3	60.3			Cowpea AMF+ R+	2	2				Cowpea AMF- R+	4	1	60.1			Cowpea AMF- R+	4	1	54.3			Cowpea AMF- R+	4	1	60.3
Cowpea AMF- R+	5	1	56.3	59.9	60.4	48.4	65.7			Cowpea AMF+ R+	3	2				Cowpea AMF- R+	5	1	60.4			Cowpea AMF- R+	5	1	48.4			Cowpea AMF- R+	5	1	65.7
Cowpea AMF- R+	5	1	55.8	60	61.2	48.2	65.9			Cowpea AMF+ R+	4	2				Cowpea AMF- R+	5	1	61.2			Cowpea AMF- R+	5	1	48.2			Cowpea AMF- R+	5	1	65.9
Cowpea AMF- R+	5	1	55.9	60.1	60	48.6	66.8			Cowpea AMF+ R+	5	2				Cowpea AMF- R+	5	1	60			Cowpea AMF- R+	5	1	48.6			Cowpea AMF- R+	5	1	66.8
	1	1	52.2	51.1	54.5	34.2	46.9			Lablab AMF- R-	1	2				Lablab AMF+ R-	1	1	54.5			Lablab AMF+ R-	1	1	34.2			Lablab AMF+ R-	1	1	46.9
Lablab AMF+ R-	1	1	52.4	51.2	53.7	34.5	45.5			Lablab AMF- R-	2	2				Lablab AMF+ R-	1	1	53.7			Lablab AMF+ R-	1	1	34.5			Lablab AMF+ R-	1	1	45.5
Lablab AMF+ R-	1	1	52.7	51.4	53.5	34.8	45.6			Lablab AMF- R-	3	2				Lablab AMF+ R-	1	1	53.5			Lablab AMF+ R-	1	1	34.8			Lablab AMF+ R-	1	1	45.6
Lablab AMF+ R-	2	1	56.1	48.1	44.2	45	45.8			Lablab AMF- R-	4	2				Lablab AMF+ R-	2	1	44.2			Lablab AMF+ R-	2	1	45			Lablab AMF+ R-	2	1	45.8
Lablab AMF+ R-	2	1	56.4	48.3	43.8	45	45.5			Lablab AMF- R-	5	2				Lablab AMF+ R-	2	1	43.8			Lablab AMF+ R-	2	1	45			Lablab AMF+ R-	2	1	45.5
Lablab AMF+ R-	2	1	56.1	48	44.3	45.6	46.9			Mucuna AMF+ R+	1	2				Lablab AMF+ R-	2	1	44.3			Lablab AMF+ R-	2	1	45.6			Lablab AMF+ R-	2	1	46.9
Lablab AMF+ R-	3	1	53.2	46.9	45.3	47.3	45.8			Mucuna AMF+ R+	2	2				Lablab AMF+ R-	3	1	45.3			Lablab AMF+ R-	3	1	47.3			Lablab AMF+ R-	3	1	45.8
Lablab AMF+ R-	3	1	53.7	47.2	44.5	47.5	45.3			Mucuna AMF+ R+	3	2				Lablab AMF+ R-	3	1	44.5			Lablab AMF+ R-	3	1	47.5			Lablab AMF+ R-	3	1	45.3
Lablab AMF+ R-	3	1	53.1	46.2	45.2	47.1	46.4			Mucuna AMF+ R+	4	2				Lablab AMF+ R-	3	1	45.2			Lablab AMF+ R-	3	1	47.1			Lablab AMF+ R-	3	1	46.4
Lablab AMF+ R-	4	1	52.4	47.4	46.7	47.1	45			Mucuna AMF+ R+	5	2				Lablab AMF+ R-	4	1	46.7			Lablab AMF+ R-	4	1	47.1			Lablab AMF+ R-	4	1	45
Lablab AMF+ R-	4	1	52.4	47.2	45.3	47.4	46.7			Cowpea AMF- R-	1	2				Lablab AMF+ R-	4	1	45.3			Lablab AMF+ R-	4	1	47.4			Lablab AMF+ R-	4	1	46.7
Lablab AMF+ R-	4	1	52.7	47.6	46.7	47.6	45.5			Cowpea AMF- R-	2	2				Lablab AMF+ R-	4	1	46.7			Lablab AMF+ R-	4	1	47.6			Lablab AMF+ R-	4	1	45.5
Lablab AMF+ R-	5	1	52.5	45.4	52.9	37.3	56.8			Cowpea AMF- R-	3	2				Lablab AMF+ R-	5	1	52.9			Lablab AMF+ R-	5	1	37.3			Lablab AMF+ R-	5	1	56.8
Lablab AMF+ R-	5	1	52.1	45.2	51.7	37.1	57			Cowpea AMF- R-	4	2				Lablab AMF+ R-	5	1	51.7			Lablab AMF+ R-	5	1	3.1			Lablab AMF+ R-	5	1	57
Lablab AMF+ R-	5	1	52.8	45.9	52.8	37.8	57.2			Cowpea AMF- R-	5	2				Lablab AMF+ R-	5	1	52.8			Lablab AMF+ R-	5	1	37.8			Lablab AMF+ R-	5	1	57.2
	1	1	49.3	47	41.5	38.6	51.5			Lablab AMF+ R-	1	2				Mucuna AMF- R+	1	1	41.5			Mucuna AMF- R+	1	1	38.6			Mucuna AMF- R+	1	1	51.5
Mucuna AMF- R+	1	1	48.3	47.3	40.8	38.2	50.7			Lablab AMF+ R-	2	2				Mucuna AMF- R+	1	1	40.8			Mucuna AMF- R+	1	1	38.2			Mucuna AMF- R+	1	1	50.7
Mucuna AMF- R+	1	1	48	47.1	41	38.1	51.7			Lablab AMF+ R-	3	2				Mucuna AMF- R+	1	1	41			Mucuna AMF- R+	1	1	38.1			Mucuna AMF- R+	1	1	51.7
Mucuna AMF- R+	2	1	45.8	53.8	54.7	44.8	50.5			Lablab AMF+ R-	4	2				Mucuna AMF- R+	2	1	54.7			Mucuna AMF- R+	2	1	44.8			Mucuna AMF- R+	2	1	50.5
Mucuna AMF- R+	2	1	45.1	53.2	54.3	44.2	50.7			Lablab AMF+ R-	5	2				Mucuna AMF- R+	2	1	54.3			Mucuna AMF- R+	2	1	44.2			Mucuna AMF- R+	2	1	50.7
Mucuna AMF- R+	2	1	45.9	53.1	55.3	44.1	51.9			Mucuna AMF- R+	1	2				Mucuna AMF- R+	2	1	55.3			Mucuna AMF- R+	2	1	44.1			Mucuna AMF- R+	2	1	51.9
Mucuna AMF- R+	3	1	46.9	50.3	52.5	40.1	55.6			Mucuna AMF- R+	2	2				Mucuna AMF- R+	3	1	52.5			Mucuna AMF- R+	3	1	40.1			Mucuna AMF- R+	3	1	55.6
Mucuna AMF- R+	3	1	46.1	50.4	53.1	40.5	58.6			Mucuna AMF- R+	3	2				Mucuna AMF- R+	3	1	53.1			Mucuna AMF- R+	3	1	40.5			Mucuna AMF- R+	3	1	58.6
Mucuna AMF- R+	3	1	45.7	50.9	52.8	40.7	56.2			Mucuna AMF- R+	4	2				Mucuna AMF- R+	3	1	52.8			Mucuna AMF- R+	3	1	40.7			Mucuna AMF- R+	3	1	56.2
Mucuna AMF- R+	4	1	48.3	44.3	52	44.3	45.3			Mucuna AMF- R+	5	2				Mucuna AMF- R+	4	1	52			Mucuna AMF- R+	4	1	44.3			Mucuna AMF- R+	4	1	45.3
Mucuna AMF- R+	4	1	49	44.1	53.4	44.3	44.8			Cowpea AMF+ R-	1	2				Mucuna AMF- R+	4	1	53.4			Mucuna AMF- R+	4	1	44.3			Mucuna AMF- R+	4	1	44.8
Mucuna AMF- R+	4	1	48.7	44.8	52.6	44.2	45.7			Cowpea AMF+ R-	2	2				Mucuna AMF- R+	4	1	52.6			Mucuna AMF- R+	4	1	44.2			Mucuna AMF- R+	4	1	45.7
Mucuna AMF- R+	5	1	47.3	49.4	56.5	40.3	43.8			Cowpea AMF+ R-	3	2				Mucuna AMF- R+	5	1	56.5			Mucuna AMF- R+	5	1	40.3			Mucuna AMF- R+	5	1	43.8
Mucuna AMF- R+	5	1	47.2	49.2	56.3	40.5	42.5			Cowpea AMF+ R-	4	2				Mucuna AMF- R+	5	1	56.3			Mucuna AMF- R+	5	1	40.5			Mucuna AMF- R+	5	1	42.5
Mucuna AMF- R+	5	1	47.7	49.1	55.9	40.7	42.8			Cowpea AMF+ R-	5	2				Mucuna AMF- R+	5	1	55.9			Mucuna AMF- R+	5	1	40.7			Mucuna AMF- R+	5	1	42.8
	1	1	53.3	67.5	58.8	49.5	66.1			Lablab AMF- R+	1	2				Cowpea AMF+ R+	1	1	58.8			Cowpea AMF+ R+	1	1	49.5			Cowpea AMF+ R+	1	1	66.1
Cowpea AMF+ R+	1	1	53	67.6	58	49.2	66.5			Lablab AMF- R+	2	2				Cowpea AMF+ R+	1	1	58			Cowpea AMF+ R+	1	1	49.2			Cowpea AMF+ R+	1	1	66.5
Cowpea AMF+ R+	1	1	53.4	66.8	58.2	49.3	65.9			Lablab AMF- R+	3	2				Cowpea AMF+ R+	1	1	58.2			Cowpea AMF+ R+	1	1	49.3			Cowpea AMF+ R+	1	1	65.9
Cowpea AMF+ R+	2	1	62	69.4	59.9	55.7	65			Lablab AMF- R+	4	2				Cowpea AMF+ R+	2	1	59.9			Cowpea AMF+ R+	2	1	55.7			Cowpea AMF+ R+	2	1	65
Cowpea AMF+ R+	2	1	62.1	69.2	60.2	55.4	64.5			Lablab AMF- R+	5	2				Cowpea AMF+ R+	2	1	60.2			Cowpea AMF+ R+	2	1	55.4			Cowpea AMF+ R+	2	1	64.5
Cowpea AMF+ R+	2	1	62.4	69.4	60.1	55.2	64.8			Mucuna AMF+ R-	1	2				Cowpea AMF+ R+	2	1	60.1			Cowpea AMF+ R+	2	1	55.2			Cowpea AMF+ R+	2	1	64.8
Cowpea AMF+ R+	3	1	63.7	67.4	54.2	58.7	60.1			Mucuna AMF+ R-	2	2				Cowpea AMF+ R+	3	1	54.2			Cowpea AMF+ R+	3	1	58.7			Cowpea AMF+ R+	3	1	60.1
Cowpea AMF+ R+	3	1	63.3	67.9	55.1	58.2	60.4			Mucuna AMF+ R-	3	2				Cowpea AMF+ R+	3	1	55.1			Cowpea AMF+ R+	3	1	58.2			Cowpea AMF+ R+	3	1	60.4
Cowpea AMF+ R+	3	1	63.1	67.8	54.8	58.1	59.8			Mucuna AMF+ R-	4	2				Cowpea AMF+ R+	3	1	54.8			Cowpea AMF+ R+	3	1	58.1			Cowpea AMF+ R+	3	1	59.8
Cowpea AMF+ R+	4	1	59.6	60.8	55.9	49.7	54.6			Mucuna AMF+ R-	5	2				Cowpea AMF+ R+	4	1	55.9			Cowpea AMF+ R+	4	1	49.7			Cowpea AMF+ R+	4	1	54.6
Cowpea AMF+ R+	4	1	59.4	60.4	58.7	49.2	55.3			Cowpea AMF- R+	1	2				Cowpea AMF+ R+	4	1	58.7			Cowpea AMF+ R+	4	1	49.2			Cowpea AMF+ R+	4	1	55.3
Cowpea AMF+ R+	4	1	59.1	60.4	58.6	49.6	54.6			Cowpea AMF- R+	2	2				Cowpea AMF+ R+	4	1	58.6			Cowpea AMF+ R+	4	1	49.6			Cowpea AMF+ R+	4	1	54.6
Cowpea AMF+ R+	5	1	53.2	64.5	62.2	58.2	67.1			Cowpea AMF- R+	3	2				Cowpea AMF+ R+	5	1	62.2			Cowpea AMF+ R+	5	1	58.2			Cowpea AMF+ R+	5	1	67.1
Cowpea AMF+ R+	5	1	53.4	64.2	62	58.4	66.3			Cowpea AMF- R+	4	2				Cowpea AMF+ R+	5	1	62			Cowpea AMF+ R+	5	1	58.4			Cowpea AMF+ R+	5	1	66.3
Cowpea AMF+ R+	5	1	53.7	64.8	63.1	58.6	66.9			Cowpea AMF- R+	5	2				Cowpea AMF+ R+	5	1	63.1			Cowpea AMF+ R+	5	1	58.6			Cowpea AMF+ R+	5	1	66.9
	1	1	52.1	46.3	44.1	36.9	44.3			Cowpea AMF- R-	1	3				Lablab AMF- R-	1	1	44.1			Lablab AMF- R-	1	1	36.9			Lablab AMF- R-	1	1	44.3
Lablab AMF- R-	1	1	52.4	45.9	43.9	36.9	45.6			Cowpea AMF- R-	2	3				Lablab AMF- R-	1	1	43.9			Lablab AMF- R-	1	1	36.9			Lablab AMF- R-	1	1	45.6
Lablab AMF- R-	1	1	52.7	46.5	43.1	36.8	43			Cowpea AMF- R-	3	3				Lablab AMF- R-	1	1	43.1			Lablab AMF- R-	1	1	36.8			Lablab AMF- R-	1	1	43
Lablab AMF- R-	2	1	50.8	45.3	46.5	43.3	48.7			Cowpea AMF- R-	4	3				Lablab AMF- R-	2	1	46.5			Lablab AMF- R-	2	1	43.3			Lablab AMF- R-	2	1	48.7
Lablab AMF- R-	2	1	50.4	45.6	47.1	43.7	47.9			Cowpea AMF- R-	5	3				Lablab AMF- R-	2	1	47.1			Lablab AMF- R-	2	1	43.7			Lablab AMF- R-	2	1	47.9
Lablab AMF- R-	2	1	50.3	45.1	47.3	43.2	48			Lablab AMF+ R+	1	3				Lablab AMF- R-	2	1	47.3			Lablab AMF- R-	2	1	43.2			Lablab AMF- R-	2	1	48
Lablab AMF- R-	3	1	51.2	44.3	48.2	45.2	43			Lablab AMF+ R+	2	3				Lablab AMF- R-	3	1	48.2			Lablab AMF- R-	3	1	45.2			Lablab AMF- R-	3	1	43
Lablab AMF- R-	3	1	52.3	44.2	48.3	45	42.8			Lablab AMF+ R+	3	3				Lablab AMF- R-	3	1	48.3			Lablab AMF- R-	3	1	45			Lablab AMF- R-	3	1	42.8
Lablab AMF- R-	3	1	51.2	44.7	47.5	45.5	43.2			Lablab AMF+ R+	4	3				Lablab AMF- R-	3	1	47.5			Lablab AMF- R-	3	1	45.5			Lablab AMF- R-	3	1	43.2
Lablab AMF- R-	4	1	61.7	47.6	53.1	50.7	41.8			Lablab AMF+ R+	5	3				Lablab AMF- R-	4	1	53.1			Lablab AMF- R-	4	1	50.7			Lablab AMF- R-	4	1	41.8
Lablab AMF- R-	4	1	61.2	47.1	52.8	50.2	41.6			Mucuna AMF- R-	1	3				Lablab AMF- R-	4	1	52.8			Lablab AMF- R-	4	1	50.2			Lablab AMF- R-	4	1	41.6
Lablab AMF- R-	4	1	61.4	47.5	52.9	50.4	42.7			Mucuna AMF- R-	2	3				Lablab AMF- R-	4	1	52.9			Lablab AMF- R-	4	1	50.4			Lablab AMF- R-	4	1	42.7
Lablab AMF- R-	5	1	51.4	51.3	59.1	39.4	44.7			Mucuna AMF- R-	3	3				Lablab AMF- R-	5	1	59.1			Lablab AMF- R-	5	1	39.4			Lablab AMF- R-	5	1	44.7
Lablab AMF- R-	5	1	51.3	51.7	58.4	38.9	44.9			Mucuna AMF- R-	4	3				Lablab AMF- R-	5	1	58.4			Lablab AMF- R-	5	1	38.9			Lablab AMF- R-	5	1	44.9
Lablab AMF- R-	5	1	51.7	51.3	59.6	39	45.3			Mucuna AMF- R-	5	3				Lablab AMF- R-	5	1	59.6			Lablab AMF- R-	5	1	39			Lablab AMF- R-	5	1	45.3
	1	1	51.4	50.4	43.7	50.4	48.5			Cowpea AMF+ R-	1	3				Mucuna AMF+ R+	1	1	43.7			Mucuna AMF+ R+	1	1	50.4			Mucuna AMF+ R+	1	1	48.5
Mucuna AMF+ R+	1	1	51	50	42.7	50.7	47.5			Cowpea AMF+ R-	2	3				Mucuna AMF+ R+	1	1	42.7			Mucuna AMF+ R+	1	1	50.7			Mucuna AMF+ R+	1	1	47.5
Mucuna AMF+ R+	1	1	51.7	50.7	43.1	50.1	47.9			Cowpea AMF+ R-	3	3				Mucuna AMF+ R+	1	1	43.1			Mucuna AMF+ R+	1	1	50.1			Mucuna AMF+ R+	1	1	47.9
Mucuna AMF+ R+	2	1	42.6	43.9	44.9	46	48.9			Cowpea AMF+ R-	4	3				Mucuna AMF+ R+	2	1	44.9			Mucuna AMF+ R+	2	1	46			Mucuna AMF+ R+	2	1	48.9
Mucuna AMF+ R+	2	1	42.1	43.5	44.5	46.3	48.2			Cowpea AMF+ R-	5	3				Mucuna AMF+ R+	2	1	44.5			Mucuna AMF+ R+	2	1	46.3			Mucuna AMF+ R+	2	1	48.2
Mucuna AMF+ R+	2	1	42.3	43.7	45.6	46.9	49.9			Lablab AMF- R+	1	3				Mucuna AMF+ R+	2	1	45.6			Mucuna AMF+ R+	2	1	46.9			Mucuna AMF+ R+	2	1	49.9
Mucuna AMF+ R+	3	1	44.7	44.6	50.1	38.6	42.9			Lablab AMF- R+	2	3				Mucuna AMF+ R+	3	1	50.1			Mucuna AMF+ R+	3	1	38.6			Mucuna AMF+ R+	3	1	42.9
Mucuna AMF+ R+	3	1	44	44	51.4	38	43.9			Lablab AMF- R+	3	3				Mucuna AMF+ R+	3	1	51.4			Mucuna AMF+ R+	3	1	38			Mucuna AMF+ R+	3	1	43.9
Mucuna AMF+ R+	3	1	44.3	44.1	50.9	38	42.7			Lablab AMF- R+	4	3				Mucuna AMF+ R+	3	1	50.9			Mucuna AMF+ R+	3	1	38			Mucuna AMF+ R+	3	1	42.7
Mucuna AMF+ R+	4	1	46.5	45.1	52.1	38.9	47.6			Lablab AMF- R+	5	3				Mucuna AMF+ R+	4	1	52.1			Mucuna AMF+ R+	4	1	38.9			Mucuna AMF+ R+	4	1	47.6
Mucuna AMF+ R+	4	1	46.2	45.1	52.6	38.1	46.5			Mucuna AMF+ R-	1	3				Mucuna AMF+ R+	4	1	52.6			Mucuna AMF+ R+	4	1	38.1			Mucuna AMF+ R+	4	1	46.5
Mucuna AMF+ R+	4	1	46	45.2	51.4	38.5	47.9			Mucuna AMF+ R-	2	3				Mucuna AMF+ R+	4	1	51.4			Mucuna AMF+ R+	4	1	38.5			Mucuna AMF+ R+	4	1	47.9
Mucuna AMF+ R+	5	1	44.1	55.2	47.2	45	47.9			Mucuna AMF+ R-	3	3				Mucuna AMF+ R+	5	1	47.2			Mucuna AMF+ R+	5	1	45			Mucuna AMF+ R+	5	1	47.9
Mucuna AMF+ R+	5	1	44.3	55.7	46.3	45.2	48.2			Mucuna AMF+ R-	4	3				Mucuna AMF+ R+	5	1	46.3			Mucuna AMF+ R+	5	1	45.2			Mucuna AMF+ R+	5	1	48.2
Mucuna AMF+ R+	5	1	44.8	55.1	46	45	46.8			Mucuna AMF+ R-	5	3				Mucuna AMF+ R+	5	1	46			Mucuna AMF+ R+	5	1	45			Mucuna AMF+ R+	5	1	46.8
	1	1	65.2	61.2	70.5	59	68.2			Cowpea AMF- R+	1	3				Cowpea AMF- R-	1	1	70.5			Cowpea AMF- R-	1	1	59			Cowpea AMF- R-	1	1	68.2
Cowpea AMF- R-	1	1	64.7	61.2	69.3	59.3	67.8			Cowpea AMF- R+	2	3				Cowpea AMF- R-	1	1	69.3			Cowpea AMF- R-	1	1	59.3			Cowpea AMF- R-	1	1	67.8
Cowpea AMF- R-	1	1	64.8	61.7	70	59.7	68			Cowpea AMF- R+	3	3				Cowpea AMF- R-	1	1	70			Cowpea AMF- R-	1	1	59.7			Cowpea AMF- R-	1	1	68
Cowpea AMF- R-	2	1	63.4	62.8	60.5	55.5	64.7			Cowpea AMF- R+	4	3				Cowpea AMF- R-	2	1	60.5			Cowpea AMF- R-	2	1	55.5			Cowpea AMF- R-	2	1	64.7
Cowpea AMF- R-	2	1	63.1	62.7	61.4	55.4	65.1			Cowpea AMF- R+	5	3				Cowpea AMF- R-	2	1	61.4			Cowpea AMF- R-	2	1	55.4			Cowpea AMF- R-	2	1	65.1
Cowpea AMF- R-	2	1	63.7	62	61.7	55.9	64.2			Lablab AMF+ R-	1	3				Cowpea AMF- R-	2	1	61.7			Cowpea AMF- R-	2	1	55.9			Cowpea AMF- R-	2	1	64.2
Cowpea AMF- R-	3	1	66.3	63.2	68.6	50.3	72.1			Lablab AMF+ R-	2	3				Cowpea AMF- R-	3	1	68.6			Cowpea AMF- R-	3	1	50.3			Cowpea AMF- R-	3	1	72.1
Cowpea AMF- R-	3	1	66.1	63	67.4	50.3	72.9			Lablab AMF+ R-	3	3				Cowpea AMF- R-	3	1	67.4			Cowpea AMF- R-	3	1	50.3			Cowpea AMF- R-	3	1	72.9
Cowpea AMF- R-	3	1	66.7	63.7	68.5	50.1	69.5			Lablab AMF+ R-	4	3				Cowpea AMF- R-	3	1	68.5			Cowpea AMF- R-	3	1	50.1			Cowpea AMF- R-	3	1	69.5
Cowpea AMF- R-	4	1	66.3	62.8	61.7	55.9	71.2			Lablab AMF+ R-	5	3				Cowpea AMF- R-	4	1	61.7			Cowpea AMF- R-	4	1	55.9			Cowpea AMF- R-	4	1	71.2
Cowpea AMF- R-	4	1	66.4	62.4	60.8	55	75.2			Mucuna AMF- R+	1	3				Cowpea AMF- R-	4	1	60.8			Cowpea AMF- R-	4	1	55			Cowpea AMF- R-	4	1	75.2
Cowpea AMF- R-	4	1	66.1	63.1	61.4	55.3	72.3			Mucuna AMF- R+	2	3				Cowpea AMF- R-	4	1	61.4			Cowpea AMF- R-	4	1	55.3			Cowpea AMF- R-	4	1	72.3
Cowpea AMF- R-	5	1	68.9	60.6	70.5	49.8	67.9			Mucuna AMF- R+	3	3				Cowpea AMF- R-	5	1	70.5			Cowpea AMF- R-	5	1	49.8			Cowpea AMF- R-	5	1	67.9
Cowpea AMF- R-	5	1	68.2	60.3	70.4	49.2	69.3			Mucuna AMF- R+	4	3				Cowpea AMF- R-	5	1	70.4			Cowpea AMF- R-	5	1	49.2			Cowpea AMF- R-	5	1	69.3
Cowpea AMF- R-	5	1	68.7	60.3	71.2	49.5	68.6			Mucuna AMF- R+	5	3				Cowpea AMF- R-	5	1	71.2			Cowpea AMF- R-	5	1	49.5			Cowpea AMF- R-	5	1	68.6
Lablab AMF+ R+	1	1	55.2	48.5	45.9	44.6	56.3			Cowpea AMF+ R+	1	3				Lablab AMF+ R+	1	1	45.9			Lablab AMF+ R+	1	1	44.6			Lablab AMF+ R+	1	1	56.3
Lablab AMF+ R+	1	1	55.1	48	46.2	44.2	55.4			Cowpea AMF+ R+	2	3				Lablab AMF+ R+	1	1	46.2			Lablab AMF+ R+	1	1	44.2			Lablab AMF+ R+	1	1	55.4
Lablab AMF+ R+	1	1	54.8	48.3	45.6	44.7	56.2			Cowpea AMF+ R+	3	3				Lablab AMF+ R+	1	1	45.6			Lablab AMF+ R+	1	1	44.7			Lablab AMF+ R+	1	1	56.2
Lablab AMF+ R+	2	1	53.3	55.3	48.6	44.2	52.5			Cowpea AMF+ R+	4	3				Lablab AMF+ R+	2	1	48.6			Lablab AMF+ R+	2	1	44.2			Lablab AMF+ R+	2	1	52.5
Lablab AMF+ R+	2	1	53.8	53	49.2	44	50.9			Cowpea AMF+ R+	5	3				Lablab AMF+ R+	2	1	49.2			Lablab AMF+ R+	2	1	44			Lablab AMF+ R+	2	1	50.9
Lablab AMF+ R+	2	1	53.4	53.1	48.9	44.7	52.1			Lablab AMF- R-	1	3				Lablab AMF+ R+	2	1	48.9			Lablab AMF+ R+	2	1	44.7			Lablab AMF+ R+	2	1	52.1
Lablab AMF+ R+	3	1	55.7	48.1	44.6	45.6	46.5			Lablab AMF- R-	2	3				Lablab AMF+ R+	3	1	44.6			Lablab AMF+ R+	3	1	45.6			Lablab AMF+ R+	3	1	46.5
Lablab AMF+ R+	3	1	55.3	49.3	44.3	45.2	47.5			Lablab AMF- R-	3	3				Lablab AMF+ R+	3	1	44.3			Lablab AMF+ R+	3	1	45.2			Lablab AMF+ R+	3	1	47.5
Lablab AMF+ R+	3	1	55.4	48.2	43.8	45.8	48.5			Lablab AMF- R-	4	3				Lablab AMF+ R+	3	1	43.8			Lablab AMF+ R+	3	1	45.8			Lablab AMF+ R+	3	1	48.5
Lablab AMF+ R+	4	1	52.6	47.1	45.6	43.2	41.9			Lablab AMF- R-	5	3				Lablab AMF+ R+	4	1	45.6			Lablab AMF+ R+	4	1	43.2			Lablab AMF+ R+	4	1	41.9
Lablab AMF+ R+	4	1	52	47.3	44.4	43.8	40.9			Mucuna AMF+ R+	1	3				Lablab AMF+ R+	4	1	44.4			Lablab AMF+ R+	4	1	43.8			Lablab AMF+ R+	4	1	40.9
Lablab AMF+ R+	4	1	52.4	47.8	45.2	43.6	40.7			Mucuna AMF+ R+	2	3				Lablab AMF+ R+	4	1	45.2			Lablab AMF+ R+	4	1	43.6			Lablab AMF+ R+	4	1	40.7
Lablab AMF+ R+	5	1	52.7	50.3	43.7	50.1	47.9			Mucuna AMF+ R+	3	3				Lablab AMF+ R+	5	1	43.7			Lablab AMF+ R+	5	1	50.1			Lablab AMF+ R+	5	1	47.9
Lablab AMF+ R+	5	1	52.3	50	44.6	50.7	46			Mucuna AMF+ R+	4	3				Lablab AMF+ R+	5	1	44.6			Lablab AMF+ R+	5	1	50.7			Lablab AMF+ R+	5	1	46
Lablab AMF+ R+	5	1	52.4	50.7	43.4	50.2	45.1			Mucuna AMF+ R+	5	3				Lablab AMF+ R+	5	1	43.4			Lablab AMF+ R+	5	1	50.2			Lablab AMF+ R+	5	1	45.1
Lablab AMF+ R+	1	2	53.5	48.1	47.3	51.9	46.9			Mucuna AMF+ R+	1	4				Lablab AMF+ R+	1	2	47.3			Lablab AMF+ R+	1	2	51.9			Lablab AMF+ R+	1	2	46.9
Lablab AMF+ R+	1	2	53	48	48.2	51.4	48.5			Mucuna AMF+ R+	2	4				Lablab AMF+ R+	1	2	48.2			Lablab AMF+ R+	1	2	51.4			Lablab AMF+ R+	1	2	48.5
Lablab AMF+ R+	1	2	53.1	48.3	48.6	51.2	47.5			Mucuna AMF+ R+	3	4				Lablab AMF+ R+	1	2	48.6			Lablab AMF+ R+	1	2	51.2			Lablab AMF+ R+	1	2	47.5
Lablab AMF+ R+	2	2	54.9	46.2	53.4	52.1	50.8			Mucuna AMF+ R+	4	4				Lablab AMF+ R+	2	2	53.4			Lablab AMF+ R+	2	2	52.1			Lablab AMF+ R+	2	2	50.8
Lablab AMF+ R+	2	2	54	46.3	52.6	52.9	50.1			Mucuna AMF+ R+	5	4				Lablab AMF+ R+	2	2	52.6			Lablab AMF+ R+	2	2	52.9			Lablab AMF+ R+	2	2	50.1
Lablab AMF+ R+	2	2	54.6	46.8	53.1	52.4	52.2			Cowpea AMF+ R-	1	4				Lablab AMF+ R+	2	2	53.1			Lablab AMF+ R+	2	2	52.4			Lablab AMF+ R+	2	2	52.2
Lablab AMF+ R+	3	2	51.2	48.7	52.4	54.2	43.2			Cowpea AMF+ R-	2	4				Lablab AMF+ R+	3	2	52.4			Lablab AMF+ R+	3	2	54.2			Lablab AMF+ R+	3	2	43.2
Lablab AMF+ R+	3	2	51	48.3	53.3	54.3	44.8			Cowpea AMF+ R-	3	4				Lablab AMF+ R+	3	2	53.3			Lablab AMF+ R+	3	2	54.3			Lablab AMF+ R+	3	2	44.8
Lablab AMF+ R+	3	2	51.4	48.2	53.4	54.8	42.8			Cowpea AMF+ R-	4	4				Lablab AMF+ R+	3	2	53.4			Lablab AMF+ R+	3	2	54.8			Lablab AMF+ R+	3	2	42.8
Lablab AMF+ R+	4	2	48.6	47.8	50.8	49.7	49.8			Cowpea AMF+ R-	5	4				Lablab AMF+ R+	4	2	50.8			Lablab AMF+ R+	4	2	49.7			Lablab AMF+ R+	4	2	49.8
Lablab AMF+ R+	4	2	48	47.2	51.2	49.2	48.8			Lablab AMF- R+	1	4				Lablab AMF+ R+	4	2	51.2			Lablab AMF+ R+	4	2	49.2			Lablab AMF+ R+	4	2	48.8
Lablab AMF+ R+	4	2	48.1	47.2	50.6	49.2	50.2			Lablab AMF- R+	2	4				Lablab AMF+ R+	4	2	50.6			Lablab AMF+ R+	4	2	49.2			Lablab AMF+ R+	4	2	50.2
Lablab AMF+ R+	5	2	48.3	50.2	45.5	41.9	49.5			Lablab AMF- R+	3	4				Lablab AMF+ R+	5	2	45.5			Lablab AMF+ R+	5	2	41.9			Lablab AMF+ R+	5	2	49.5
Lablab AMF+ R+	5	2	48.1	50.4	46.2	42	45			Lablab AMF- R+	4	4				Lablab AMF+ R+	5	2	46.2			Lablab AMF+ R+	5	2	42			Lablab AMF+ R+	5	2	45
Lablab AMF+ R+	5	2	48.7	50.9	45.6	42	49.1			Lablab AMF- R+	5	4				Lablab AMF+ R+	5	2	45.6			Lablab AMF+ R+	5	2	42			Lablab AMF+ R+	5	2	49.1
Mucuna AMF- R-	1	2	53.9	49.8	46.7	49.9	39.8			Mucuna AMF+ R-	1	4				Mucuna AMF- R-	1	2	46.7			Mucuna AMF- R-	1	2	49.9			Mucuna AMF- R-	1	2	39.8
Mucuna AMF- R-	1	2	53.1	49	47	49.2	40.7			Mucuna AMF+ R-	2	4				Mucuna AMF- R-	1	2	47			Mucuna AMF- R-	1	2	49.2			Mucuna AMF- R-	1	2	40.7
Mucuna AMF- R-	1	2	53.4	49.3	46.8	49.7	41.5			Mucuna AMF+ R-	3	4				Mucuna AMF- R-	1	2	46.8			Mucuna AMF- R-	1	2	49.7			Mucuna AMF- R-	1	2	41.5
Mucuna AMF- R-	2	2	52.1	42.6	41.1	47.2	51.8			Mucuna AMF+ R-	4	4				Mucuna AMF- R-	2	2	41.1			Mucuna AMF- R-	2	2	47.2			Mucuna AMF- R-	2	2	51.8
Mucuna AMF- R-	2	2	52.4	42.3	40.8	47	52.5			Mucuna AMF+ R-	5	4				Mucuna AMF- R-	2	2	40.8			Mucuna AMF- R-	2	2	47			Mucuna AMF- R-	2	2	52.5
Mucuna AMF- R-	2	2	52.3	42.1	41	47.2	53.7			Cowpea AMF- R+	1	4				Mucuna AMF- R-	2	2	41			Mucuna AMF- R-	2	2	47.2			Mucuna AMF- R-	2	2	53.7
Mucuna AMF- R-	3	2	45.6	51.8	57.4	42.1	45.7			Cowpea AMF- R+	2	4				Mucuna AMF- R-	3	2	57.4			Mucuna AMF- R-	3	2	42.1			Mucuna AMF- R-	3	2	45.7
Mucuna AMF- R-	3	2	45	51	58.4	42.5	44.5			Cowpea AMF- R+	3	4				Mucuna AMF- R-	3	2	58.4			Mucuna AMF- R-	3	2	42.5			Mucuna AMF- R-	3	2	44.5
Mucuna AMF- R-	3	2	45.1	51.4	57.6	42.8	45.9			Cowpea AMF- R+	4	4				Mucuna AMF- R-	3	2	57.6			Mucuna AMF- R-	3	2	42.8			Mucuna AMF- R-	3	2	45.9
Mucuna AMF- R-	4	2	51.2	55.3	54.7	43.3	38.4			Cowpea AMF- R+	5	4				Mucuna AMF- R-	4	2	54.7			Mucuna AMF- R-	4	2	43.3			Mucuna AMF- R-	4	2	38.4
Mucuna AMF- R-	4	2	51	55	54.6	43	38.8			Lablab AMF+ R-	1	4				Mucuna AMF- R-	4	2	54.6			Mucuna AMF- R-	4	2	43			Mucuna AMF- R-	4	2	38.8
Mucuna AMF- R-	4	2	52.3	55.2	54	43	38.1			Lablab AMF+ R-	2	4				Mucuna AMF- R-	4	2	54			Mucuna AMF- R-	4	2	43			Mucuna AMF- R-	4	2	38.1
Mucuna AMF- R-	5	2	44	53.4	41.3	37.4	35.5			Lablab AMF+ R-	3	4				Mucuna AMF- R-	5	2	41.3			Mucuna AMF- R-	5	2	37.4			Mucuna AMF- R-	5	2	35.5
Mucuna AMF- R-	5	2	44.1	53	42.5	37	35.1			Lablab AMF+ R-	4	4				Mucuna AMF- R-	5	2	42.5			Mucuna AMF- R-	5	2	37			Mucuna AMF- R-	5	2	35.1
Mucuna AMF- R-	5	2	44.7	53.1	41.8	37.9	34.8			Lablab AMF+ R-	5	4				Mucuna AMF- R-	5	2	41.8			Mucuna AMF- R-	5	2	37.9			Mucuna AMF- R-	5	2	34.8
Cowpea AMF+ R+	1	2	64.6	73.1	72.1	63.5	68.9			Mucuna AMF- R+	1	4				Cowpea AMF+ R+	1	2	72.1			Cowpea AMF+ R+	1	2	63.5			Cowpea AMF+ R+	1	2	68.9
Cowpea AMF+ R+	1	2	63.5	73	71.3	64	69.2			Mucuna AMF- R+	2	4				Cowpea AMF+ R+	1	2	71.3			Cowpea AMF+ R+	1	2	64			Cowpea AMF+ R+	1	2	69.2
Cowpea AMF+ R+	1	2	64.6	73.5	72.5	64	69.3			Mucuna AMF- R+	3	4				Cowpea AMF+ R+	1	2	72.5			Cowpea AMF+ R+	1	2	64			Cowpea AMF+ R+	1	2	69.3
Cowpea AMF+ R+	2	2	64.6	75.2	69.5	61.5	68.8			Mucuna AMF- R+	4	4				Cowpea AMF+ R+	2	2	69.5			Cowpea AMF+ R+	2	2	61.5			Cowpea AMF+ R+	2	2	68.8
Cowpea AMF+ R+	2	2	64.4	75	70.1	61.8	70.5			Mucuna AMF- R+	5	4				Cowpea AMF+ R+	2	2	70.1			Cowpea AMF+ R+	2	2	61.8			Cowpea AMF+ R+	2	2	70.5
Cowpea AMF+ R+	2	2	65	75.4	69.7	61.3	71.1			Cowpea AMF- R-	1	4				Cowpea AMF+ R+	2	2	69.7			Cowpea AMF+ R+	2	2	61.3			Cowpea AMF+ R+	2	2	71.1
Cowpea AMF+ R+	3	2	62.9	74.1	62.1	60.4	62.5			Cowpea AMF- R-	2	4				Cowpea AMF+ R+	3	2	62.1			Cowpea AMF+ R+	3	2	60.4			Cowpea AMF+ R+	3	2	62.5
Cowpea AMF+ R+	3	2	62.4	74.2	62.5	60.8	62.7			Cowpea AMF- R-	3	4				Cowpea AMF+ R+	3	2	62.5			Cowpea AMF+ R+	3	2	60.8			Cowpea AMF+ R+	3	2	62.7
Cowpea AMF+ R+	3	2	62.7	74.1	63.4	60.1	63.8			Cowpea AMF- R-	4	4				Cowpea AMF+ R+	3	2	63.4			Cowpea AMF+ R+	3	2	60.1			Cowpea AMF+ R+	3	2	63.8
Cowpea AMF+ R+	4	2	69.7	74.1	68.6	61.5	63.8			Cowpea AMF- R-	5	4				Cowpea AMF+ R+	4	2	68.6			Cowpea AMF+ R+	4	2	61.5			Cowpea AMF+ R+	4	2	63.8
Cowpea AMF+ R+	4	2	68.7	74	67.5	61.4	63.9			Lablab AMF+ R+	1	4				Cowpea AMF+ R+	4	2	67.5			Cowpea AMF+ R+	4	2	61.4			Cowpea AMF+ R+	4	2	63.9
Cowpea AMF+ R+	4	2	69.8	74	68.2	61.9	62.7			Lablab AMF+ R+	2	4				Cowpea AMF+ R+	4	2	68.2			Cowpea AMF+ R+	4	2	61.9			Cowpea AMF+ R+	4	2	62.7
Cowpea AMF+ R+	5	2	66.6	74.3	57.9	62.6	63.3			Lablab AMF+ R+	3	4				Cowpea AMF+ R+	5	2	57.9			Cowpea AMF+ R+	5	2	62.6			Cowpea AMF+ R+	5	2	63.3
Cowpea AMF+ R+	5	2	66.4	74.6	58.2	62.3	65.9			Lablab AMF+ R+	4	4				Cowpea AMF+ R+	5	2	58.2			Cowpea AMF+ R+	5	2	62.3			Cowpea AMF+ R+	5	2	65.9
Cowpea AMF+ R+	5	2	66.1	74.7	57.6	62.4	65.4			Lablab AMF+ R+	5	4				Cowpea AMF+ R+	5	2	57.6			Cowpea AMF+ R+	5	2	62.4			Cowpea AMF+ R+	5	2	65.4
Lablab AMF- R-	1	2	55.5	49.4	50.4	42.7	67.1			Mucuna AMF- R-	1	4				Lablab AMF- R-	1	2	50.4			Lablab AMF- R-	1	2	42.7			Lablab AMF- R-	1	2	67.1
Lablab AMF- R-	1	2	55.1	49	50.8	42	45.5			Mucuna AMF- R-	2	4				Lablab AMF- R-	1	2	50.8			Lablab AMF- R-	1	2	42			Lablab AMF- R-	1	2	45.5
Lablab AMF- R-	1	2	55.4	49.3	51.2	42	43.9			Mucuna AMF- R-	3	4				Lablab AMF- R-	1	2	51.2			Lablab AMF- R-	1	2	42			Lablab AMF- R-	1	2	43.9
Lablab AMF- R-	2	2	52.4	48	50.8	46.8	43			Mucuna AMF- R-	4	4				Lablab AMF- R-	2	2	50.8			Lablab AMF- R-	2	2	46.8			Lablab AMF- R-	2	2	43
Lablab AMF- R-	2	2	52.3	48.1	49.6	46	43.1			Mucuna AMF- R-	5	4				Lablab AMF- R-	2	2	49.6			Lablab AMF- R-	2	2	46			Lablab AMF- R-	2	2	43.1
Lablab AMF- R-	2	2	52.7	48.7	49.5	46.2	42.5			Cowpea AMF+ R+	1	4				Lablab AMF- R-	2	2	49.5			Lablab AMF- R-	2	2	46.2			Lablab AMF- R-	2	2	42.5
Lablab AMF- R-	3	2	51.9	46.5	49.3	39.1	42.1			Cowpea AMF+ R+	2	4				Lablab AMF- R-	3	2	49.3			Lablab AMF- R-	3	2	39.1			Lablab AMF- R-	3	2	42.1
Lablab AMF- R-	3	2	51	46.2	48.7	39.7	43.2			Cowpea AMF+ R+	3	4				Lablab AMF- R-	3	2	48.7			Lablab AMF- R-	3	2	39.7			Lablab AMF- R-	3	2	43.2
Lablab AMF- R-	3	2	51.4	46.8	49.4	39.5	42.8			Cowpea AMF+ R+	4	4				Lablab AMF- R-	3	2	49.4			Lablab AMF- R-	3	2	39.5			Lablab AMF- R-	3	2	42.8
Lablab AMF- R-	4	2	56.1	49.5	53.1	48.1	43.6			Cowpea AMF+ R+	5	4				Lablab AMF- R-	4	2	53.1			Lablab AMF- R-	4	2	48.1			Lablab AMF- R-	4	2	43.6
Lablab AMF- R-	4	2	56.7	49.1	53.4	48.5	36.9			Lablab AMF- R-	1	4				Lablab AMF- R-	4	2	53.4			Lablab AMF- R-	4	2	48.5			Lablab AMF- R-	4	2	36.9
Lablab AMF- R-	4	2	56.3	49.3	52.8	48.6	36.1			Lablab AMF- R-	2	4				Lablab AMF- R-	4	2	52.8			Lablab AMF- R-	4	2	48.6			Lablab AMF- R-	4	2	36.1
Lablab AMF- R-	5	2	54.3	48.1	47	38.2	35.1			Lablab AMF- R-	3	4				Lablab AMF- R-	5	2	47			Lablab AMF- R-	5	2	38.2			Lablab AMF- R-	5	2	35.1
Lablab AMF- R-	5	2	54.8	48.7	47.3	38	49.9			Lablab AMF- R-	4	4				Lablab AMF- R-	5	2	47.3			Lablab AMF- R-	5	2	38			Lablab AMF- R-	5	2	49.9
Lablab AMF- R-	5	2	54	48.5	46.5	38.4	48.5			Lablab AMF- R-	5	4				Lablab AMF- R-	5	2	46.5			Lablab AMF- R-	5	2	38.4			Lablab AMF- R-	5	2	48.5
Mucuna AMF+ R+	1	2	59.9	57.6	49.6	53.2	48.7									Mucuna AMF+ R+	1	2	49.6			Mucuna AMF+ R+	1	2	53.2			Mucuna AMF+ R+	1	2	48.7
Mucuna AMF+ R+	1	2	58	57	48.8	53	52.7									Mucuna AMF+ R+	1	2	48.8			Mucuna AMF+ R+	1	2	53			Mucuna AMF+ R+	1	2	52.7
Mucuna AMF+ R+	1	2	58.4	57.4	48.5	53.7	53									Mucuna AMF+ R+	1	2	48.5			Mucuna AMF+ R+	1	2	53.7			Mucuna AMF+ R+	1	2	53
Mucuna AMF+ R+	2	2	56.7	56	48.5	55.6	52.8									Mucuna AMF+ R+	2	2	48.5			Mucuna AMF+ R+	2	2	55.6			Mucuna AMF+ R+	2	2	52.8
Mucuna AMF+ R+	2	2	56	56.6	47.1	55.1	39.8									Mucuna AMF+ R+	2	2	47.1			Mucuna AMF+ R+	2	2	55.1			Mucuna AMF+ R+	2	2	39.8
Mucuna AMF+ R+	2	2	56.4	56.2	48.8	55.2	39.6									Mucuna AMF+ R+	2	2	48.8			Mucuna AMF+ R+	2	2	55.2			Mucuna AMF+ R+	2	2	39.6
Mucuna AMF+ R+	3	2	56.4	53.5	48.5	52.3	40.1									Mucuna AMF+ R+	3	2	48.5			Mucuna AMF+ R+	3	2	52.3			Mucuna AMF+ R+	3	2	40.1
Mucuna AMF+ R+	3	2	56.2	53	48.5	52.4	49.8									Mucuna AMF+ R+	3	2	48.5			Mucuna AMF+ R+	3	2	52.4			Mucuna AMF+ R+	3	2	49.8
Mucuna AMF+ R+	3	2	56.1	53.7	49.2	52.6	49.5									Mucuna AMF+ R+	3	2	49.2			Mucuna AMF+ R+	3	2	52.6			Mucuna AMF+ R+	3	2	49.5
Mucuna AMF+ R+	4	2	52.9	55.8	53.8	50.4	50.1									Mucuna AMF+ R+	4	2	53.8			Mucuna AMF+ R+	4	2	50.4			Mucuna AMF+ R+	4	2	50.1
Mucuna AMF+ R+	4	2	52.1	55.3	52.6	50.7	55.5									Mucuna AMF+ R+	4	2	52.6			Mucuna AMF+ R+	4	2	50.7			Mucuna AMF+ R+	4	2	55.5
Mucuna AMF+ R+	4	2	52.4	55.4	52.5	50.3	56									Mucuna AMF+ R+	4	2	52.5			Mucuna AMF+ R+	4	2	50.3			Mucuna AMF+ R+	4	2	56
Mucuna AMF+ R+	5	2	50.1	53.2	49.2	51.2	55.6									Mucuna AMF+ R+	5	2	49.2			Mucuna AMF+ R+	5	2	51.2			Mucuna AMF+ R+	5	2	55.6
Mucuna AMF+ R+	5	2	50.4	53.7	48.7	51.3	45.5									Mucuna AMF+ R+	5	2	48.7			Mucuna AMF+ R+	5	2	51.3			Mucuna AMF+ R+	5	2	45.5
Mucuna AMF+ R+	5	2	50.7	54.3	48.6	51.3	45.1									Mucuna AMF+ R+	5	2	48.6			Mucuna AMF+ R+	5	2	51.3			Mucuna AMF+ R+	5	2	45.1
Cowpea AMF- R-	1	2	76.3	63.4	62.5	59.3	44.9									Cowpea AMF- R-	1	2	62.5			Cowpea AMF- R-	1	2	59.3			Cowpea AMF- R-	1	2	44.9
Cowpea AMF- R-	1	2	76.1	62.4	63.1	59	64.2									Cowpea AMF- R-	1	2	63.1			Cowpea AMF- R-	1	2	59			Cowpea AMF- R-	1	2	64.2
Cowpea AMF- R-	1	2	76.7	63.5	62.8	59.4	63.9									Cowpea AMF- R-	1	2	62.8			Cowpea AMF- R-	1	2	59.4			Cowpea AMF- R-	1	2	63.9
Cowpea AMF- R-	2	2	68.5	68.2	70	61.2	64									Cowpea AMF- R-	2	2	70			Cowpea AMF- R-	2	2	61.2			Cowpea AMF- R-	2	2	64
Cowpea AMF- R-	2	2	68.2	68.6	71.2	61.5	60.1									Cowpea AMF- R-	2	2	71.2			Cowpea AMF- R-	2	2	61.5			Cowpea AMF- R-	2	2	60.1
Cowpea AMF- R-	2	2	68.1	67.5	70.7	61.3	59.8									Cowpea AMF- R-	2	2	70.7			Cowpea AMF- R-	2	2	61.3			Cowpea AMF- R-	2	2	59.8
Cowpea AMF- R-	3	2	63.7	67.8	73.1	68.3	58.7									Cowpea AMF- R-	3	2	73.1			Cowpea AMF- R-	3	2	68.3			Cowpea AMF- R-	3	2	58.7
Cowpea AMF- R-	3	2	63.1	68.4	73.5	68.5	66.3									Cowpea AMF- R-	3	2	73.5			Cowpea AMF- R-	3	2	68.5			Cowpea AMF- R-	3	2	66.3
Cowpea AMF- R-	3	2	63.8	67	74.2	68.2	65.7									Cowpea AMF- R-	3	2	74.2			Cowpea AMF- R-	3	2	68.2			Cowpea AMF- R-	3	2	65.7
Cowpea AMF- R-	4	2	67.4	61.1	69.1	58.1	64.1									Cowpea AMF- R-	4	2	69.1			Cowpea AMF- R-	4	2	58.1			Cowpea AMF- R-	4	2	64.1
Cowpea AMF- R-	4	2	67.9	62.5	68.2	58.2	72.9									Cowpea AMF- R-	4	2	68.2			Cowpea AMF- R-	4	2	58.2			Cowpea AMF- R-	4	2	72.9
Cowpea AMF- R-	4	2	67.1	62	68.7	58	71									Cowpea AMF- R-	4	2	68.7			Cowpea AMF- R-	4	2	58			Cowpea AMF- R-	4	2	71
Cowpea AMF- R-	5	2	67.2	61.4	61.7	58.2	69.9									Cowpea AMF- R-	5	2	61.7			Cowpea AMF- R-	5	2	58.2			Cowpea AMF- R-	5	2	69.9
Cowpea AMF- R-	5	2	67.4	60.8	60.8	58.3	61.7									Cowpea AMF- R-	5	2	60.8			Cowpea AMF- R-	5	2	58.3			Cowpea AMF- R-	5	2	61.7
Cowpea AMF- R-	5	2	67.3	60.9	61.6	58.4	62									Cowpea AMF- R-	5	2	61.6			Cowpea AMF- R-	5	2	58.4			Cowpea AMF- R-	5	2	62
Lablab AM+- R-	1	2	58.3	46.8	52.3	4739	61.8									Lablab AM+- R-	1	2	52.3			Lablab AM+- R-	1	2	4739			Lablab AM+- R-	1	2	61.8
Lablab AM+- R-	1	2	58.1	46	52.2	47	48.5									Lablab AM+- R-	1	2	52.2			Lablab AM+- R-	1	2	47			Lablab AM+- R-	1	2	48.5
Lablab AM+- R-	1	2	58.4	46.2	53	47	47.8									Lablab AM+- R-	1	2	53			Lablab AM+- R-	1	2	47			Lablab AM+- R-	1	2	47.8
Lablab AM+- R-	2	2	53.4	47.6	55.1	48.3	48.2									Lablab AM+- R-	2	2	55.1			Lablab AM+- R-	2	2	48.3			Lablab AM+- R-	2	2	48.2
Lablab AM+- R-	2	2	53.1	47	54.8	48.5	37.5									Lablab AM+- R-	2	2	54.8			Lablab AM+- R-	2	2	48.5			Lablab AM+- R-	2	2	37.5
Lablab AM+- R-	2	2	53.7	46.8	55.2	48.6	38.2									Lablab AM+- R-	2	2	55.2			Lablab AM+- R-	2	2	48.6			Lablab AM+- R-	2	2	38.2
Lablab AM+- R-	3	2	52.8	45.8	47.1	49.7	38.1									Lablab AM+- R-	3	2	47.1			Lablab AM+- R-	3	2	49.7			Lablab AM+- R-	3	2	38.1
Lablab AM+- R-	3	2	52.4	48.3	48.3	49.2	36.8									Lablab AM+- R-	3	2	48.3			Lablab AM+- R-	3	2	49.2			Lablab AM+- R-	3	2	36.8
Lablab AM+- R-	3	2	52.7	48.1	48.2	49.6	36.8									Lablab AM+- R-	3	2	48.2			Lablab AM+- R-	3	2	49.6			Lablab AM+- R-	3	2	36.8
Lablab AM+- R-	4	2	56	55.4	56.9	47.5	37									Lablab AM+- R-	4	2	56.9			Lablab AM+- R-	4	2	47.5			Lablab AM+- R-	4	2	37
Lablab AM+- R-	4	2	56.1	55	56.7	47.2	34.5									Lablab AM+- R-	4	2	56.7			Lablab AM+- R-	4	2	47.2			Lablab AM+- R-	4	2	34.5
Lablab AM+- R-	4	2	56.1	55.1	57.3	47	33.5									Lablab AM+- R-	4	2	57.3			Lablab AM+- R-	4	2	47			Lablab AM+- R-	4	2	33.5
Lablab AM+- R-	5	2	54	50.9	44.8	46.5	33.5									Lablab AM+- R-	5	2	44.8			Lablab AM+- R-	5	2	46.5			Lablab AM+- R-	5	2	33.5
Lablab AM+- R-	5	2	53.1	51	45.2	47	48.7									Lablab AM+- R-	5	2	45.2			Lablab AM+- R-	5	2	47			Lablab AM+- R-	5	2	48.7
Lablab AM+- R-	5	2	53.4	50.7	44.1	47	46.7									Lablab AM+- R-	5	2	44.1			Lablab AM+- R-	5	2	47			Lablab AM+- R-	5	2	46.7
Mucuna AMF- R+	1	2	48.3	51.6	53.9	41.8	47.5									Mucuna AMF- R+	1	2	53.9			Mucuna AMF- R+	1	2	41.8			Mucuna AMF- R+	1	2	47.5
Mucuna AMF- R+	1	2	48.2	51.4	54.9	41	42.9									Mucuna AMF- R+	1	2	54.9			Mucuna AMF- R+	1	2	41			Mucuna AMF- R+	1	2	42.9
Mucuna AMF- R+	1	2	48.1	51.8	53.8	41.6	43.6									Mucuna AMF- R+	1	2	53.8			Mucuna AMF- R+	1	2	41.6			Mucuna AMF- R+	1	2	43.6
Mucuna AMF- R+	2	2	51	55.8	37.8	48.2	43.4									Mucuna AMF- R+	2	2	37.8			Mucuna AMF- R+	2	2	48.2			Mucuna AMF- R+	2	2	43.4
Mucuna AMF- R+	2	2	51.6	56.8	37.8	48	52.7									Mucuna AMF- R+	2	2	37.8			Mucuna AMF- R+	2	2	48			Mucuna AMF- R+	2	2	52.7
Mucuna AMF- R+	2	2	51.3	55.8	36.7	48.3	53									Mucuna AMF- R+	2	2	36.7			Mucuna AMF- R+	2	2	48.3			Mucuna AMF- R+	2	2	53
Mucuna AMF- R+	3	2	52.9	58	48.9	48.2	53.4									Mucuna AMF- R+	3	2	48.9			Mucuna AMF- R+	3	2	48.2			Mucuna AMF- R+	3	2	53.4
Mucuna AMF- R+	3	2	53	57.2	48.5	48.5	49.1									Mucuna AMF- R+	3	2	48.5			Mucuna AMF- R+	3	2	48.5			Mucuna AMF- R+	3	2	49.1
Mucuna AMF- R+	3	2	52.4	58.2	49.7	48.3	48.1									Mucuna AMF- R+	3	2	49.7			Mucuna AMF- R+	3	2	48.3			Mucuna AMF- R+	3	2	48.1
Mucuna AMF- R+	4	2	46.6	57.2	47.8	46.5	48.5									Mucuna AMF- R+	4	2	47.8			Mucuna AMF- R+	4	2	46.5			Mucuna AMF- R+	4	2	48.5
Mucuna AMF- R+	4	2	46.5	56.8	46.5	45.9	53.6									Mucuna AMF- R+	4	2	46.5			Mucuna AMF- R+	4	2	45.9			Mucuna AMF- R+	4	2	53.6
Mucuna AMF- R+	4	2	46.1	56	46.5	45.8	52.8									Mucuna AMF- R+	4	2	46.5			Mucuna AMF- R+	4	2	45.8			Mucuna AMF- R+	4	2	52.8
Mucuna AMF- R+	5	2	55.8	55	60.7	44.5	54.5									Mucuna AMF- R+	5	2	60.7			Mucuna AMF- R+	5	2	44.5			Mucuna AMF- R+	5	2	54.5
Mucuna AMF- R+	5	2	55	54.5	61	45	45.9									Mucuna AMF- R+	5	2	61			Mucuna AMF- R+	5	2	45			Mucuna AMF- R+	5	2	45.9
Mucuna AMF- R+	5	2	55.1	55.3	61.7	45	44.6									Mucuna AMF- R+	5	2	61.7			Mucuna AMF- R+	5	2	45			Mucuna AMF- R+	5	2	44.6
Cowpea AMF+ R-	1	2	71.4	64	67.2	57.9	44.3									Cowpea AMF+ R-	1	2	67.2			Cowpea AMF+ R-	1	2	57.9			Cowpea AMF+ R-	1	2	44.3
Cowpea AMF+ R-	1	2	71.6	63.2	68.2	57.2	63.7									Cowpea AMF+ R-	1	2	68.2			Cowpea AMF+ R-	1	2	57.2			Cowpea AMF+ R-	1	2	63.7
Cowpea AMF+ R-	1	2	71.4	64.9	68	57	64.5									Cowpea AMF+ R-	1	2	68			Cowpea AMF+ R-	1	2	57			Cowpea AMF+ R-	1	2	64.5
Cowpea AMF+ R-	2	2	71.2	61.7	62.9	54.5	64.9									Cowpea AMF+ R-	2	2	62.9			Cowpea AMF+ R-	2	2	54.5			Cowpea AMF+ R-	2	2	64.9
Cowpea AMF+ R-	2	2	71.5	61.8	61.6	54.2	57.8									Cowpea AMF+ R-	2	2	61.6			Cowpea AMF+ R-	2	2	54.2			Cowpea AMF+ R-	2	2	57.8
Cowpea AMF+ R-	2	2	71.9	62	62.9	54.7	58.2									Cowpea AMF+ R-	2	2	62.9			Cowpea AMF+ R-	2	2	54.7			Cowpea AMF+ R-	2	2	58.2
Cowpea AMF+ R-	3	2	68	66.9	60.3	52.5	58.8									Cowpea AMF+ R-	3	2	60.3			Cowpea AMF+ R-	3	2	52.5			Cowpea AMF+ R-	3	2	58.8
Cowpea AMF+ R-	3	2	67.7	66.7	60	52	64.3									Cowpea AMF+ R-	3	2	60			Cowpea AMF+ R-	3	2	52			Cowpea AMF+ R-	3	2	64.3
Cowpea AMF+ R-	3	2	67.5	66.5	60.5	52	65.1									Cowpea AMF+ R-	3	2	60.5			Cowpea AMF+ R-	3	2	52			Cowpea AMF+ R-	3	2	65.1
Cowpea AMF+ R-	4	2	67.8	67	74.8	51.5	65.5									Cowpea AMF+ R-	4	2	74.8			Cowpea AMF+ R-	4	2	51.5			Cowpea AMF+ R-	4	2	65.5
Cowpea AMF+ R-	4	2	67	67.3	74	51.6	70.8									Cowpea AMF+ R-	4	2	74			Cowpea AMF+ R-	4	2	51.6			Cowpea AMF+ R-	4	2	70.8
Cowpea AMF+ R-	4	2	67.4	67.2	74	51.4	71.7									Cowpea AMF+ R-	4	2	74			Cowpea AMF+ R-	4	2	51.4			Cowpea AMF+ R-	4	2	71.7
Cowpea AMF+ R-	5	2	63.5	64.5	68.4	55.4	70.5									Cowpea AMF+ R-	5	2	68.4			Cowpea AMF+ R-	5	2	55.4			Cowpea AMF+ R-	5	2	70.5
Cowpea AMF+ R-	5	2	64.7	64.3	69	55.2	64.4									Cowpea AMF+ R-	5	2	69			Cowpea AMF+ R-	5	2	55.2			Cowpea AMF+ R-	5	2	64.4
Cowpea AMF+ R-	5	2	64	64	68.3	55	65.3									Cowpea AMF+ R-	5	2	68.3			Cowpea AMF+ R-	5	2	55			Cowpea AMF+ R-	5	2	65.3
Lablab AMF- R+	1	2	53.6	53.6	52.3	47.1	64.8									Lablab AMF- R+	1	2	52.3			Lablab AMF- R+	1	2	47.1			Lablab AMF- R+	1	2	64.8
Lablab AMF- R+	1	2	52.3	53	53	47.2	43.5									Lablab AMF- R+	1	2	53			Lablab AMF- R+	1	2	47.2			Lablab AMF- R+	1	2	43.5
Lablab AMF- R+	1	2	53	55.4	53.2	47.3	42.8									Lablab AMF- R+	1	2	53.2			Lablab AMF- R+	1	2	47.3			Lablab AMF- R+	1	2	42.8
Lablab AMF- R+	2	2	57.2	55.2	52.4	44.6	44.7									Lablab AMF- R+	2	2	52.4			Lablab AMF- R+	2	2	44.6			Lablab AMF- R+	2	2	44.7
Lablab AMF- R+	2	2	57	55.7	52.7	44.2	43.5									Lablab AMF- R+	2	2	52.7			Lablab AMF- R+	2	2	44.2			Lablab AMF- R+	2	2	43.5
Lablab AMF- R+	2	2	57.8	55	52.5	44.8	43.5									Lablab AMF- R+	2	2	52.5			Lablab AMF- R+	2	2	44.8			Lablab AMF- R+	2	2	43.5
Lablab AMF- R+	3	2	53.1	55.6	48.9	46	42.8									Lablab AMF- R+	3	2	48.9			Lablab AMF- R+	3	2	46			Lablab AMF- R+	3	2	42.8
Lablab AMF- R+	3	2	53.4	55.1	49	46	37									Lablab AMF- R+	3	2	49			Lablab AMF- R+	3	2	46			Lablab AMF- R+	3	2	37
Lablab AMF- R+	3	2	53.7	55.3	49.3	46.3	38.2									Lablab AMF- R+	3	2	49.3			Lablab AMF- R+	3	2	46.3			Lablab AMF- R+	3	2	38.2
Lablab AMF- R+	4	2	57.5	58.5	54.9	44.1	38.6									Lablab AMF- R+	4	2	54.9			Lablab AMF- R+	4	2	44.1			Lablab AMF- R+	4	2	38.6
Lablab AMF- R+	4	2	57.5	58	55	44.2	49									Lablab AMF- R+	4	2	55			Lablab AMF- R+	4	2	44.2			Lablab AMF- R+	4	2	49
Lablab AMF- R+	4	2	57.4	58.4	55.2	44.5	48.5									Lablab AMF- R+	4	2	55.2			Lablab AMF- R+	4	2	44.5			Lablab AMF- R+	4	2	48.5
Lablab AMF- R+	5	2	54.2	55.7	52.2	46	48.2									Lablab AMF- R+	5	2	52.2			Lablab AMF- R+	5	2	46			Lablab AMF- R+	5	2	48.2
Lablab AMF- R+	5	2	54.7	55.9	51.8	46.3	37									Lablab AMF- R+	5	2	51.8			Lablab AMF- R+	5	2	46.3			Lablab AMF- R+	5	2	37
Lablab AMF- R+	5	2	54.1	55.1	52.3	46.5	38.1									Lablab AMF- R+	5	2	52.3			Lablab AMF- R+	5	2	46.5			Lablab AMF- R+	5	2	38.1
Mucuna AMF+ R-	1	2	54	55.8	49.9	36.5	39.5									Mucuna AMF+ R-	1	2	49.9			Mucuna AMF+ R-	1	2	36.5			Mucuna AMF+ R-	1	2	39.5
Mucuna AMF+ R-	1	2	54.1	55	50.2	36.7	52.9									Mucuna AMF+ R-	1	2	50.2			Mucuna AMF+ R-	1	2	36.7			Mucuna AMF+ R-	1	2	52.9
Mucuna AMF+ R-	1	2	54	55.7	50.4	36.5	51.8									Mucuna AMF+ R-	1	2	50.4			Mucuna AMF+ R-	1	2	36.5			Mucuna AMF+ R-	1	2	51.8
Mucuna AMF+ R-	2	2	54.4	52	44.1	35.2	53									Mucuna AMF+ R-	2	2	44.1			Mucuna AMF+ R-	2	2	35.2			Mucuna AMF+ R-	2	2	53
Mucuna AMF+ R-	2	2	54	51.9	44.1	35.7	48.6									Mucuna AMF+ R-	2	2	44.1			Mucuna AMF+ R-	2	2	35.7			Mucuna AMF+ R-	2	2	48.6
Mucuna AMF+ R-	2	2	54.4	51.7	43.9	35	47.5									Mucuna AMF+ R-	2	2	43.9			Mucuna AMF+ R-	2	2	35			Mucuna AMF+ R-	2	2	47.5
Mucuna AMF+ R-	3	2	54.2	52.6	46.6	36.2	47.2									Mucuna AMF+ R-	3	2	46.6			Mucuna AMF+ R-	3	2	36.2			Mucuna AMF+ R-	3	2	47.2
Mucuna AMF+ R-	3	2	54	52	45.8	36.5	41.5									Mucuna AMF+ R-	3	2	45.8			Mucuna AMF+ R-	3	2	36.5			Mucuna AMF+ R-	3	2	41.5
Mucuna AMF+ R-	3	2	54.2	52.6	44.9	36.2	42.7									Mucuna AMF+ R-	3	2	44.9			Mucuna AMF+ R-	3	2	36.2			Mucuna AMF+ R-	3	2	42.7
Mucuna AMF+ R-	4	2	52.9	58.5	59.1	36	40.9									Mucuna AMF+ R-	4	2	59.1			Mucuna AMF+ R-	4	2	36			Mucuna AMF+ R-	4	2	40.9
Mucuna AMF+ R-	4	2	52.7	59	58.3	36	46.9									Mucuna AMF+ R-	4	2	58.3			Mucuna AMF+ R-	4	2	36			Mucuna AMF+ R-	4	2	46.9
Mucuna AMF+ R-	4	2	52.3	58.7	57.9	36.5	46.5									Mucuna AMF+ R-	4	2	57.9			Mucuna AMF+ R-	4	2	36.5			Mucuna AMF+ R-	4	2	46.5
Mucuna AMF+ R-	5	2	56.6	58.8	51.7	36.4	47.9									Mucuna AMF+ R-	5	2	51.7			Mucuna AMF+ R-	5	2	36.4			Mucuna AMF+ R-	5	2	47.9
Mucuna AMF+ R-	5	2	56.1	57.6	50.5	36.7	55.2									Mucuna AMF+ R-	5	2	50.5			Mucuna AMF+ R-	5	2	36.7			Mucuna AMF+ R-	5	2	55.2
Mucuna AMF+ R-	5	2	56.8	57	50.2	36.1	55.4									Mucuna AMF+ R-	5	2	50.2			Mucuna AMF+ R-	5	2	36.1			Mucuna AMF+ R-	5	2	55.4
Cowpea AMF- R+	1	2	57.4	62.5	56.3	64.2	54.5									Cowpea AMF- R+	1	2	56.3			Cowpea AMF- R+	1	2	64.2			Cowpea AMF- R+	1	2	54.5
Cowpea AMF- R+	1	2	57	63	57	64.7	64.3									Cowpea AMF- R+	1	2	57			Cowpea AMF- R+	1	2	64.7			Cowpea AMF- R+	1	2	64.3
Cowpea AMF- R+	1	2	57.3	63.1	56.8	64.2	62									Cowpea AMF- R+	1	2	56.8			Cowpea AMF- R+	1	2	64.2			Cowpea AMF- R+	1	2	62
Cowpea AMF- R+	2	2	64.5	60.1	54	68.8	63.2									Cowpea AMF- R+	2	2	54			Cowpea AMF- R+	2	2	68.8			Cowpea AMF- R+	2	2	63.2
Cowpea AMF- R+	2	2	65	60.4	53.7	68	64.1									Cowpea AMF- R+	2	2	53.7			Cowpea AMF- R+	2	2	68			Cowpea AMF- R+	2	2	64.1
Cowpea AMF- R+	2	2	64.8	60.7	54.2	69.5	63.8									Cowpea AMF- R+	2	2	54.2			Cowpea AMF- R+	2	2	69.5			Cowpea AMF- R+	2	2	63.8
Cowpea AMF- R+	3	2	59.3	67	69.2	63.5	63.2									Cowpea AMF- R+	3	2	69.2			Cowpea AMF- R+	3	2	63.5			Cowpea AMF- R+	3	2	63.2
Cowpea AMF- R+	3	2	59.2	67.9	68.7	63.4	60.8									Cowpea AMF- R+	3	2	68.7			Cowpea AMF- R+	3	2	63.4			Cowpea AMF- R+	3	2	60.8
Cowpea AMF- R+	3	2	59.1	67.1	68.5	63	61.5									Cowpea AMF- R+	3	2	68.5			Cowpea AMF- R+	3	2	63			Cowpea AMF- R+	3	2	61.5
Cowpea AMF- R+	4	2	66.2	65.4	64.8	62.5	62.3									Cowpea AMF- R+	4	2	64.8			Cowpea AMF- R+	4	2	62.5			Cowpea AMF- R+	4	2	62.3
Cowpea AMF- R+	4	2	66.1	65	64.9	62	60.5									Cowpea AMF- R+	4	2	64.9			Cowpea AMF- R+	4	2	62			Cowpea AMF- R+	4	2	60.5
Cowpea AMF- R+	4	2	66	65	63.7	63.7	60.9									Cowpea AMF- R+	4	2	63.7			Cowpea AMF- R+	4	2	63.7			Cowpea AMF- R+	4	2	60.9
Cowpea AMF- R+	5	2	61.2	64.5	66.3	66	59.9									Cowpea AMF- R+	5	2	66.3			Cowpea AMF- R+	5	2	66			Cowpea AMF- R+	5	2	59.9
Cowpea AMF- R+	5	2	61.7	65	67.1	66.9	58.7									Cowpea AMF- R+	5	2	67.1			Cowpea AMF- R+	5	2	66.9			Cowpea AMF- R+	5	2	58.7
Cowpea AMF- R+	5	2	61	65.2	66.4	66.3	59									Cowpea AMF- R+	5	2	66.4			Cowpea AMF- R+	5	2	66.3			Cowpea AMF- R+	5	2	59
Cowpea AMF- R-	1	3	68.6	63.9	71.2	55	58.2									Cowpea AMF- R-	1	3	71.2			Cowpea AMF- R-	1	3	55			Cowpea AMF- R-	1	3	58.2
Cowpea AMF- R-	1	3	68	63	71.5	55.3	59.3									Cowpea AMF- R-	1	3	71.5			Cowpea AMF- R-	1	3	55.3			Cowpea AMF- R-	1	3	59.3
Cowpea AMF- R-	1	3	68	63.4	71.5	55.2	57.7									Cowpea AMF- R-	1	3	71.5			Cowpea AMF- R-	1	3	55.2			Cowpea AMF- R-	1	3	57.7
Cowpea AMF- R-	2	3	68.2	60.2	64.5	57.4	78.3									Cowpea AMF- R-	2	3	64.5			Cowpea AMF- R-	2	3	57.4			Cowpea AMF- R-	2	3	78.3
Cowpea AMF- R-	2	3	68	60.4	65	58.3	79.6									Cowpea AMF- R-	2	3	65			Cowpea AMF- R-	2	3	58.3			Cowpea AMF- R-	2	3	79.6
Cowpea AMF- R-	2	3	68.1	60	64.7	57.3	79.4									Cowpea AMF- R-	2	3	64.7			Cowpea AMF- R-	2	3	57.3			Cowpea AMF- R-	2	3	79.4
Cowpea AMF- R-	3	3	71.2	61.3	67.3	55.2	38.9									Cowpea AMF- R-	3	3	67.3			Cowpea AMF- R-	3	3	55.2			Cowpea AMF- R-	3	3	38.9
Cowpea AMF- R-	3	3	71.4	61.7	66.9	55.6	41									Cowpea AMF- R-	3	3	66.9			Cowpea AMF- R-	3	3	55.6			Cowpea AMF- R-	3	3	41
Cowpea AMF- R-	3	3	71.9	60.9	66.5	55.4	39.8									Cowpea AMF- R-	3	3	66.5			Cowpea AMF- R-	3	3	55.4			Cowpea AMF- R-	3	3	39.8
Cowpea AMF- R-	4	3	74	60.2	69.7	54.2	48.2									Cowpea AMF- R-	4	3	69.7			Cowpea AMF- R-	4	3	54.2			Cowpea AMF- R-	4	3	48.2
Cowpea AMF- R-	4	3	74.9	60	71.7	54.3	48									Cowpea AMF- R-	4	3	71.7			Cowpea AMF- R-	4	3	54.3			Cowpea AMF- R-	4	3	48
Cowpea AMF- R-	4	3	74.3	60.4	70.2	54.7	47.9									Cowpea AMF- R-	4	3	70.2			Cowpea AMF- R-	4	3	54.7			Cowpea AMF- R-	4	3	47.9
Cowpea AMF- R-	5	3	61.8	61.2	66.2	57.2	43.8									Cowpea AMF- R-	5	3	66.2			Cowpea AMF- R-	5	3	57.2			Cowpea AMF- R-	5	3	43.8
Cowpea AMF- R-	5	3	61.7	61	66.9	57.3	43.2									Cowpea AMF- R-	5	3	66.9			Cowpea AMF- R-	5	3	57.3			Cowpea AMF- R-	5	3	43.2
Cowpea AMF- R-	5	3	61.9	61.5	66.2	57.1	44.4									Cowpea AMF- R-	5	3	66.2			Cowpea AMF- R-	5	3	57.1			Cowpea AMF- R-	5	3	44.4
Lablab AMF+ R+	1	3	51.2	48.3	52.3	44.1	43.8									Lablab AMF+ R+	1	3	52.3			Lablab AMF+ R+	1	3	44.1			Lablab AMF+ R+	1	3	43.8
Lablab AMF+ R+	1	3	51.4	48	52	44.3	43.5									Lablab AMF+ R+	1	3	52			Lablab AMF+ R+	1	3	44.3			Lablab AMF+ R+	1	3	43.5
Lablab AMF+ R+	1	3	52.1	48	52.4	44.2	44.4									Lablab AMF+ R+	1	3	52.4			Lablab AMF+ R+	1	3	44.2			Lablab AMF+ R+	1	3	44.4
Lablab AMF+ R+	2	3	54.6	50.2	54.9	44.3	42.7									Lablab AMF+ R+	2	3	54.9			Lablab AMF+ R+	2	3	44.3			Lablab AMF+ R+	2	3	42.7
Lablab AMF+ R+	2	3	54.5	50.6	55	44	41.7									Lablab AMF+ R+	2	3	55			Lablab AMF+ R+	2	3	44			Lablab AMF+ R+	2	3	41.7
Lablab AMF+ R+	2	3	54.8	50	55.5	44.7	43.2									Lablab AMF+ R+	2	3	55.5			Lablab AMF+ R+	2	3	44.7			Lablab AMF+ R+	2	3	43.2
Lablab AMF+ R+	3	3	51.8	50.1	48.7	43.6	46.8									Lablab AMF+ R+	3	3	48.7			Lablab AMF+ R+	3	3	43.6			Lablab AMF+ R+	3	3	46.8
Lablab AMF+ R+	3	3	51	50.1	49.4	43.2	47.7									Lablab AMF+ R+	3	3	49.4			Lablab AMF+ R+	3	3	43.2			Lablab AMF+ R+	3	3	47.7
Lablab AMF+ R+	3	3	51.5	50.7	49.2	43	45.1									Lablab AMF+ R+	3	3	49.2			Lablab AMF+ R+	3	3	43			Lablab AMF+ R+	3	3	45.1
Lablab AMF+ R+	4	3	54.3	49	50.5	44.4	48.6									Lablab AMF+ R+	4	3	50.5			Lablab AMF+ R+	4	3	44.4			Lablab AMF+ R+	4	3	48.6
Lablab AMF+ R+	4	3	54.8	49.5	50.4	44.1	47.8									Lablab AMF+ R+	4	3	50.4			Lablab AMF+ R+	4	3	44.1			Lablab AMF+ R+	4	3	47.8
Lablab AMF+ R+	4	3	54.2	49.7	50.6	44.8	48.2									Lablab AMF+ R+	4	3	50.6			Lablab AMF+ R+	4	3	44.8			Lablab AMF+ R+	4	3	48.2
Lablab AMF+ R+	5	3	54.7	47.3	57.8	44.3	46.1									Lablab AMF+ R+	5	3	57.8			Lablab AMF+ R+	5	3	44.3			Lablab AMF+ R+	5	3	46.1
Lablab AMF+ R+	5	3	54.5	46.9	58.3	44	46.3									Lablab AMF+ R+	5	3	58.3			Lablab AMF+ R+	5	3	44			Lablab AMF+ R+	5	3	46.3
Lablab AMF+ R+	5	3	54.8	47.1	57.3	44	55.6									Lablab AMF+ R+	5	3	57.3			Lablab AMF+ R+	5	3	44			Lablab AMF+ R+	5	3	55.6
Mucuna AMF- R+	1	3	55.8	47.4	56.8	33.6	56									Mucuna AMF- R+	1	3	56.8			Mucuna AMF- R+	1	3	33.6			Mucuna AMF- R+	1	3	56
Mucuna AMF- R+	1	3	55	47.2	57.4	33.5	57.5									Mucuna AMF- R+	1	3	57.4			Mucuna AMF- R+	1	3	33.5			Mucuna AMF- R+	1	3	57.5
Mucuna AMF- R+	1	3	55.3	47.2	58.8	33.2	53.7									Mucuna AMF- R+	1	3	58.8			Mucuna AMF- R+	1	3	33.2			Mucuna AMF- R+	1	3	53.7
Mucuna AMF- R+	2	3	57.7	50.6	49.4	34	53									Mucuna AMF- R+	2	3	49.4			Mucuna AMF- R+	2	3	34			Mucuna AMF- R+	2	3	53
Mucuna AMF- R+	2	3	57	50.4	49.5	34.2	52									Mucuna AMF- R+	2	3	49.5			Mucuna AMF- R+	2	3	34.2			Mucuna AMF- R+	2	3	52
Mucuna AMF- R+	2	3	57.3	50.2	48.9	34.7	73.5									Mucuna AMF- R+	2	3	48.9			Mucuna AMF- R+	2	3	34.7			Mucuna AMF- R+	2	3	73.5
Mucuna AMF- R+	3	3	50.8	42.6	42	35.4	68.9									Mucuna AMF- R+	3	3	42			Mucuna AMF- R+	3	3	35.4			Mucuna AMF- R+	3	3	68.9
Mucuna AMF- R+	3	3	50.4	42.6	42.5	35.2	70.8									Mucuna AMF- R+	3	3	42.5			Mucuna AMF- R+	3	3	35.2			Mucuna AMF- R+	3	3	70.8
Mucuna AMF- R+	3	3	50.9	42.1	42	35	66									Mucuna AMF- R+	3	3	42			Mucuna AMF- R+	3	3	35			Mucuna AMF- R+	3	3	66
Mucuna AMF- R+	4	3	53.6	40.7	51.6	38.6	65.7									Mucuna AMF- R+	4	3	51.6			Mucuna AMF- R+	4	3	38.6			Mucuna AMF- R+	4	3	65.7
Mucuna AMF- R+	4	3	53	40.4	51.2	38	66.1									Mucuna AMF- R+	4	3	51.2			Mucuna AMF- R+	4	3	38			Mucuna AMF- R+	4	3	66.1
Mucuna AMF- R+	4	3	53.4	40.2	52	38.2	53.9									Mucuna AMF- R+	4	3	52			Mucuna AMF- R+	4	3	38.2			Mucuna AMF- R+	4	3	53.9
Mucuna AMF- R+	5	3	55.9	41.2	51	33.2	56.2									Mucuna AMF- R+	5	3	51			Mucuna AMF- R+	5	3	33.2			Mucuna AMF- R+	5	3	56.2
Mucuna AMF- R+	5	3	56.8	41.5	51.2	33.6	55.2									Mucuna AMF- R+	5	3	51.2			Mucuna AMF- R+	5	3	33.6			Mucuna AMF- R+	5	3	55.2
Mucuna AMF- R+	5	3	55.7	41	51.1	33.2	67									Mucuna AMF- R+	5	3	51.1			Mucuna AMF- R+	5	3	33.2			Mucuna AMF- R+	5	3	67
Cowpea AMF+ R-	1	3	67.3	58.6	68.2	72.1	66.4									Cowpea AMF+ R-	1	3	68.2			Cowpea AMF+ R-	1	3	72.1			Cowpea AMF+ R-	1	3	66.4
Cowpea AMF+ R-	1	3	67.6	58.4	68.8	72	67.2									Cowpea AMF+ R-	1	3	68.8			Cowpea AMF+ R-	1	3	72			Cowpea AMF+ R-	1	3	67.2
Cowpea AMF+ R-	1	3	67.1	59	68	72.5	66.8									Cowpea AMF+ R-	1	3	68			Cowpea AMF+ R-	1	3	72.5			Cowpea AMF+ R-	1	3	66.8
Cowpea AMF+ R-	2	3	66.4	56.2	63.8	78	67.2									Cowpea AMF+ R-	2	3	63.8			Cowpea AMF+ R-	2	3	78			Cowpea AMF+ R-	2	3	67.2
Cowpea AMF+ R-	2	3	66	56.1	62.8	78.2	67.5									Cowpea AMF+ R-	2	3	62.8			Cowpea AMF+ R-	2	3	78.2			Cowpea AMF+ R-	2	3	67.5
Cowpea AMF+ R-	2	3	66.3	56.7	63.3	77.9	53.4									Cowpea AMF+ R-	2	3	63.3			Cowpea AMF+ R-	2	3	77.9			Cowpea AMF+ R-	2	3	53.4
Cowpea AMF+ R-	3	3	61.1	62	75.6	73.2	53.2									Cowpea AMF+ R-	3	3	75.6			Cowpea AMF+ R-	3	3	73.2			Cowpea AMF+ R-	3	3	53.2
Cowpea AMF+ R-	3	3	61.7	62.1	75	73.4	54.4									Cowpea AMF+ R-	3	3	75			Cowpea AMF+ R-	3	3	73.4			Cowpea AMF+ R-	3	3	54.4
Cowpea AMF+ R-	3	3	61.9	62.7	74.8	73	38.4									Cowpea AMF+ R-	3	3	74.8			Cowpea AMF+ R-	3	3	73			Cowpea AMF+ R-	3	3	38.4
Cowpea AMF+ R-	4	3	64.7	65.5	77.6	70.1	37.2									Cowpea AMF+ R-	4	3	77.6			Cowpea AMF+ R-	4	3	70.1			Cowpea AMF+ R-	4	3	37.2
Cowpea AMF+ R-	4	3	64.3	65	77	70.4	39.8									Cowpea AMF+ R-	4	3	77			Cowpea AMF+ R-	4	3	70.4			Cowpea AMF+ R-	4	3	39.8
Cowpea AMF+ R-	4	3	64.8	65.3	76.9	70.3	53.7									Cowpea AMF+ R-	4	3	76.9			Cowpea AMF+ R-	4	3	70.3			Cowpea AMF+ R-	4	3	53.7
Cowpea AMF+ R-	5	3	60.8	61.3	61	71.2	51.7									Cowpea AMF+ R-	5	3	61			Cowpea AMF+ R-	5	3	71.2			Cowpea AMF+ R-	5	3	51.7
Cowpea AMF+ R-	5	3	60.4	61	60.9	71	53.5									Cowpea AMF+ R-	5	3	60.9			Cowpea AMF+ R-	5	3	71			Cowpea AMF+ R-	5	3	53.5
Cowpea AMF+ R-	5	3	60.7	61.8	60.5	71.1	47.7									Cowpea AMF+ R-	5	3	60.5			Cowpea AMF+ R-	5	3	71.1			Cowpea AMF+ R-	5	3	47.7
Lablab AMF- R+	1	3	53.7	40.2	49.3	40.8	46.7									Lablab AMF- R+	1	3	49.3			Lablab AMF- R+	1	3	40.8			Lablab AMF- R+	1	3	46.7
Lablab AMF- R+	1	3	53.8	40.9	49.5	41.5	47									Lablab AMF- R+	1	3	49.5			Lablab AMF- R+	1	3	41.5			Lablab AMF- R+	1	3	47
Lablab AMF- R+	1	3	53.1	41	48.8	40.6	56.7									Lablab AMF- R+	1	3	48.8			Lablab AMF- R+	1	3	40.6			Lablab AMF- R+	1	3	56.7
Lablab AMF- R+	2	3	54	47.1	48.5	54.1	56									Lablab AMF- R+	2	3	48.5			Lablab AMF- R+	2	3	54.1			Lablab AMF- R+	2	3	56
Lablab AMF- R+	2	3	54.5	47	46.8	53.2	56.5									Lablab AMF- R+	2	3	46.8			Lablab AMF- R+	2	3	53.2			Lablab AMF- R+	2	3	56.5
Lablab AMF- R+	2	3	54.1	47.5	48	53	56.4									Lablab AMF- R+	2	3	48			Lablab AMF- R+	2	3	53			Lablab AMF- R+	2	3	56.4
Lablab AMF- R+	3	3	46.3	49.9	53.9	43.8	56									Lablab AMF- R+	3	3	53.9			Lablab AMF- R+	3	3	43.8			Lablab AMF- R+	3	3	56
Lablab AMF- R+	3	3	46.1	49.3	53	43.2	56.4									Lablab AMF- R+	3	3	53			Lablab AMF- R+	3	3	43.2			Lablab AMF- R+	3	3	56.4
Lablab AMF- R+	3	3	46.7	49.2	53.9	43.8	43.3									Lablab AMF- R+	3	3	53.9			Lablab AMF- R+	3	3	43.8			Lablab AMF- R+	3	3	43.3
Lablab AMF- R+	4	3	45.9	47.7	50.9	41.3	43.5									Lablab AMF- R+	4	3	50.9			Lablab AMF- R+	4	3	41.3			Lablab AMF- R+	4	3	43.5
Lablab AMF- R+	4	3	45.1	47.1	50.3	40.3	43									Lablab AMF- R+	4	3	50.3			Lablab AMF- R+	4	3	40.3			Lablab AMF- R+	4	3	43
Lablab AMF- R+	4	3	45.3	46.1	50.4	41.2	48.5									Lablab AMF- R+	4	3	50.4			Lablab AMF- R+	4	3	41.2			Lablab AMF- R+	4	3	48.5
Lablab AMF- R+	5	3	58.8	49.5	55.1	42.9	49.5									Lablab AMF- R+	5	3	55.1			Lablab AMF- R+	5	3	42.9			Lablab AMF- R+	5	3	49.5
Lablab AMF- R+	5	3	58.1	49.3	54.4	42	48.5									Lablab AMF- R+	5	3	54.4			Lablab AMF- R+	5	3	42			Lablab AMF- R+	5	3	48.5
Lablab AMF- R+	5	3	58.3	49.5	55	42.6	48.9									Lablab AMF- R+	5	3	55			Lablab AMF- R+	5	3	42.6			Lablab AMF- R+	5	3	48.9
Mucuna AMF+ R-	1	3	58.2	46.7	52.8	48.3	48.9									Mucuna AMF+ R-	1	3	52.8			Mucuna AMF+ R-	1	3	48.3			Mucuna AMF+ R-	1	3	48.9
Mucuna AMF+ R-	1	3	57.9	46.8	52.4	48.7	46.1									Mucuna AMF+ R-	1	3	52.4			Mucuna AMF+ R-	1	3	48.7			Mucuna AMF+ R-	1	3	46.1
Mucuna AMF+ R-	1	3	57.2	47	52	48.5	42.2									Mucuna AMF+ R-	1	3	52			Mucuna AMF+ R-	1	3	48.5			Mucuna AMF+ R-	1	3	42.2
Mucuna AMF+ R-	2	3	57.1	48.3	49.5	44.2	39.2									Mucuna AMF+ R-	2	3	49.5			Mucuna AMF+ R-	2	3	44.2			Mucuna AMF+ R-	2	3	39.2
Mucuna AMF+ R-	2	3	57	48.1	49.7	44.8	39.6									Mucuna AMF+ R-	2	3	49.7			Mucuna AMF+ R-	2	3	44.8			Mucuna AMF+ R-	2	3	39.6
Mucuna AMF+ R-	2	3	57.3	48.7	49	44.3	56.4									Mucuna AMF+ R-	2	3	49			Mucuna AMF+ R-	2	3	44.3			Mucuna AMF+ R-	2	3	56.4
Mucuna AMF+ R-	3	3	58.4	53.6	63.4	43.6	55.2									Mucuna AMF+ R-	3	3	63.4			Mucuna AMF+ R-	3	3	43.6			Mucuna AMF+ R-	3	3	55.2
Mucuna AMF+ R-	3	3	58.1	53.8	52.6	43.6	55.3									Mucuna AMF+ R-	3	3	52.6			Mucuna AMF+ R-	3	3	43.6			Mucuna AMF+ R-	3	3	55.3
Mucuna AMF+ R-	3	3	59.7	53.4	53	44	66.5									Mucuna AMF+ R-	3	3	53			Mucuna AMF+ R-	3	3	44			Mucuna AMF+ R-	3	3	66.5
Mucuna AMF+ R-	4	3	57.8	56.8	50.7	42.6	65.9									Mucuna AMF+ R-	4	3	50.7			Mucuna AMF+ R-	4	3	42.6			Mucuna AMF+ R-	4	3	65.9
Mucuna AMF+ R-	4	3	57.4	56	50.4	42.5	67.7									Mucuna AMF+ R-	4	3	50.4			Mucuna AMF+ R-	4	3	42.5			Mucuna AMF+ R-	4	3	67.7
Mucuna AMF+ R-	4	3	57.2	57	50	42.9	59.6									Mucuna AMF+ R-	4	3	50			Mucuna AMF+ R-	4	3	42.9			Mucuna AMF+ R-	4	3	59.6
Mucuna AMF+ R-	5	3	54.3	52.2	54	42	60.2									Mucuna AMF+ R-	5	3	54			Mucuna AMF+ R-	5	3	42			Mucuna AMF+ R-	5	3	60.2
Mucuna AMF+ R-	5	3	54.1	52	54.2	41.3	60									Mucuna AMF+ R-	5	3	54.2			Mucuna AMF+ R-	5	3	41.3			Mucuna AMF+ R-	5	3	60
Mucuna AMF+ R-	5	3	54.7	52.4	54	41.3	60.3									Mucuna AMF+ R-	5	3	54			Mucuna AMF+ R-	5	3	41.3			Mucuna AMF+ R-	5	3	60.3
Cowpea AMF- R+	1	3	60.1	64.8	65.1	61.6	59.8									Cowpea AMF- R+	1	3	65.1			Cowpea AMF- R+	1	3	61.6			Cowpea AMF- R+	1	3	59.8
Cowpea AMF- R+	1	3	60.3	65.2	65.3	60.1	57.9									Cowpea AMF- R+	1	3	65.3			Cowpea AMF- R+	1	3	60.1			Cowpea AMF- R+	1	3	57.9
Cowpea AMF- R+	1	3	60.7	65	64.8	61	54.5									Cowpea AMF- R+	1	3	64.8			Cowpea AMF- R+	1	3	61			Cowpea AMF- R+	1	3	54.5
Cowpea AMF- R+	2	3	61.4	61.2	56.9	59.8	55.3									Cowpea AMF- R+	2	3	56.9			Cowpea AMF- R+	2	3	59.8			Cowpea AMF- R+	2	3	55.3
Cowpea AMF- R+	2	3	61.7	62	57	59.4	54.9									Cowpea AMF- R+	2	3	57			Cowpea AMF- R+	2	3	59.4			Cowpea AMF- R+	2	3	54.9
Cowpea AMF- R+	2	3	60.9	61.5	56.2	59.3	44.2									Cowpea AMF- R+	2	3	56.2			Cowpea AMF- R+	2	3	59.3			Cowpea AMF- R+	2	3	44.2
Cowpea AMF- R+	3	3	60.8	62.8	60.2	57.3	43.2									Cowpea AMF- R+	3	3	60.2			Cowpea AMF- R+	3	3	57.3			Cowpea AMF- R+	3	3	43.2
Cowpea AMF- R+	3	3	60.4	63.4	60.3	57.2	44.5									Cowpea AMF- R+	3	3	60.3			Cowpea AMF- R+	3	3	57.2			Cowpea AMF- R+	3	3	44.5
Cowpea AMF- R+	3	3	60.9	62.1	60	57.3	48.4									Cowpea AMF- R+	3	3	60			Cowpea AMF- R+	3	3	57.3			Cowpea AMF- R+	3	3	48.4
Cowpea AMF- R+	4	3	61.4	60.2	65.9	58.6	47.6									Cowpea AMF- R+	4	3	65.9			Cowpea AMF- R+	4	3	58.6			Cowpea AMF- R+	4	3	47.6
Cowpea AMF- R+	4	3	61.7	60.8	66.9	58.2	48.1									Cowpea AMF- R+	4	3	66.9			Cowpea AMF- R+	4	3	58.2			Cowpea AMF- R+	4	3	48.1
Cowpea AMF- R+	4	3	60.1	60.1	66.3	58.3	51.4									Cowpea AMF- R+	4	3	66.3			Cowpea AMF- R+	4	3	58.3			Cowpea AMF- R+	4	3	51.4
Cowpea AMF- R+	5	3	62.4	60.2	65.2	61.3	52.6									Cowpea AMF- R+	5	3	65.2			Cowpea AMF- R+	5	3	61.3			Cowpea AMF- R+	5	3	52.6
Cowpea AMF- R+	5	3	62	60.5	65	61.2	52.4									Cowpea AMF- R+	5	3	65			Cowpea AMF- R+	5	3	61.2			Cowpea AMF- R+	5	3	52.4
Cowpea AMF- R+	5	3	62.3	60.4	66.3	61.4	35.5									Cowpea AMF- R+	5	3	66.3			Cowpea AMF- R+	5	3	61.4			Cowpea AMF- R+	5	3	35.5
Lablab AMF+ R-	1	3	54.3	45.8	48.6	46.5	35.7									Lablab AMF+ R-	1	3	48.6			Lablab AMF+ R-	1	3	46.5			Lablab AMF+ R-	1	3	35.7
Lablab AMF+ R-	1	3	55.9	45.9	47.4	46.8	37.9									Lablab AMF+ R-	1	3	47.4			Lablab AMF+ R-	1	3	46.8			Lablab AMF+ R-	1	3	37.9
Lablab AMF+ R-	1	3	54.6	45.3	48.5	46.2	45.5									Lablab AMF+ R-	1	3	48.5			Lablab AMF+ R-	1	3	46.2			Lablab AMF+ R-	1	3	45.5
Lablab AMF+ R-	2	3	55.6	50.9	48.7	44	46									Lablab AMF+ R-	2	3	48.7			Lablab AMF+ R-	2	3	44			Lablab AMF+ R-	2	3	46
Lablab AMF+ R-	2	3	55.1	50.2	48	44.5	47.3									Lablab AMF+ R-	2	3	48			Lablab AMF+ R-	2	3	44.5			Lablab AMF+ R-	2	3	47.3
Lablab AMF+ R-	2	3	55.8	50.4	48.3	43.4	48									Lablab AMF+ R-	2	3	48.3			Lablab AMF+ R-	2	3	43.4			Lablab AMF+ R-	2	3	48
Lablab AMF+ R-	3	3	54.3	50.6	45	42.6	48.5									Lablab AMF+ R-	3	3	45			Lablab AMF+ R-	3	3	42.6			Lablab AMF+ R-	3	3	48.5
Lablab AMF+ R-	3	3	54.1	50.5	45	42.3	48.7									Lablab AMF+ R-	3	3	45			Lablab AMF+ R-	3	3	42.3			Lablab AMF+ R-	3	3	48.7
Lablab AMF+ R-	3	3	54.9	51.6	45.2	43	51.7									Lablab AMF+ R-	3	3	45.2			Lablab AMF+ R-	3	3	43			Lablab AMF+ R-	3	3	51.7
Lablab AMF+ R-	4	3	52.4	47.8	58.6	45.2	49.8									Lablab AMF+ R-	4	3	58.6			Lablab AMF+ R-	4	3	45.2			Lablab AMF+ R-	4	3	49.8
Lablab AMF+ R-	4	3	52.6	47.2	58	44.9	50.8									Lablab AMF+ R-	4	3	58			Lablab AMF+ R-	4	3	44.9			Lablab AMF+ R-	4	3	50.8
Lablab AMF+ R-	4	3	52.7	47.1	58.4	44.7	45.8									Lablab AMF+ R-	4	3	58.4			Lablab AMF+ R-	4	3	44.7			Lablab AMF+ R-	4	3	45.8
Lablab AMF+ R-	5	3	53.7	49.5	49.8	41	45									Lablab AMF+ R-	5	3	49.8			Lablab AMF+ R-	5	3	41			Lablab AMF+ R-	5	3	45
Lablab AMF+ R-	5	3	52.9	49	49.6	42	46.9									Lablab AMF+ R-	5	3	49.6			Lablab AMF+ R-	5	3	42			Lablab AMF+ R-	5	3	46.9
Lablab AMF+ R-	5	3	52.1	48.9	49.9	41.9	48									Lablab AMF+ R-	5	3	49.9			Lablab AMF+ R-	5	3	41.9			Lablab AMF+ R-	5	3	48
Mucuna AMF- R+	1	3	52.6	52.8	52.3	36	49									Mucuna AMF- R+	1	3	52.3			Mucuna AMF- R+	1	3	36			Mucuna AMF- R+	1	3	49
Mucuna AMF- R+	1	3	52.4	52.2	51.9	36.2	48.6									Mucuna AMF- R+	1	3	51.9			Mucuna AMF- R+	1	3	36.2			Mucuna AMF- R+	1	3	48.6
Mucuna AMF- R+	1	3	52.7	52.9	52.3	36.3	48.5									Mucuna AMF- R+	1	3	52.3			Mucuna AMF- R+	1	3	36.3			Mucuna AMF- R+	1	3	48.5
Mucuna AMF- R+	2	3	55.9	43.5	44.3	36.2	48.5									Mucuna AMF- R+	2	3	44.3			Mucuna AMF- R+	2	3	36.2			Mucuna AMF- R+	2	3	48.5
Mucuna AMF- R+	2	3	55.7	43	43.8	36	47.9									Mucuna AMF- R+	2	3	43.8			Mucuna AMF- R+	2	3	36			Mucuna AMF- R+	2	3	47.9
Mucuna AMF- R+	2	3	56.4	43.1	43.5	36	66.6									Mucuna AMF- R+	2	3	43.5			Mucuna AMF- R+	2	3	36			Mucuna AMF- R+	2	3	66.6
Mucuna AMF- R+	3	3	52.4	43.4	52.2	36.4	67.6									Mucuna AMF- R+	3	3	52.2			Mucuna AMF- R+	3	3	36.4			Mucuna AMF- R+	3	3	67.6
Mucuna AMF- R+	3	3	52.6	43	53	35.8	66.4									Mucuna AMF- R+	3	3	53			Mucuna AMF- R+	3	3	35.8			Mucuna AMF- R+	3	3	66.4
Mucuna AMF- R+	3	3	52.4	43	52.4	35.9	66									Mucuna AMF- R+	3	3	52.4			Mucuna AMF- R+	3	3	35.9			Mucuna AMF- R+	3	3	66
Mucuna AMF- R+	4	3	56.1	51.9	49.7	36.7	65.3									Mucuna AMF- R+	4	3	49.7			Mucuna AMF- R+	4	3	36.7			Mucuna AMF- R+	4	3	65.3
Mucuna AMF- R+	4	3	56.3	51.5	48.9	35.9	66.7									Mucuna AMF- R+	4	3	48.9			Mucuna AMF- R+	4	3	35.9			Mucuna AMF- R+	4	3	66.7
Mucuna AMF- R+	4	3	56.4	51.7	48.6	36	66.3									Mucuna AMF- R+	4	3	48.6			Mucuna AMF- R+	4	3	36			Mucuna AMF- R+	4	3	66.3
Mucuna AMF- R+	5	3	54.7	53.4	42.3	39	65.8									Mucuna AMF- R+	5	3	42.3			Mucuna AMF- R+	5	3	39			Mucuna AMF- R+	5	3	65.8
Mucuna AMF- R+	5	3	54.6	53	42	38.9	66									Mucuna AMF- R+	5	3	42			Mucuna AMF- R+	5	3	38.9			Mucuna AMF- R+	5	3	66
Mucuna AMF- R+	5	3	54.3	53.4	42.4	38.1	60.8									Mucuna AMF- R+	5	3	42.4			Mucuna AMF- R+	5	3	38.1			Mucuna AMF- R+	5	3	60.8
Cowpea AMF+ R+	1	3	60.3	72.1	77.7	71.6	60.5									Cowpea AMF+ R+	1	3	77.7			Cowpea AMF+ R+	1	3	71.6			Cowpea AMF+ R+	1	3	60.5
Cowpea AMF+ R+	1	3	60.7	71.9	77.5	72.6	61.1									Cowpea AMF+ R+	1	3	77.5			Cowpea AMF+ R+	1	3	72.6			Cowpea AMF+ R+	1	3	61.1
Cowpea AMF+ R+	1	3	60.8	71.8	77.7	71.5	70									Cowpea AMF+ R+	1	3	77.7			Cowpea AMF+ R+	1	3	71.5			Cowpea AMF+ R+	1	3	70
Cowpea AMF+ R+	2	3	67.6	66.5	67.7	70.2	70.9									Cowpea AMF+ R+	2	3	67.7			Cowpea AMF+ R+	2	3	70.2			Cowpea AMF+ R+	2	3	70.9
Cowpea AMF+ R+	2	3	67	66.7	67.3	70.5	71.2									Cowpea AMF+ R+	2	3	67.3			Cowpea AMF+ R+	2	3	70.5			Cowpea AMF+ R+	2	3	71.2
Cowpea AMF+ R+	2	3	67.2	66.2	67.8	70.2	43.2									Cowpea AMF+ R+	2	3	67.8			Cowpea AMF+ R+	2	3	70.2			Cowpea AMF+ R+	2	3	43.2
Cowpea AMF+ R+	3	3	61.3	70.2	74.9	69.3	43.4									Cowpea AMF+ R+	3	3	74.9			Cowpea AMF+ R+	3	3	69.3			Cowpea AMF+ R+	3	3	43.4
Cowpea AMF+ R+	3	3	60.2	70.3	75	69	43.9									Cowpea AMF+ R+	3	3	75			Cowpea AMF+ R+	3	3	69			Cowpea AMF+ R+	3	3	43.9
Cowpea AMF+ R+	3	3	60.4	70.1	74.6	69	45.8									Cowpea AMF+ R+	3	3	74.6			Cowpea AMF+ R+	3	3	69			Cowpea AMF+ R+	3	3	45.8
Cowpea AMF+ R+	4	3	65.8	68.2	66.3	69.9	45.8									Cowpea AMF+ R+	4	3	66.3			Cowpea AMF+ R+	4	3	69.9			Cowpea AMF+ R+	4	3	45.8
Cowpea AMF+ R+	4	3	65.9	68.1	66.5	70.2	46.8									Cowpea AMF+ R+	4	3	66.5			Cowpea AMF+ R+	4	3	70.2			Cowpea AMF+ R+	4	3	46.8
Cowpea AMF+ R+	4	3	65.7	68	64.4	70	44.2									Cowpea AMF+ R+	4	3	64.4			Cowpea AMF+ R+	4	3	70			Cowpea AMF+ R+	4	3	44.2
Cowpea AMF+ R+	5	3	65.4	65.3	65.5	68.3	45.2									Cowpea AMF+ R+	5	3	65.5			Cowpea AMF+ R+	5	3	68.3			Cowpea AMF+ R+	5	3	45.2
Cowpea AMF+ R+	5	3	66.1	65	65.7	69	45.5									Cowpea AMF+ R+	5	3	65.7			Cowpea AMF+ R+	5	3	69			Cowpea AMF+ R+	5	3	45.5
Cowpea AMF+ R+	5	3	66	65	64.8	69	41.1									Cowpea AMF+ R+	5	3	64.8			Cowpea AMF+ R+	5	3	69			Cowpea AMF+ R+	5	3	41.1
Lablab AMF- R-	1	3	56.7	45.2	52.7	36.6	40.1									Lablab AMF- R-	1	3	52.7			Lablab AMF- R-	1	3	36.6			Lablab AMF- R-	1	3	40.1
Lablab AMF- R-	1	3	56.4	45	52.6	36	39.7									Lablab AMF- R-	1	3	52.6			Lablab AMF- R-	1	3	36			Lablab AMF- R-	1	3	39.7
Lablab AMF- R-	1	3	56.2	45	52	36.5	55.3									Lablab AMF- R-	1	3	52			Lablab AMF- R-	1	3	36.5			Lablab AMF- R-	1	3	55.3
Lablab AMF- R-	2	3	45.6	45.8	503	38.4	56.7									Lablab AMF- R-	2	3	503			Lablab AMF- R-	2	3	38.4			Lablab AMF- R-	2	3	56.7
Lablab AMF- R-	2	3	45.3	45.3	50.8	38	55.9									Lablab AMF- R-	2	3	50.8			Lablab AMF- R-	2	3	38			Lablab AMF- R-	2	3	55.9
Lablab AMF- R-	2	3	45.8	45.1	50.1	38.2	43.8									Lablab AMF- R-	2	3	50.1			Lablab AMF- R-	2	3	38.2			Lablab AMF- R-	2	3	43.8
Lablab AMF- R-	3	3	48.1	45.4	42.3	40.5	43.3									Lablab AMF- R-	3	3	42.3			Lablab AMF- R-	3	3	40.5			Lablab AMF- R-	3	3	43.3
Lablab AMF- R-	3	3	48.6	48.8	42.3	40.3	41.3									Lablab AMF- R-	3	3	42.3			Lablab AMF- R-	3	3	40.3			Lablab AMF- R-	3	3	41.3
Lablab AMF- R-	3	3	48.3	48.9	42.1	40.3	46.2									Lablab AMF- R-	3	3	42.1			Lablab AMF- R-	3	3	40.3			Lablab AMF- R-	3	3	46.2
Lablab AMF- R-	4	3	54.6	48	43.7	36.2	46.6									Lablab AMF- R-	4	3	43.7			Lablab AMF- R-	4	3	36.2			Lablab AMF- R-	4	3	46.6
Lablab AMF- R-	4	3	54.3	47.2	44.1	36.8	47.2									Lablab AMF- R-	4	3	44.1			Lablab AMF- R-	4	3	36.8			Lablab AMF- R-	4	3	47.2
Lablab AMF- R-	4	3	54	47.1	43.7	36.4	48.6									Lablab AMF- R-	4	3	43.7			Lablab AMF- R-	4	3	36.4			Lablab AMF- R-	4	3	48.6
Lablab AMF- R-	5	3	55.7	47.2	50.9	39.5	46.9									Lablab AMF- R-	5	3	50.9			Lablab AMF- R-	5	3	39.5			Lablab AMF- R-	5	3	46.9
Lablab AMF- R-	5	3	55.1	45.9	50.8	39.5	47.3									Lablab AMF- R-	5	3	50.8			Lablab AMF- R-	5	3	39.5			Lablab AMF- R-	5	3	47.3
Lablab AMF- R-	5	3	55.8	45.2	50.7	39	47.8									Lablab AMF- R-	5	3	50.7			Lablab AMF- R-	5	3	39			Lablab AMF- R-	5	3	47.8
Mucuna AMF+ R+	1	3	47.8	51.3	53	40	50.4									Mucuna AMF+ R+	1	3	53			Mucuna AMF+ R+	1	3	24			Mucuna AMF+ R+	1	3	50.4
Mucuna AMF+ R+	1	3	47.8	51.2	53.3	43.2	48.9									Mucuna AMF+ R+	1	3	53.3			Mucuna AMF+ R+	1	3	43.2			Mucuna AMF+ R+	1	3	48.9
Mucuna AMF+ R+	1	3	47	51	53.2	43.2	66.5									Mucuna AMF+ R+	1	3	53.2			Mucuna AMF+ R+	1	3	43.2			Mucuna AMF+ R+	1	3	66.5
Mucuna AMF+ R+	2	3	43.3	54.3	58.3	43	64.8									Mucuna AMF+ R+	2	3	58.3			Mucuna AMF+ R+	2	3	43			Mucuna AMF+ R+	2	3	64.8
Mucuna AMF+ R+	2	3	43.9	54.2	57.4	41.2	64									Mucuna AMF+ R+	2	3	57.4			Mucuna AMF+ R+	2	3	41.2			Mucuna AMF+ R+	2	3	64
Mucuna AMF+ R+	2	3	43.1	54	57.6	41.5	46									Mucuna AMF+ R+	2	3	57.6			Mucuna AMF+ R+	2	3	41.5			Mucuna AMF+ R+	2	3	46
Mucuna AMF+ R+	3	3	44.1	45.8	55.3	41.8	47									Mucuna AMF+ R+	3	3	55.3			Mucuna AMF+ R+	3	3	41.8			Mucuna AMF+ R+	3	3	47
Mucuna AMF+ R+	3	3	45.5	45.6	56.2	40.6	46.3									Mucuna AMF+ R+	3	3	56.2			Mucuna AMF+ R+	3	3	40.6			Mucuna AMF+ R+	3	3	46.3
Mucuna AMF+ R+	3	3	44.8	45.1	55.7	40.4	46.4									Mucuna AMF+ R+	3	3	55.7			Mucuna AMF+ R+	3	3	40.4			Mucuna AMF+ R+	3	3	46.4
Mucuna AMF+ R+	4	3	45.6	43.8	48.1	40.6	46									Mucuna AMF+ R+	4	3	48.1			Mucuna AMF+ R+	4	3	40.6			Mucuna AMF+ R+	4	3	46
Mucuna AMF+ R+	4	3	45	43.5	48.5	42.3	45.6									Mucuna AMF+ R+	4	3	48.5			Mucuna AMF+ R+	4	3	42.3			Mucuna AMF+ R+	4	3	45.6
Mucuna AMF+ R+	4	3	45.3	43.1	84.3	42.3	51.5									Mucuna AMF+ R+	4	3	84.3			Mucuna AMF+ R+	4	3	42.3			Mucuna AMF+ R+	4	3	51.5
Mucuna AMF+ R+	5	3	49.6	43.2	57.6	40.2	51.6									Mucuna AMF+ R+	5	3	57.6			Mucuna AMF+ R+	5	3	40.2			Mucuna AMF+ R+	5	3	51.6
Mucuna AMF+ R+	5	3	49	43	57.4	40.5	50.8									Mucuna AMF+ R+	5	3	57.4			Mucuna AMF+ R+	5	3	40.5			Mucuna AMF+ R+	5	3	50.8
Mucuna AMF+ R+	5	3	48.6	43.7	57.3	40.3	45.4									Mucuna AMF+ R+	5	3	57.3			Mucuna AMF+ R+	5	3	40.3			Mucuna AMF+ R+	5	3	45.4
Mucuna AMF+ R+	1	4	56	40	55.1	42	43.4									Mucuna AMF+ R+	1	4	55.1			Mucuna AMF+ R+	1	4	42			Mucuna AMF+ R+	1	4	43.4
Mucuna AMF+ R+	1	4	56.3	40.1	55.3	42	43.3									Mucuna AMF+ R+	1	4	55.3			Mucuna AMF+ R+	1	4	42			Mucuna AMF+ R+	1	4	43.3
Mucuna AMF+ R+	1	4	57	40.7	55.4	42.7	47.4									Mucuna AMF+ R+	1	4	55.4			Mucuna AMF+ R+	1	4	42.7			Mucuna AMF+ R+	1	4	47.4
Mucuna AMF+ R+	2	4	52.6	52	52.3	43.6	48.4									Mucuna AMF+ R+	2	4	52.3			Mucuna AMF+ R+	2	4	43.6			Mucuna AMF+ R+	2	4	48.4
Mucuna AMF+ R+	2	4	52.7	52.3	52	43.2	49.9									Mucuna AMF+ R+	2	4	52			Mucuna AMF+ R+	2	4	43.2			Mucuna AMF+ R+	2	4	49.9
Mucuna AMF+ R+	2	4	52	52.4	52.3	43	70.5									Mucuna AMF+ R+	2	4	52.3			Mucuna AMF+ R+	2	4	43			Mucuna AMF+ R+	2	4	70.5
Mucuna AMF+ R+	3	4	54	45.7	51.5	42.5	70.7									Mucuna AMF+ R+	3	4	51.5			Mucuna AMF+ R+	3	4	42.5			Mucuna AMF+ R+	3	4	70.7
Mucuna AMF+ R+	3	4	54.2	45	51.4	42.3	71.8									Mucuna AMF+ R+	3	4	51.4			Mucuna AMF+ R+	3	4	42.3			Mucuna AMF+ R+	3	4	71.8
Mucuna AMF+ R+	3	4	54.2	45.7	51	43	69.2									Mucuna AMF+ R+	3	4	51			Mucuna AMF+ R+	3	4	43			Mucuna AMF+ R+	3	4	69.2
Mucuna AMF+ R+	4	4	54.6	48.2	50.8	45.2	68.8									Mucuna AMF+ R+	4	4	50.8			Mucuna AMF+ R+	4	4	45.2			Mucuna AMF+ R+	4	4	68.8
Mucuna AMF+ R+	4	4	54.5	48.6	50.4	45	68									Mucuna AMF+ R+	4	4	50.4			Mucuna AMF+ R+	4	4	45			Mucuna AMF+ R+	4	4	68
Mucuna AMF+ R+	4	4	54.9	48.1	50.7	45	63.8									Mucuna AMF+ R+	4	4	50.7			Mucuna AMF+ R+	4	4	45			Mucuna AMF+ R+	4	4	63.8
Mucuna AMF+ R+	5	4	53	40.6	52.6	43.6	64									Mucuna AMF+ R+	5	4	52.6			Mucuna AMF+ R+	5	4	43.6			Mucuna AMF+ R+	5	4	64
Mucuna AMF+ R+	5	4	52.8	40.2	52.4	43	63.9									Mucuna AMF+ R+	5	4	52.4			Mucuna AMF+ R+	5	4	43			Mucuna AMF+ R+	5	4	63.9
Mucuna AMF+ R+	5	4	53.7	40.7	52.7	435	69.5									Mucuna AMF+ R+	5	4	52.7			Mucuna AMF+ R+	5	4	435			Mucuna AMF+ R+	5	4	69.5
Cowpea AMF+ R-	1	4	62.9	59.2	62.3	61.6	68.5									Cowpea AMF+ R-	1	4	62.3			Cowpea AMF+ R-	1	4	61.6			Cowpea AMF+ R-	1	4	68.5
Cowpea AMF+ R-	1	4	62	59.1	62.7	62	69.4									Cowpea AMF+ R-	1	4	62.7			Cowpea AMF+ R-	1	4	62			Cowpea AMF+ R-	1	4	69.4
Cowpea AMF+ R-	1	4	62.3	59.4	62.7	62	69.7									Cowpea AMF+ R-	1	4	62.7			Cowpea AMF+ R-	1	4	62			Cowpea AMF+ R-	1	4	69.7
Cowpea AMF+ R-	2	4	68.5	54.4	63.3	60.3	68.7									Cowpea AMF+ R-	2	4	63.3			Cowpea AMF+ R-	2	4	60.3			Cowpea AMF+ R-	2	4	68.7
Cowpea AMF+ R-	2	4	68.1	54.9	63	60.4	67.3									Cowpea AMF+ R-	2	4	63			Cowpea AMF+ R-	2	4	60.4			Cowpea AMF+ R-	2	4	67.3
Cowpea AMF+ R-	2	4	68.3	54.8	63.1	60	42.8									Cowpea AMF+ R-	2	4	63.1			Cowpea AMF+ R-	2	4	60			Cowpea AMF+ R-	2	4	42.8
Cowpea AMF+ R-	3	4	69.3	53.2	68.8	59.3	42.4									Cowpea AMF+ R-	3	4	68.8			Cowpea AMF+ R-	3	4	59.3			Cowpea AMF+ R-	3	4	42.4
Cowpea AMF+ R-	3	4	69.1	53	68.3	59.8	43									Cowpea AMF+ R-	3	4	68.3			Cowpea AMF+ R-	3	4	59.8			Cowpea AMF+ R-	3	4	43
Cowpea AMF+ R-	3	4	69.5	53.4	68.4	59.3	45.9									Cowpea AMF+ R-	3	4	68.4			Cowpea AMF+ R-	3	4	59.3			Cowpea AMF+ R-	3	4	45.9
Cowpea AMF+ R-	4	4	64	54.9	52.1	58.3	46.2									Cowpea AMF+ R-	4	4	52.1			Cowpea AMF+ R-	4	4	58.3			Cowpea AMF+ R-	4	4	46.2
Cowpea AMF+ R-	4	4	63.4	54	52	58.3	44.8									Cowpea AMF+ R-	4	4	52			Cowpea AMF+ R-	4	4	58.3			Cowpea AMF+ R-	4	4	44.8
Cowpea AMF+ R-	4	4	63.5	54.3	52.4	58	54.5									Cowpea AMF+ R-	4	4	52.4			Cowpea AMF+ R-	4	4	58			Cowpea AMF+ R-	4	4	54.5
Cowpea AMF+ R-	5	4	65.1	57.1	60	61.4	55.5									Cowpea AMF+ R-	5	4	60			Cowpea AMF+ R-	5	4	61.4			Cowpea AMF+ R-	5	4	55.5
Cowpea AMF+ R-	5	4	64.1	57	60.3	62	53.9									Cowpea AMF+ R-	5	4	60.3			Cowpea AMF+ R-	5	4	62			Cowpea AMF+ R-	5	4	53.9
Cowpea AMF+ R-	5	4	65.7	57	60.2	62	47.8									Cowpea AMF+ R-	5	4	60.2			Cowpea AMF+ R-	5	4	62			Cowpea AMF+ R-	5	4	47.8
Lablab AMF- R+	1	4	47.8	50.4	53.4	36.8	48.2									Lablab AMF- R+	1	4	53.4			Lablab AMF- R+	1	4	36.8			Lablab AMF- R+	1	4	48.2
Lablab AMF- R+	1	4	47	50.9	53.6	36	49									Lablab AMF- R+	1	4	53.6			Lablab AMF- R+	1	4	36			Lablab AMF- R+	1	4	49
Lablab AMF- R+	1	4	46.8	50.6	53	36	46.8									Lablab AMF- R+	1	4	53			Lablab AMF- R+	1	4	36			Lablab AMF- R+	1	4	46.8
Lablab AMF- R+	2	4	55.6	45.6	49.1	37	48.2									Lablab AMF- R+	2	4	49.1			Lablab AMF- R+	2	4	37			Lablab AMF- R+	2	4	48.2
Lablab AMF- R+	2	4	55.3	45.2	49	37.7	46.1									Lablab AMF- R+	2	4	49			Lablab AMF- R+	2	4	37.7			Lablab AMF- R+	2	4	46.1
Lablab AMF- R+	2	4	55.7	45	49.4	37.2	56.2									Lablab AMF- R+	2	4	49.4			Lablab AMF- R+	2	4	37.2			Lablab AMF- R+	2	4	56.2
Lablab AMF- R+	3	4	53	51	49.4	40.7	56									Lablab AMF- R+	3	4	49.4			Lablab AMF- R+	3	4	40.7			Lablab AMF- R+	3	4	56
Lablab AMF- R+	3	4	53	51.3	49.7	40.8	56.8									Lablab AMF- R+	3	4	49.7			Lablab AMF- R+	3	4	40.8			Lablab AMF- R+	3	4	56.8
Lablab AMF- R+	3	4	53.3	51.4	49.4	40.3	48.8									Lablab AMF- R+	3	4	49.4			Lablab AMF- R+	3	4	40.3			Lablab AMF- R+	3	4	48.8
Lablab AMF- R+	4	4	52.6	52.6	52.8	37.4	47.5									Lablab AMF- R+	4	4	52.8			Lablab AMF- R+	4	4	37.4			Lablab AMF- R+	4	4	47.5
Lablab AMF- R+	4	4	52.7	52	52.3	38	48.3									Lablab AMF- R+	4	4	52.3			Lablab AMF- R+	4	4	38			Lablab AMF- R+	4	4	48.3
Lablab AMF- R+	4	4	52	52.7	52.5	38	45.5									Lablab AMF- R+	4	4	52.5			Lablab AMF- R+	4	4	38			Lablab AMF- R+	4	4	45.5
Lablab AMF- R+	5	4	51.2	47.5	51.1	37.4	45.8									Lablab AMF- R+	5	4	51.1			Lablab AMF- R+	5	4	37.4			Lablab AMF- R+	5	4	45.8
Lablab AMF- R+	5	4	51.4	47	51.4	37.5	46.3									Lablab AMF- R+	5	4	51.4			Lablab AMF- R+	5	4	37.5			Lablab AMF- R+	5	4	46.3
Lablab AMF- R+	5	4	51.6	47.7	51.3	37	54									Lablab AMF- R+	5	4	51.3			Lablab AMF- R+	5	4	37			Lablab AMF- R+	5	4	54
Mucuna AMF+ R-	1	4	47.1	38.5	50.3	34.2	53.8									Mucuna AMF+ R-	1	4	50.3			Mucuna AMF+ R-	1	4	34.2			Mucuna AMF+ R-	1	4	53.8
Mucuna AMF+ R-	1	4	46.6	38.6	50	34.5	53									Mucuna AMF+ R-	1	4	50			Mucuna AMF+ R-	1	4	34.5			Mucuna AMF+ R-	1	4	53
Mucuna AMF+ R-	1	4	47	38.1	50.4	34.2	49.2									Mucuna AMF+ R-	1	4	50.4			Mucuna AMF+ R-	1	4	34.2			Mucuna AMF+ R-	1	4	49.2
Mucuna AMF+ R-	2	4	51.2	40.2	55.7	35.3	47.3									Mucuna AMF+ R-	2	4	55.7			Mucuna AMF+ R-	2	4	35.3			Mucuna AMF+ R-	2	4	47.3
Mucuna AMF+ R-	2	4	51	40.2	55.4	34.8	45.2									Mucuna AMF+ R-	2	4	55.4			Mucuna AMF+ R-	2	4	34.8			Mucuna AMF+ R-	2	4	45.2
Mucuna AMF+ R-	2	4	51.4	40.7	55.9	38.9	67.2									Mucuna AMF+ R-	2	4	55.9			Mucuna AMF+ R-	2	4	38.9			Mucuna AMF+ R-	2	4	67.2
Mucuna AMF+ R-	3	4	51.3	43.7	50.2	33	65.3									Mucuna AMF+ R-	3	4	50.2			Mucuna AMF+ R-	3	4	33			Mucuna AMF+ R-	3	4	65.3
Mucuna AMF+ R-	3	4	51.4	43.8	50.6	33	64.8									Mucuna AMF+ R-	3	4	50.6			Mucuna AMF+ R-	3	4	33			Mucuna AMF+ R-	3	4	64.8
Mucuna AMF+ R-	3	4	51	42.8	50.4	32.9	68.4									Mucuna AMF+ R-	3	4	50.4			Mucuna AMF+ R-	3	4	32.9			Mucuna AMF+ R-	3	4	68.4
Mucuna AMF+ R-	4	4	51.9	51.5	49.6	33.3	68.3									Mucuna AMF+ R-	4	4	49.6			Mucuna AMF+ R-	4	4	33.3			Mucuna AMF+ R-	4	4	68.3
Mucuna AMF+ R-	4	4	51.4	51.4	48.9	33.6	69.3									Mucuna AMF+ R-	4	4	48.9			Mucuna AMF+ R-	4	4	33.6			Mucuna AMF+ R-	4	4	69.3
Mucuna AMF+ R-	4	4	51	51	48.7	33.6	60.9									Mucuna AMF+ R-	4	4	48.7			Mucuna AMF+ R-	4	4	33.6			Mucuna AMF+ R-	4	4	60.9
Mucuna AMF+ R-	5	4	50	46.1	54.3	36.8	61.2									Mucuna AMF+ R-	5	4	54.3			Mucuna AMF+ R-	5	4	36.8			Mucuna AMF+ R-	5	4	61.2
Mucuna AMF+ R-	5	4	506	46.8	54.7	37.8	62									Mucuna AMF+ R-	5	4	54.7			Mucuna AMF+ R-	5	4	37.8			Mucuna AMF+ R-	5	4	62
Mucuna AMF+ R-	5	4	50.4	46.4	54.2	37	58.7									Mucuna AMF+ R-	5	4	54.2			Mucuna AMF+ R-	5	4	37			Mucuna AMF+ R-	5	4	58.7
Cowpea AMF- R+	1	4	68.4	55.3	62.4	45.5	57.1									Cowpea AMF- R+	1	4	62.4			Cowpea AMF- R+	1	4	45.5			Cowpea AMF- R+	1	4	57.1
Cowpea AMF- R+	1	4	68.2	55.7	62.5	45.2	59.4									Cowpea AMF- R+	1	4	62.5			Cowpea AMF- R+	1	4	45.2			Cowpea AMF- R+	1	4	59.4
Cowpea AMF- R+	1	4	68.4	55.1	62.4	45.3	62.1									Cowpea AMF- R+	1	4	62.4			Cowpea AMF- R+	1	4	45.3			Cowpea AMF- R+	1	4	62.1
Cowpea AMF- R+	2	4	61.4	57.4	60.4	49.7	66.8									Cowpea AMF- R+	2	4	60.4			Cowpea AMF- R+	2	4	49.7			Cowpea AMF- R+	2	4	66.8
Cowpea AMF- R+	2	4	60.6	57	60	49.3	66.6									Cowpea AMF- R+	2	4	60			Cowpea AMF- R+	2	4	49.3			Cowpea AMF- R+	2	4	66.6
Cowpea AMF- R+	2	4	61	57.2	60.1	49.7	49.6									Cowpea AMF- R+	2	4	60.1			Cowpea AMF- R+	2	4	49.7			Cowpea AMF- R+	2	4	49.6
Cowpea AMF- R+	3	4	64.5	54.3	66.8	49.4	49.9									Cowpea AMF- R+	3	4	66.8			Cowpea AMF- R+	3	4	49.4			Cowpea AMF- R+	3	4	49.9
Cowpea AMF- R+	3	4	64	54	66.7	49.3	52.2									Cowpea AMF- R+	3	4	66.7			Cowpea AMF- R+	3	4	49.3			Cowpea AMF- R+	3	4	52.2
Cowpea AMF- R+	3	4	64.3	54.8	66.4	49.5	48.3									Cowpea AMF- R+	3	4	66.4			Cowpea AMF- R+	3	4	49.5			Cowpea AMF- R+	3	4	48.3
Cowpea AMF- R+	4	4	64.5	61.8	67.2	40.4	48.5									Cowpea AMF- R+	4	4	67.2			Cowpea AMF- R+	4	4	40.4			Cowpea AMF- R+	4	4	48.5
Cowpea AMF- R+	4	4	64.1	61	67.4	40.2	47.6									Cowpea AMF- R+	4	4	67.4			Cowpea AMF- R+	4	4	40.2			Cowpea AMF- R+	4	4	47.6
Cowpea AMF- R+	4	4	64.7	61.2	67.2	40.5	49									Cowpea AMF- R+	4	4	67.2			Cowpea AMF- R+	4	4	40.5			Cowpea AMF- R+	4	4	49
Cowpea AMF- R+	5	4	60.9	64.4	62.7	43.2	48.7									Cowpea AMF- R+	5	4	62.7			Cowpea AMF- R+	5	4	43.2			Cowpea AMF- R+	5	4	48.7
Cowpea AMF- R+	5	4	60.5	64.2	63.1	43	49.1									Cowpea AMF- R+	5	4	63.1			Cowpea AMF- R+	5	4	43			Cowpea AMF- R+	5	4	49.1
Cowpea AMF- R+	5	4	60	64.3	62.8	43.5	57.3									Cowpea AMF- R+	5	4	62.8			Cowpea AMF- R+	5	4	43.5			Cowpea AMF- R+	5	4	57.3
Lablab AMF+ R-	1	4	48.5	61.6	54.4	43.9	57									Lablab AMF+ R-	1	4	54.4			Lablab AMF+ R-	1	4	43.9			Lablab AMF+ R-	1	4	57
Lablab AMF+ R-	1	4	48.6	61.2	54.7	43.8	57.3									Lablab AMF+ R-	1	4	54.7			Lablab AMF+ R-	1	4	43.8			Lablab AMF+ R-	1	4	57.3
Lablab AMF+ R-	1	4	48	61.3	54.3	44	58.3									Lablab AMF+ R-	1	4	54.3			Lablab AMF+ R-	1	4	44			Lablab AMF+ R-	1	4	58.3
Lablab AMF+ R-	2	4	54	46.7	51.4	43.6	58									Lablab AMF+ R-	2	4	51.4			Lablab AMF+ R-	2	4	43.6			Lablab AMF+ R-	2	4	58
Lablab AMF+ R-	2	4	54.2	46.2	51	43.2	58.1									Lablab AMF+ R-	2	4	51			Lablab AMF+ R-	2	4	43.2			Lablab AMF+ R-	2	4	58.1
Lablab AMF+ R-	2	4	54.1	46.3	51.2	43.9	56.8									Lablab AMF+ R-	2	4	51.2			Lablab AMF+ R-	2	4	43.9			Lablab AMF+ R-	2	4	56.8
Lablab AMF+ R-	3	4	52.6	49.1	49.3	45.6	57.6									Lablab AMF+ R-	3	4	49.3			Lablab AMF+ R-	3	4	45.6			Lablab AMF+ R-	3	4	57.6
Lablab AMF+ R-	3	4	52.4	48.2	49.5	45.2	57.2									Lablab AMF+ R-	3	4	49.5			Lablab AMF+ R-	3	4	45.2			Lablab AMF+ R-	3	4	57.2
Lablab AMF+ R-	3	4	52.3	49	49.1	45.1	37.8									Lablab AMF+ R-	3	4	49.1			Lablab AMF+ R-	3	4	45.1			Lablab AMF+ R-	3	4	37.8
Lablab AMF+ R-	4	4	54.6	48.8	46.8	42.3	37.2									Lablab AMF+ R-	4	4	46.8			Lablab AMF+ R-	4	4	42.3			Lablab AMF+ R-	4	4	37.2
Lablab AMF+ R-	4	4	54.3	48.2	46.2	42.3	37.6									Lablab AMF+ R-	4	4	46.2			Lablab AMF+ R-	4	4	42.3			Lablab AMF+ R-	4	4	37.6
Lablab AMF+ R-	4	4	54	48.3	46.5	42.8	49.3									Lablab AMF+ R-	4	4	46.5			Lablab AMF+ R-	4	4	42.8			Lablab AMF+ R-	4	4	49.3
Lablab AMF+ R-	5	4	53	49.2	47.4	42.1	48.2									Lablab AMF+ R-	5	4	47.4			Lablab AMF+ R-	5	4	42.1			Lablab AMF+ R-	5	4	48.2
Lablab AMF+ R-	5	4	53	47.8	47.2	42.6	48.6									Lablab AMF+ R-	5	4	47.2			Lablab AMF+ R-	5	4	42.6			Lablab AMF+ R-	5	4	48.6
Lablab AMF+ R-	5	4	53.2	48	47.3	42.2	51.2									Lablab AMF+ R-	5	4	47.3			Lablab AMF+ R-	5	4	42.2			Lablab AMF+ R-	5	4	51.2
Mucuna AMF- R+	1	4	53	45	52.4	34.2	50.5									Mucuna AMF- R+	1	4	52.4			Mucuna AMF- R+	1	4	34.2			Mucuna AMF- R+	1	4	50.5
Mucuna AMF- R+	1	4	52.8	45.3	52.4	34.2	51.4									Mucuna AMF- R+	1	4	52.4			Mucuna AMF- R+	1	4	34.2			Mucuna AMF- R+	1	4	51.4
Mucuna AMF- R+	1	4	53.1	45.7	52.7	34	54.3									Mucuna AMF- R+	1	4	52.7			Mucuna AMF- R+	1	4	34			Mucuna AMF- R+	1	4	54.3
Mucuna AMF- R+	2	4	51.4	44.8	52.9	35.2	53.4									Mucuna AMF- R+	2	4	52.9			Mucuna AMF- R+	2	4	35.2			Mucuna AMF- R+	2	4	53.4
Mucuna AMF- R+	2	4	51.7	44	52	35.6	53.6									Mucuna AMF- R+	2	4	52			Mucuna AMF- R+	2	4	35.6			Mucuna AMF- R+	2	4	53.6
Mucuna AMF- R+	2	4	51.8	44.2	52.4	35.1	62.3									Mucuna AMF- R+	2	4	52.4			Mucuna AMF- R+	2	4	35.1			Mucuna AMF- R+	2	4	62.3
Mucuna AMF- R+	3	4	56.3	42.4	53.2	32.6	62									Mucuna AMF- R+	3	4	53.2			Mucuna AMF- R+	3	4	32.6			Mucuna AMF- R+	3	4	62
Mucuna AMF- R+	3	4	56	42.5	53.1	32	63.1									Mucuna AMF- R+	3	4	53.1			Mucuna AMF- R+	3	4	32			Mucuna AMF- R+	3	4	63.1
Mucuna AMF- R+	3	4	56.9	42.7	53.4	32.6	66.5									Mucuna AMF- R+	3	4	53.4			Mucuna AMF- R+	3	4	32.6			Mucuna AMF- R+	3	4	66.5
Mucuna AMF- R+	4	4	51.4	48.1	54.8	30.3	67.2									Mucuna AMF- R+	4	4	54.8			Mucuna AMF- R+	4	4	30.3			Mucuna AMF- R+	4	4	67.2
Mucuna AMF- R+	4	4	51	47.9	54.2	30.8	67.5									Mucuna AMF- R+	4	4	54.2			Mucuna AMF- R+	4	4	30.8			Mucuna AMF- R+	4	4	67.5
Mucuna AMF- R+	4	4	51.7	47.8	54.1	30.8	85.7									Mucuna AMF- R+	4	4	54.1			Mucuna AMF- R+	4	4	30.8			Mucuna AMF- R+	4	4	85.7
Mucuna AMF- R+	5	4	53.6	45.7	52.5	37.5	85.5									Mucuna AMF- R+	5	4	52.5			Mucuna AMF- R+	5	4	37.5			Mucuna AMF- R+	5	4	85.5
Mucuna AMF- R+	5	4	53	45	52.9	37	84.3									Mucuna AMF- R+	5	4	52.9			Mucuna AMF- R+	5	4	37			Mucuna AMF- R+	5	4	84.3
Mucuna AMF- R+	5	4	53.7	45.6	52.9	37.2	57.3									Mucuna AMF- R+	5	4	52.9			Mucuna AMF- R+	5	4	37.2			Mucuna AMF- R+	5	4	57.3
Cowpea AMF- R-	1	4	71.8	51.9	78.7	57.2	57.7									Cowpea AMF- R-	1	4	78.7			Cowpea AMF- R-	1	4	57.2			Cowpea AMF- R-	1	4	57.7
Cowpea AMF- R-	1	4	71.5	51.2	78.4	57.3	58.3									Cowpea AMF- R-	1	4	78.4			Cowpea AMF- R-	1	4	57.3			Cowpea AMF- R-	1	4	58.3
Cowpea AMF- R-	1	4	71.6	51.7	78.3	57	57.5									Cowpea AMF- R-	1	4	78.3			Cowpea AMF- R-	1	4	57			Cowpea AMF- R-	1	4	57.5
Cowpea AMF- R-	2	4	62.8	62.5	64.7	58	58.5									Cowpea AMF- R-	2	4	64.7			Cowpea AMF- R-	2	4	58			Cowpea AMF- R-	2	4	58.5
Cowpea AMF- R-	2	4	62	62	65	58	58.2									Cowpea AMF- R-	2	4	65			Cowpea AMF- R-	2	4	58			Cowpea AMF- R-	2	4	58.2
Cowpea AMF- R-	2	4	62.7	62.3	65	58.8	41.9									Cowpea AMF- R-	2	4	65			Cowpea AMF- R-	2	4	58.8			Cowpea AMF- R-	2	4	41.9
Cowpea AMF- R-	3	4	64.3	56.5	50.8	51	40.8									Cowpea AMF- R-	3	4	50.8			Cowpea AMF- R-	3	4	51			Cowpea AMF- R-	3	4	40.8
Cowpea AMF- R-	3	4	64.7	56	50.7	50	42.6									Cowpea AMF- R-	3	4	50.7			Cowpea AMF- R-	3	4	50			Cowpea AMF- R-	3	4	42.6
Cowpea AMF- R-	3	4	64.1	56.1	50.4	51	42.8									Cowpea AMF- R-	3	4	50.4			Cowpea AMF- R-	3	4	51			Cowpea AMF- R-	3	4	42.8
Cowpea AMF- R-	4	4	64.9	66.8	60.2	55	42.7									Cowpea AMF- R-	4	4	60.2			Cowpea AMF- R-	4	4	55			Cowpea AMF- R-	4	4	42.7
Cowpea AMF- R-	4	4	64.3	66.2	60	55.3	42.4									Cowpea AMF- R-	4	4	60			Cowpea AMF- R-	4	4	55.3			Cowpea AMF- R-	4	4	42.4
Cowpea AMF- R-	4	4	64.7	66.4	60.4	55.2	48.2									Cowpea AMF- R-	4	4	60.4			Cowpea AMF- R-	4	4	55.2			Cowpea AMF- R-	4	4	48.2
Cowpea AMF- R-	5	4	64.1	66	56.8	58.2	47.2									Cowpea AMF- R-	5	4	56.8			Cowpea AMF- R-	5	4	58.2			Cowpea AMF- R-	5	4	47.2
Cowpea AMF- R-	5	4	64.3	66.3	56.4	58.3	41.8									Cowpea AMF- R-	5	4	56.4			Cowpea AMF- R-	5	4	58.3			Cowpea AMF- R-	5	4	41.8
Cowpea AMF- R-	5	4	64.9	66.8	56.7	58	45.9									Cowpea AMF- R-	5	4	56.7			Cowpea AMF- R-	5	4	58			Cowpea AMF- R-	5	4	45.9
Lablab AMF+ R+	1	4	53.7	44.2	57.1	43.2	45.8									Lablab AMF+ R+	1	4	57.1			Lablab AMF+ R+	1	4	43.2			Lablab AMF+ R+	1	4	45.8
Lablab AMF+ R+	1	4	53	44	57.9	43	43.2									Lablab AMF+ R+	1	4	57.9			Lablab AMF+ R+	1	4	43			Lablab AMF+ R+	1	4	43.2
Lablab AMF+ R+	1	4	53.1	44	57.2	43	44.3									Lablab AMF+ R+	1	4	57.2			Lablab AMF+ R+	1	4	43			Lablab AMF+ R+	1	4	44.3
Lablab AMF+ R+	2	4	50.8	48.1	53.4	44.2	44.4									Lablab AMF+ R+	2	4	53.4			Lablab AMF+ R+	2	4	44.2			Lablab AMF+ R+	2	4	44.4
Lablab AMF+ R+	2	4	50	48	53.1	44.6	45.2									Lablab AMF+ R+	2	4	53.1			Lablab AMF+ R+	2	4	44.6			Lablab AMF+ R+	2	4	45.2
Lablab AMF+ R+	2	4	50.4	48.3	53.1	44.8	55.7									Lablab AMF+ R+	2	4	53.1			Lablab AMF+ R+	2	4	44.8			Lablab AMF+ R+	2	4	55.7
Lablab AMF+ R+	3	4	51.1	48.9	53.9	44.8	54.7									Lablab AMF+ R+	3	4	53.9			Lablab AMF+ R+	3	4	44.8			Lablab AMF+ R+	3	4	54.7
Lablab AMF+ R+	3	4	51.4	48	53.7	44.5	55.2									Lablab AMF+ R+	3	4	53.7			Lablab AMF+ R+	3	4	44.5			Lablab AMF+ R+	3	4	55.2
Lablab AMF+ R+	3	4	51	48.2	53.4	44.2	43.8									Lablab AMF+ R+	3	4	53.4			Lablab AMF+ R+	3	4	44.2			Lablab AMF+ R+	3	4	43.8
Lablab AMF+ R+	4	4	52.5	52.8	51.9	55.4	44.9									Lablab AMF+ R+	4	4	51.9			Lablab AMF+ R+	4	4	55.4			Lablab AMF+ R+	4	4	44.9
Lablab AMF+ R+	4	4	52.6	52.8	51.8	55.5	44.6									Lablab AMF+ R+	4	4	51.8			Lablab AMF+ R+	4	4	55.5			Lablab AMF+ R+	4	4	44.6
Lablab AMF+ R+	4	4	52.6	52.3	51.7	55.8	49.6									Lablab AMF+ R+	4	4	51.7			Lablab AMF+ R+	4	4	55.8			Lablab AMF+ R+	4	4	49.6
Lablab AMF+ R+	5	4	49.3	54.1	52.3	45.5	48.9									Lablab AMF+ R+	5	4	52.3			Lablab AMF+ R+	5	4	45.5			Lablab AMF+ R+	5	4	48.9
Lablab AMF+ R+	5	4	49.8	54	52.4	45.6	50									Lablab AMF+ R+	5	4	52.4			Lablab AMF+ R+	5	4	45.6			Lablab AMF+ R+	5	4	50
Lablab AMF+ R+	5	4	49.3	54.7	52	45	54.7									Lablab AMF+ R+	5	4	52			Lablab AMF+ R+	5	4	45			Lablab AMF+ R+	5	4	54.7
Mucuna AMF- R-	1	4	58.2	44	54.1	55	54									Mucuna AMF- R-	1	4	54.1			Mucuna AMF- R-	1	4	55			Mucuna AMF- R-	1	4	54
Mucuna AMF- R-	1	4	58.3	44.6	54	55	54.9									Mucuna AMF- R-	1	4	54			Mucuna AMF- R-	1	4	55			Mucuna AMF- R-	1	4	54.9
Mucuna AMF- R-	1	4	58.9	44.1	54.3	54.6	51.5									Mucuna AMF- R-	1	4	54.3			Mucuna AMF- R-	1	4	54.6			Mucuna AMF- R-	1	4	51.5
Mucuna AMF- R-	2	4	55.1	45.3	43.5	30.8	53.3									Mucuna AMF- R-	2	4	43.5			Mucuna AMF- R-	2	4	30.8			Mucuna AMF- R-	2	4	53.3
Mucuna AMF- R-	2	4	55.2	45.8	43.1	30.2	52									Mucuna AMF- R-	2	4	43.1			Mucuna AMF- R-	2	4	30.2			Mucuna AMF- R-	2	4	52
Mucuna AMF- R-	2	4	55.8	45.1	43.7	30.5	66.3									Mucuna AMF- R-	2	4	43.7			Mucuna AMF- R-	2	4	30.5			Mucuna AMF- R-	2	4	66.3
Mucuna AMF- R-	3	4	54.2	40.7	55.9	24.9	66.5									Mucuna AMF- R-	3	4	55.9			Mucuna AMF- R-	3	4	24.9			Mucuna AMF- R-	3	4	66.5
Mucuna AMF- R-	3	4	54.4	40.1	55.4	24.7	65.8									Mucuna AMF- R-	3	4	55.4			Mucuna AMF- R-	3	4	24.7			Mucuna AMF- R-	3	4	65.8
Mucuna AMF- R-	3	4	54.6	40.2	55.3	24.6	68.7									Mucuna AMF- R-	3	4	55.3			Mucuna AMF- R-	3	4	24.6			Mucuna AMF- R-	3	4	68.7
Mucuna AMF- R-	4	4	51.3	49.8	51.7	309	69.7									Mucuna AMF- R-	4	4	51.7			Mucuna AMF- R-	4	4	309			Mucuna AMF- R-	4	4	69.7
Mucuna AMF- R-	4	4	51.4	49.3	51.3	30.5	69.3									Mucuna AMF- R-	4	4	51.3			Mucuna AMF- R-	4	4	30.5			Mucuna AMF- R-	4	4	69.3
Mucuna AMF- R-	4	4	52.7	49.5	51.5	30.2	64.4									Mucuna AMF- R-	4	4	51.5			Mucuna AMF- R-	4	4	30.2			Mucuna AMF- R-	4	4	64.4
Mucuna AMF- R-	5	4	51.8	43.6	55.9	35.3	65.2									Mucuna AMF- R-	5	4	55.9			Mucuna AMF- R-	5	4	35.3			Mucuna AMF- R-	5	4	65.2
Mucuna AMF- R-	5	4	51	43.1	55.3	35.4	64.8									Mucuna AMF- R-	5	4	55.3			Mucuna AMF- R-	5	4	35.4			Mucuna AMF- R-	5	4	64.8
Mucuna AMF- R-	5	4	51.7	43.8	56.5	35.2	59.6									Mucuna AMF- R-	5	4	56.5			Mucuna AMF- R-	5	4	35.2			Mucuna AMF- R-	5	4	59.6
Cowpea AMF+ R+	1	4	60.8	59.4	70.4	67	59.9									Cowpea AMF+ R+	1	4	70.4			Cowpea AMF+ R+	1	4	67			Cowpea AMF+ R+	1	4	59.9
Cowpea AMF+ R+	1	4	61	59.8	70.3	67.2	59.6									Cowpea AMF+ R+	1	4	70.3			Cowpea AMF+ R+	1	4	67.2			Cowpea AMF+ R+	1	4	59.6
Cowpea AMF+ R+	1	4	61.2	59.2	70.5	67.4	62.3									Cowpea AMF+ R+	1	4	70.5			Cowpea AMF+ R+	1	4	67.4			Cowpea AMF+ R+	1	4	62.3
Cowpea AMF+ R+	2	4	63	58	65.8	65	54.1									Cowpea AMF+ R+	2	4	65.8			Cowpea AMF+ R+	2	4	65			Cowpea AMF+ R+	2	4	54.1
Cowpea AMF+ R+	2	4	62.8	58	65.4	65.4	63									Cowpea AMF+ R+	2	4	65.4			Cowpea AMF+ R+	2	4	65.4			Cowpea AMF+ R+	2	4	63
Cowpea AMF+ R+	2	4	63	58.2	65.3	65.3	38.3									Cowpea AMF+ R+	2	4	65.3			Cowpea AMF+ R+	2	4	65.3			Cowpea AMF+ R+	2	4	38.3
Cowpea AMF+ R+	3	4	71.2	62.3	62	68.6	37.9									Cowpea AMF+ R+	3	4	62			Cowpea AMF+ R+	3	4	68.6			Cowpea AMF+ R+	3	4	37.9
Cowpea AMF+ R+	3	4	72.4	62.4	63.8	68	39.5									Cowpea AMF+ R+	3	4	63.8			Cowpea AMF+ R+	3	4	68			Cowpea AMF+ R+	3	4	39.5
Cowpea AMF+ R+	3	4	71.9	62.7	62.1	68	40.2									Cowpea AMF+ R+	3	4	62.1			Cowpea AMF+ R+	3	4	68			Cowpea AMF+ R+	3	4	40.2
Cowpea AMF+ R+	4	4	71.4	62.1	71.3	56.2	40									Cowpea AMF+ R+	4	4	71.3			Cowpea AMF+ R+	4	4	56.2			Cowpea AMF+ R+	4	4	40
Cowpea AMF+ R+	4	4	71.5	62.8	71.4	56.5	42.8									Cowpea AMF+ R+	4	4	71.4			Cowpea AMF+ R+	4	4	56.5			Cowpea AMF+ R+	4	4	42.8
Cowpea AMF+ R+	4	4	70.8	62.2	71.3	56	47.4									Cowpea AMF+ R+	4	4	71.3			Cowpea AMF+ R+	4	4	56			Cowpea AMF+ R+	4	4	47.4
Cowpea AMF+ R+	5	4	66.8	64.5	72.4	67.3	48.1									Cowpea AMF+ R+	5	4	72.4			Cowpea AMF+ R+	5	4	67.3			Cowpea AMF+ R+	5	4	48.1
Cowpea AMF+ R+	5	4	66.6	65	72.3	67.5	49.4									Cowpea AMF+ R+	5	4	72.3			Cowpea AMF+ R+	5	4	67.5			Cowpea AMF+ R+	5	4	49.4
Cowpea AMF+ R+	5	4	67	64.8	72	67	44.3									Cowpea AMF+ R+	5	4	72			Cowpea AMF+ R+	5	4	67			Cowpea AMF+ R+	5	4	44.3
Lablab AMF- R-	1	4	53.9	54	52.5	37.9	45									Lablab AMF- R-	1	4	52.5			Lablab AMF- R-	1	4	37.9			Lablab AMF- R-	1	4	45
Lablab AMF- R-	1	4	52.3	54.2	51.1	36.9	44.9									Lablab AMF- R-	1	4	51.1			Lablab AMF- R-	1	4	36.9			Lablab AMF- R-	1	4	44.9
Lablab AMF- R-	1	4	52.7	54.2	52.4	36.8	40.9									Lablab AMF- R-	1	4	52.4			Lablab AMF- R-	1	4	36.8			Lablab AMF- R-	1	4	40.9
Lablab AMF- R-	2	4	53.3	50.3	52.2	45.1	40.1									Lablab AMF- R-	2	4	52.2			Lablab AMF- R-	2	4	45.1			Lablab AMF- R-	2	4	40.1
Lablab AMF- R-	2	4	53	50.2	52	45	39.3									Lablab AMF- R-	2	4	52			Lablab AMF- R-	2	4	45			Lablab AMF- R-	2	4	39.3
Lablab AMF- R-	2	4	53	50.7	51.7	46.2	42.2									Lablab AMF- R-	2	4	51.7			Lablab AMF- R-	2	4	46.2			Lablab AMF- R-	2	4
Lablab AMF- R-	3	4	53.4	52.7	52.8	43.2	40.3									Lablab AMF- R-	3	4	52.8			Lablab AMF- R-	3	4	43.2			Lablab AMF- R-	3	4
Lablab AMF- R-	3	4	53	52	52	43.5	45.3									Lablab AMF- R-	3	4	52			Lablab AMF- R-	3	4	43.5			Lablab AMF- R-	3	4
Lablab AMF- R-	3	4	53.7	52.1	51.7	42.9	42									Lablab AMF- R-	3	4	51.7			Lablab AMF- R-	3	4	42.9			Lablab AMF- R-	3	4
Lablab AMF- R-	4	4	51.3	50.5	49.5	42.3	42.3									Lablab AMF- R-	4	4	49.5			Lablab AMF- R-	4	4	42.3			Lablab AMF- R-	4	4
Lablab AMF- R-	4	4	51.5	50.3	49.3	42.6	42.6									Lablab AMF- R-	4	4	49.3			Lablab AMF- R-	4	4	42.6			Lablab AMF- R-	4	4
Lablab AMF- R-	4	4	51.8	50.7	49.5	42.4	42.5									Lablab AMF- R-	4	4	49.5			Lablab AMF- R-	4	4	42.4			Lablab AMF- R-	4	4
Lablab AMF- R-	5	4	58.4	50.8	49.2	40.2	43.6									Lablab AMF- R-	5	4	49.2			Lablab AMF- R-	5	4	40.2			Lablab AMF- R-	5	4
Lablab AMF- R-	5	4	58.4	50.1	49	40.8	43									Lablab AMF- R-	5	4	49			Lablab AMF- R-	5	4	40.8			Lablab AMF- R-	5	4
Lablab AMF- R-	5	4	58.3	50.4	49.1	40.2	43.1									Lablab AMF- R-	5	4	49.1			Lablab AMF- R-	5	4	40.2			Lablab AMF- R-	5	4

## Sheet: Stem diameter
			Stem diameter (cm)
Traetment	Replicate	Block	Stem diameter 30 DAE	Stem diameter 60 DAE	Stem diameter 90 DAE		DAE stands for Days After Emergenece
Mucuna AMF- R-	1	1	0.73	0.8	0.91		AMF = arbuscular mycorrhizal fungi
Mucuna AMF- R-	2	1	0.7	0.86	0.96		R- means no rhizobium inoculation
Mucuna AMF- R-	3	1	0.73	0.83	0.98		R+ means rhizobium inoculation
Mucuna AMF- R-	4	1	0.72	0.82	0.98
Mucuna AMF- R-	5	1	0.7	0.86	0.97
Cowpea AMF+ R-	1	1	1.13	1.23	1.35
Cowpea AMF+ R-	2	1	1.11	1.26	1.36
Cowpea AMF+ R-	3	1	1.09	1.26	1.36
Cowpea AMF+ R-	4	1	1.15	1.25	1.39
Cowpea AMF+ R-	5	1	1.05	1.25	1.38
Lablab AMF- R+	1	1	0.8	0.9	1.1
Lablab AMF- R+	2	1	0.81	0.96	1.1
Lablab AMF- R+	3	1	0.82	0.93	1.05
Lablab AMF- R+	4	1	0.8	0.96	1.05
Lablab AMF- R+	5	1	0.79	0.93	1.1
Mucuna AMF+ R-	1	1	0.73	0.85	0.96
Mucuna AMF+ R-	2	1	0.7	0.8	0.9
Mucuna AMF+ R-	3	1	0.7	0.8	0.96
Mucuna AMF+ R-	4	1	0.76	0.83	0.98
Mucuna AMF+ R-	5	1	0.72	0.85	0.99
Cowpea AMF- R+	1	1	0.73	0.83	0.96
Cowpea AMF- R+	2	1	0.8	0.85	0.95
Cowpea AMF- R+	3	1	0.7	0.82	0.93
Cowpea AMF- R+	4	1	0.75	0.82	0.99
Cowpea AMF- R+	5	1	0.8	0.83	0.9
Lablab AMF+ R-	1	1	1.04	1.12	1.2
Lablab AMF+ R-	2	1	1.03	1.13	1.25
Lablab AMF+ R-	3	1	1.04	1.13	1.26
Lablab AMF+ R-	4	1	1.02	1.12	1.26
Lablab AMF+ R-	5	1	1.04	1.12	1.2
Mucuna AMF- R+	1	1	0.76	0.86	0.96
Mucuna AMF- R+	2	1	0.75	0.86	0.96
Mucuna AMF- R+	3	1	0.7	0.85	0.96
Mucuna AMF- R+	4	1	0.7	0.85	0.95
Mucuna AMF- R+	5	1	0.72	0.89	0.98
Cowpea AMF+ R+	1	1	1.15	1.25	1.36
Cowpea AMF+ R+	2	1	1.18	1.25	1.45
Cowpea AMF+ R+	3	1	1.12	1.26	1.4
Cowpea AMF+ R+	4	1	1.13	1.23	1.4
Cowpea AMF+ R+	5	1	1.18	1.25	1.6
Lablab AMF- R-	1	1	0.68	0.78	0.9
Lablab AMF- R-	2	1	0.66	0.78	0.9
Lablab AMF- R-	3	1	0.63	0.76	0.9
Lablab AMF- R-	4	1	0.59	0.75	0.8
Lablab AMF- R-	5	1	0.64	0.75	0.86
Mucuna AMF+ R+	1	1	0.86	0.95	1.1
Mucuna AMF+ R+	2	1	0.85	0.92	1
Mucuna AMF+ R+	3	1	0.83	0.9	1.12
Mucuna AMF+ R+	4	1	0.82	0.9	1.1
Mucuna AMF+ R+	5	1	0.85	0.95	1.13
Cowpea AMF- R-	1	1	0.68	0.73	0.98
Cowpea AMF- R-	2	1	0.67	0.75	0.98
Cowpea AMF- R-	3	1	0.65	0.75	0.96
Cowpea AMF- R-	4	1	0.66	0.7	0.9
Cowpea AMF- R-	5	1	0.68	0.76	0.95
Lablab AMF+ R+	1	1	1.16	1.23	1.46
Lablab AMF+ R+	2	1	1.15	1.25	1.45
Lablab AMF+ R+	3	1	1.18	1.2	1.46
Lablab AMF+ R+	4	1	1.14	1.2	1.36
Lablab AMF+ R+	5	1	1.13	1.26	1.36
Lablab AMF+ R+	1	2	1.03	1.2	1.3
Lablab AMF+ R+	2	2	1.03	1.23	1.35
Lablab AMF+ R+	3	2	1.01	1.23	1.35
Lablab AMF+ R+	4	2	1.02	1.25	1.3
Lablab AMF+ R+	5	2	1.02	1.25	1.36
Mucuna AMF- R-	1	2	0.6	0.8	0.95
Mucuna AMF- R-	2	2	0.7	0.85	0.96
Mucuna AMF- R-	3	2	0.7	0.85	0.95
Mucuna AMF- R-	4	2	0.68	0.9	0.9
Mucuna AMF- R-	5	2	0.63	0.9	0.9
Cowpea AMF+ R+	1	2	1.06	1.13	1.2
Cowpea AMF+ R+	2	2	1.05	1.12	1.23
Cowpea AMF+ R+	3	2	1.06	1.15	1.4
Cowpea AMF+ R+	4	2	1.05	1.13	1.36
Cowpea AMF+ R+	5	2	1.05	1.15	1.36
Lablab AMF- R-	1	2	0.58	0.69	0.76
Lablab AMF- R-	2	2	0.59	0.68	0.7
Lablab AMF- R-	3	2	0.56	0.63	0.75
Lablab AMF- R-	4	2	0.52	0.61	0.75
Lablab AMF- R-	5	2	0.55	0.69	0.7
Mucuna AMF+ R+	1	2	0.76	0.86	0.96
Mucuna AMF+ R+	2	2	0.77	0.86	0.9
Mucuna AMF+ R+	3	2	0.75	0.85	0.9
Mucuna AMF+ R+	4	2	0.76	0.89	0.98
Mucuna AMF+ R+	5	2	0.77	0.82	0.96
Cowpea AMF- R-	1	2	0.58	0.62	0.8
Cowpea AMF- R-	2	2	0.58	0.6	0.7
Cowpea AMF- R-	3	2	0.59	0.6	0.8
Cowpea AMF- R-	4	2	0.53	0.68	0.7
Cowpea AMF- R-	5	2	0.58	0.63	0.8
Lablab AMF+ R-	1	2	0.95	1.02	1.1
Lablab AMF+ R-	2	2	0.95	1.02	1.2
Lablab AMF+ R-	3	2	0.92	1.04	1
Lablab AMF+ R-	4	2	0.94	1.05	1.1
Lablab AMF+ R-	5	2	0.96	1.02	1.2
Mucuna AMF- R+	1	2	0.68	0.72	0.9
Mucuna AMF- R+	2	2	0.65	0.72	0.8
Mucuna AMF- R+	3	2	0.62	0.7	0.8
Mucuna AMF- R+	4	2	0.63	0.75	0.8
Mucuna AMF- R+	5	2	0.68	0.76	0.9
Cowpea AMF+ R-	1	2	1.05	1.12	1.3
Cowpea AMF+ R-	2	2	1.02	1.15	1.3
Cowpea AMF+ R-	3	2	1.06	1.19	1.32
Cowpea AMF+ R-	4	2	1.06	1.18	1.32
Cowpea AMF+ R-	5	2	1.08	1.16	1.3
Lablab AMF- R+	1	2	0.75	0.85	0.9
Lablab AMF- R+	2	2	0.72	0.86	0.9
Lablab AMF- R+	3	2	0.75	0.86	0.9
Lablab AMF- R+	4	2	0.75	0.8	0.96
Lablab AMF- R+	5	2	0.74	0.86	0.95
Mucuna AMF+ R-	1	2	0.68	0.86	0.98
Mucuna AMF+ R-	2	2	0.66	0.78	0.98
Mucuna AMF+ R-	3	2	0.69	0.8	0.96
Mucuna AMF+ R-	4	2	0.62	0.78	0.96
Mucuna AMF+ R-	5	2	0.61	0.7	0.9
Cowpea AMF- R+	1	2	0.69	0.8	1.02
Cowpea AMF- R+	2	2	0.68	0.76	1.02
Cowpea AMF- R+	3	2	0.65	0.78	1.03
Cowpea AMF- R+	4	2	0.62	0.78	1.02
Cowpea AMF- R+	5	2	0.63	0.7	1.03
Cowpea AMF- R-	1	3	0.68	0.76	0.86
Cowpea AMF- R-	2	3	0.7	0.78	0.8
Cowpea AMF- R-	3	3	0.68	0.7	0.8
Cowpea AMF- R-	4	3	0.69	0.79	0.83
Cowpea AMF- R-	5	3	0.63	0.79	0.85
Lablab AMF+ R+	1	3	1.24	1.36	1.5
Lablab AMF+ R+	2	3	1.23	1.3	1.6
Lablab AMF+ R+	3	3	1.26	1.32	1.5
Lablab AMF+ R+	4	3	1.2	1.36	1.5
Lablab AMF+ R+	5	3	1.29	1.36	1.5
Mucuna AMF- R-	1	3	0.86	1.96	2.01
Mucuna AMF- R-	2	3	0.85	1.96	2.01
Mucuna AMF- R-	3	3	0.81	1.95	2.03
Mucuna AMF- R-	4	3	0.86	1.95	2
Mucuna AMF- R-	5	3	0.84	1.92	2.03
Cowpea AMF+ R-	1	3	1.2	1.35	1.5
Cowpea AMF+ R-	2	3	1.18	1.29	1.5
Cowpea AMF+ R-	3	3	1.23	1.38	1.6
Cowpea AMF+ R-	4	3	1.22	1.3	1.5
Cowpea AMF+ R-	5	3	1.24	1.35	1.6
Lablab AMF- R+	1	3	0.92	1.02	1.1
Lablab AMF- R+	2	3	0.91	1.02	1.2
Lablab AMF- R+	3	3	0.96	1.05	1.1
Lablab AMF- R+	4	3	0.91	1.05	1.2
Lablab AMF- R+	5	3	0.92	1.05	1.2
Mucuna AMF+ R-	1	3	0.86	0.9	1.1
Mucuna AMF+ R-	2	3	0.89	0.9	1
Mucuna AMF+ R-	3	3	0.81	0.9	1.12
Mucuna AMF+ R-	4	3	0.82	0.96	1.13
Mucuna AMF+ R-	5	3	0.82	0.93	1.12
Cowpea AMF- R+	1	3	0.86	0.9	1.23
Cowpea AMF- R+	2	3	0.85	0.92	1.23
Cowpea AMF- R+	3	3	0.89	0.96	1.23
Cowpea AMF- R+	4	3	0.84	0.98	1.23
Cowpea AMF- R+	5	3	0.85	0.98	1.1
Lablab AMF+ R-	1	3	1.16	1.26	1.4
Lablab AMF+ R-	2	3	1.13	1.25	1.4
Lablab AMF+ R-	3	3	1.19	1.25	1.48
Lablab AMF+ R-	4	3	1.14	1.25	1.39
Lablab AMF+ R-	5	3	1.14	1.26	1.3
Mucuna AMF- R+	1	3	0.8	0.9	1.1
Mucuna AMF- R+	2	3	0.84	0.96	1.1
Mucuna AMF- R+	3	3	0.83	0.96	1
Mucuna AMF- R+	4	3	0.8	0.95	1.1
Mucuna AMF- R+	5	3	0.86	0.98	1.2
Cowpea AMF+ R+	1	3	1.23	1.36	1.8
Cowpea AMF+ R+	2	3	1.25	1.3	1.8
Cowpea AMF+ R+	3	3	1.29	1.36	1.7
Cowpea AMF+ R+	4	3	1.23	1.36	1.7
Cowpea AMF+ R+	5	3	1.28	1.38	1.5
Lablab AMF- R-	1	3	0.78	0.9	1.12
Lablab AMF- R-	2	3	0.8	0.9	1.12
Lablab AMF- R-	3	3	0.76	0.8	1.2
Lablab AMF- R-	4	3	0.78	0.86	1.1
Lablab AMF- R-	5	3	0.72	0.81	1.1
Mucuna AMF+ R+	1	3	0.93	1.02	1.2
Mucuna AMF+ R+	2	3	0.96	1.05	1.2
Mucuna AMF+ R+	3	3	0.96	1.05	1
Mucuna AMF+ R+	4	3	0.95	1.05	1.1
Mucuna AMF+ R+	5	3	0.92	1.06	1.1
Mucuna AMF+ R+	1	4	1.05	1.1	1.3
Mucuna AMF+ R+	2	4	1.06	1.15	1.3
Mucuna AMF+ R+	3	4	1.08	1.15	1.36
Mucuna AMF+ R+	4	4	1.09	1.1	1.36
Mucuna AMF+ R+	5	4	1.08	1.18	1.36
Cowpea AMF+ R-	1	4	1.4	1.56	1.7
Cowpea AMF+ R-	2	4	1.3	1.56	1.8
Cowpea AMF+ R-	3	4	1.32	1.6	1.75
Cowpea AMF+ R-	4	4	1.36	1.6	1.8
Cowpea AMF+ R-	5	4	1.35	1.5	1.7
Lablab AMF- R+	1	4	1.06	1.16	1.36
Lablab AMF- R+	2	4	1.09	1.14	1.36
Lablab AMF- R+	3	4	1.08	1.15	1.3
Lablab AMF- R+	4	4	1.08	1.17	1.2
Lablab AMF- R+	5	4	1.05	1.13	1.3
Mucuna AMF+ R-	1	4	0.96	1	1.2
Mucuna AMF+ R-	2	4	0.95	1.02	1.23
Mucuna AMF+ R-	3	4	0.95	1.05	1.25
Mucuna AMF+ R-	4	4	0.97	1.05	1.2
Mucuna AMF+ R-	5	4	0.96	1.06	1.2
Cowpea AMF- R+	1	4	0.95	1.1	1.36
Cowpea AMF- R+	2	4	0.92	1	1.4
Cowpea AMF- R+	3	4	0.98	1.05	1.36
Cowpea AMF- R+	4	4	0.98	1.04	1.3
Cowpea AMF- R+	5	4	0.96	1.06	1.3
Lablab AMF+ R-	1	4	1.23	1.36	1.56
Lablab AMF+ R-	2	4	1.29	1.36	1.5
Lablab AMF+ R-	3	4	1.28	1.3	1.5
Lablab AMF+ R-	4	4	1.23	1.32	1.49
Lablab AMF+ R-	5	4	1.25	1.35	1.5
Mucuna AMF- R+	1	4	0.9	1.02	1.2
Mucuna AMF- R+	2	4	0.9	1	1.23
Mucuna AMF- R+	3	4	0.9	1.02	1.19
Mucuna AMF- R+	4	4	0.96	1.1	1.18
Mucuna AMF- R+	5	4	0.92	1.05	1.2
Cowpea AMF- R-	1	4	0.78	0.9	1.12
Cowpea AMF- R-	2	4	0.76	0.8	1.1
Cowpea AMF- R-	3	4	0.79	0.8	1.18
Cowpea AMF- R-	4	4	0.78	0.86	1.14
Cowpea AMF- R-	5	4	0.75	0.85	1.2
Lablab AMF+ R+	1	4	1.32	1.45	1.65
Lablab AMF+ R+	2	4	1.36	1.46	1.6
Lablab AMF+ R+	3	4	1.36	1.5	1.65
Lablab AMF+ R+	4	4	1.34	1.45	1.6
Lablab AMF+ R+	5	4	1.39	1.5	1.58
Mucuna AMF- R-	1	4	0.96	1.05	1.2
Mucuna AMF- R-	2	4	0.95	1.05	1.2
Mucuna AMF- R-	3	4	0.95	1.06	1.21
Mucuna AMF- R-	4	4	0.9	1.09	1.2
Mucuna AMF- R-	5	4	0.96	1.05	1.25
Cowpea AMF+ R+	1	4	1.36	1.45	2.1
Cowpea AMF+ R+	2	4	1.35	1.5	2
Cowpea AMF+ R+	3	4	1.35	1.5	2.2
Cowpea AMF+ R+	4	4	1.3	1.5	2.2
Cowpea AMF+ R+	5	4	1.39	1.6	2.1
Lablab AMF- R-	1	4	0.86	0.9	1.2
Lablab AMF- R-	2	4	0.89	0.96	1.1
Lablab AMF- R-	3	4	0.86	1	1.1
Lablab AMF- R-	4	4	0.85	0.96	1.2
Lablab AMF- R-	5	4	0.87	0.9	1.1

## Sheet: Sheet3
			Plant height cm
Traetment	Replicate	Block	Plant height 30 DAE	Plant height 60 DAE	Plant height 90 DAE
Mucuna AMF- R-	1	1	82	90	120
Mucuna AMF- R-	2	1	83	92.3	126.3
Mucuna AMF- R-	3	1	83	92.3	130
Mucuna AMF- R-	4	1	80	93	126.3
Mucuna AMF- R-	5	1	81	91.2	125.3
Cowpea AMF+ R-	1	1	32	38.2	62.3
Cowpea AMF+ R-	2	1	31	37.5	50
Cowpea AMF+ R-	3	1	32	38	62.3
Cowpea AMF+ R-	4	1	30	39.2	60.8
Cowpea AMF+ R-	5	1	29	38.5	62.3
Lablab AMF- R+	1	1	73	83.5	119
Lablab AMF- R+	2	1	72	84.3	119.3
Lablab AMF- R+	3	1	75	84.5	102
Lablab AMF- R+	4	1	76	83.8	104.6
Lablab AMF- R+	5	1	74	84	102.2
Mucuna AMF+ R-	1	1	90	105.9	133.5
Mucuna AMF+ R-	2	1	92	106.3	126
Mucuna AMF+ R-	3	1	93	108	128.2
Mucuna AMF+ R-	4	1	90	105.6	126.8
Mucuna AMF+ R-	5	1	90	105.4	119.8
Cowpea AMF- R+	1	1	28	35.2	68.2
Cowpea AMF- R+	2	1	29	36	65.3
Cowpea AMF- R+	3	1	28	35.8	62.3
Cowpea AMF- R+	4	1	26	34.9	60
Cowpea AMF- R+	5	1	25	36.2	50
Lablab AMF+ R-	1	1	86	99.5	115
Lablab AMF+ R-	2	1	89	98.7	125
Lablab AMF+ R-	3	1	88	98.3	118
Lablab AMF+ R-	4	1	88	99.4	124
Lablab AMF+ R-	5	1	87	99.3	116
Mucuna AMF- R+	1	1	90	105	115
Mucuna AMF- R+	2	1	89	106.3	120
Mucuna AMF- R+	3	1	92	105.9	127
Mucuna AMF- R+	4	1	90	105	113
Mucuna AMF- R+	5	1	89	106.3	115
Cowpea AMF+ R+	1	1	45	57.2	80
Cowpea AMF+ R+	2	1	42	58.2	76
Cowpea AMF+ R+	3	1	47	59.2	68
Cowpea AMF+ R+	4	1	48	56.3	65
Cowpea AMF+ R+	5	1	49	56.1	78
Lablab AMF- R-	1	1	68	79.6	90.2
Lablab AMF- R-	2	1	65	78.5	92.3
Lablab AMF- R-	3	1	66	78.6	99.3
Lablab AMF- R-	4	1	66	79	98.5
Lablab AMF- R-	5	1	63	78.3	95
Mucuna AMF+ R+	1	1	124.4	139	146.3
Mucuna AMF+ R+	2	1	125	138	157
Mucuna AMF+ R+	3	1	120.5	136	165
Mucuna AMF+ R+	4	1	123.6	134	150
Mucuna AMF+ R+	5	1	120.8	136	149.2
Cowpea AMF- R-	1	1	20.3	38.6	62.3
Cowpea AMF- R-	2	1	22.5	39.2	60
Cowpea AMF- R-	3	1	23.4	39	65
Cowpea AMF- R-	4	1	22.5	39.7	55
Cowpea AMF- R-	5	1	21.3	38.6	60.5
Lablab AMF+ R+	1	1	98.6	129	180
Lablab AMF+ R+	2	1	95.6	120	178.2
Lablab AMF+ R+	3	1	96.3	124	182.3
Lablab AMF+ R+	4	1	98.2	124.3	178
Lablab AMF+ R+	5	1	98	120	180.2
Lablab AMF+ R+	1	2	90.2	125.3	130.6
Lablab AMF+ R+	2	2	91	125	136
Lablab AMF+ R+	3	2	90.5	122	140
Lablab AMF+ R+	4	2	91.2	120	150
Lablab AMF+ R+	5	2	90.5	121	147
Mucuna AMF- R-	1	2	76.3	90.2	127
Mucuna AMF- R-	2	2	78.2	90	119.2
Mucuna AMF- R-	3	2	78.5	89.6	120.3
Mucuna AMF- R-	4	2	77.2	89.9	118.5
Mucuna AMF- R-	5	2	76	90.2	118
Cowpea AMF+ R+	1	2	40.2	52.3	70.2
Cowpea AMF+ R+	2	2	40.5	53.2	68.8
Cowpea AMF+ R+	3	2	40.6	50	70.3
Cowpea AMF+ R+	4	2	41	56.3	62.3
Cowpea AMF+ R+	5	2	40.8	55	70.6
Lablab AMF- R-	1	2	60.2	72.5	125
Lablab AMF- R-	2	2	61	73.2	118
Lablab AMF- R-	3	2	61.4	73	122
Lablab AMF- R-	4	2	60.7	74	114
Lablab AMF- R-	5	2	60.3	75	115.6
Mucuna AMF+ R+	1	2	102	119.3	128.3
Mucuna AMF+ R+	2	2	100.2	115.6	130.6
Mucuna AMF+ R+	3	2	103.2	118.2	128.3
Mucuna AMF+ R+	4	2	102.3	114.3	129.6
Mucuna AMF+ R+	5	2	100.8	116	130.5
Cowpea AMF- R-	1	2	20.3	35.6	50.3
Cowpea AMF- R-	2	2	21	36.5	50.3
Cowpea AMF- R-	3	2	20.8	39.5	48.6
Cowpea AMF- R-	4	2	20.6	38.2	50.3
Cowpea AMF- R-	5	2	20.1	34.3	48
Lablab AMF+ R-	1	2	80.3	92.3	109.3
Lablab AMF+ R-	2	2	80.2	95.3	115
Lablab AMF+ R-	3	2	81	93.6	106.3
Lablab AMF+ R-	4	2	80.6	92.3	102
Lablab AMF+ R-	5	2	80.4	94.3	114.8
Mucuna AMF- R+	1	2	78.2	91.5	110.8
Mucuna AMF- R+	2	2	79.3	91.3	112.3
Mucuna AMF- R+	3	2	78.6	92.3	115.3
Mucuna AMF- R+	4	2	78.2	90.2	120.3
Mucuna AMF- R+	5	2	78	89.2	123
Cowpea AMF+ R-	1	2	26.2	38.2	68
Cowpea AMF+ R-	2	2	25.3	39.3	64.2
Cowpea AMF+ R-	3	2	25.8	38.5	62.3
Cowpea AMF+ R-	4	2	25	38	58.6
Cowpea AMF+ R-	5	2	26.3	38	56.2
Lablab AMF- R+	1	2	65.3	80.2	103.2
Lablab AMF- R+	2	2	66.2	82.5	103.5
Lablab AMF- R+	3	2	66.1	80.3	104.3
Lablab AMF- R+	4	2	65.7	83.2	101.8
Lablab AMF- R+	5	2	65.5	80.3	100.3
Mucuna AMF+ R-	1	2	84.5	99	113
Mucuna AMF+ R-	2	2	84.2	98.3	112.5
Mucuna AMF+ R-	3	2	85	98.6	119.2
Mucuna AMF+ R-	4	2	84.6	99.5	110.5
Mucuna AMF+ R-	5	2	84.9	97.8	116
Cowpea AMF- R+	1	2	22.2	33.2	65.3
Cowpea AMF- R+	2	2	23	33.6	67.2
Cowpea AMF- R+	3	2	22.4	35.6	60.3
Cowpea AMF- R+	4	2	22.4	34.2	63.2
Cowpea AMF- R+	5	2	22.6	33.5	61.5
Cowpea AMF- R-	1	3	29.3	37.2	60.2
Cowpea AMF- R-	2	3	29.5	35.2	60.2
Cowpea AMF- R-	3	3	28.6	36.2	60.5
Cowpea AMF- R-	4	3	29.3	33.2	58.5
Cowpea AMF- R-	5	3	26.3	37.2	60
Lablab AMF+ R+	1	3	111.2	123.2	168
Lablab AMF+ R+	2	3	110.5	128.2	158.2
Lablab AMF+ R+	3	3	111.3	129.2	168.2
Lablab AMF+ R+	4	3	110.8	123.2	159.2
Lablab AMF+ R+	5	3	110.6	122.5	160.3
Mucuna AMF- R+	1	3	99.5	106	142.8
Mucuna AMF- R+	2	3	99.3	110	148
Mucuna AMF- R+	3	3	98.7	109.2	146.3
Mucuna AMF- R+	4	3	99.1	110.3	146.2
Mucuna AMF- R+	5	3	98.8	108.5	143
Cowpea AMF+ R-	1	3	38.7	45	60.2
Cowpea AMF+ R-	2	3	39	48.9	61.2
Cowpea AMF+ R-	3	3	38.6	42.6	65.3
Cowpea AMF+ R-	4	3	39.1	49.3	57.2
Cowpea AMF+ R-	5	3	38.9	50.2	60.3
Lablab AMF- R+	1	3	85.3	100.3	128.2
Lablab AMF- R+	2	3	84.7	99	120.3
Lablab AMF- R+	3	3	84.9	102.2	119.6
Lablab AMF- R+	4	3	85	99.5	116.3
Lablab AMF- R+	5	3	85.2	98.3	120.3
Mucuna AMF+ R-	1	3	99.2	112	123.6
Mucuna AMF+ R-	2	3	98.6	113.2	124
Mucuna AMF+ R-	3	3	98.5	111.6	123.2
Mucuna AMF+ R-	4	3	99.1	118.2	120.5
Mucuna AMF+ R-	5	3	98.7	116.3	125
Cowpea AMF- R+	1	3	37	44	68.2
Cowpea AMF- R+	2	3	36.2	50	60.3
Cowpea AMF- R+	3	3	36.6	52	60.2
Cowpea AMF- R+	4	3	36.8	52.3	70
Cowpea AMF- R+	5	3	37.1	44.9	70
Lablab AMF+ R-	1	3	96.3	105.3	120.3
Lablab AMF+ R-	2	3	95.7	106	123
Lablab AMF+ R-	3	3	95.8	108.2	119.2
Lablab AMF+ R-	4	3	96.1	104.2	118.2
Lablab AMF+ R-	5	3	96.3	110	120.3
Mucuna AMF- R+	1	3	96.3	111	128.6
Mucuna AMF- R+	2	3	95.2	110	125.3
Mucuna AMF- R+	3	3	95.3	109	122.3
Mucuna AMF- R+	4	3	95	100	129.3
Mucuna AMF- R+	5	3	94.3	106.3	128.2
Cowpea AMF+ R+	1	3	58.3	64	86.3
Cowpea AMF+ R+	2	3	58	68.5	80.2
Cowpea AMF+ R+	3	3	58.4	70	84.3
Cowpea AMF+ R+	4	3	58.3	69.3	83
Cowpea AMF+ R+	5	3	58	68.2	82.1
Lablab AMF- R-	1	3	94.6	112	129.3
Lablab AMF- R-	2	3	94.7	100	132.2
Lablab AMF- R-	3	3	95.2	112.3	128.9
Lablab AMF- R-	4	3	94.8	117	129.3
Lablab AMF- R-	5	3	95.3	120	130.2
Mucuna AMF+ R+	1	3	131.1	145	170.2
Mucuna AMF+ R+	2	3	132	150	170
Mucuna AMF+ R+	3	3	131.5	148.2	168.2
Mucuna AMF+ R+	4	3	131.7	146	173.2
Mucuna AMF+ R+	5	3	132.2	145	172.2
Mucuna AMF+ R+	1	4	145	156	203
Mucuna AMF+ R+	2	4	143.2	156.3	198
Mucuna AMF+ R+	3	4	144.2	152.3	196.3
Mucuna AMF+ R+	4	4	144	150.3	197.2
Mucuna AMF+ R+	5	4	144	154.2	201.3
Cowpea AMF+ R-	1	4	45.2	58.2	86.3
Cowpea AMF+ R-	2	4	44.8	59.3	90.2
Cowpea AMF+ R-	3	4	44.6	57.2	92
Cowpea AMF+ R-	4	4	44.3	56.3	93
Cowpea AMF+ R-	5	4	45	55	86.8
Lablab AMF- R+	1	4	92.3	102	123.2
Lablab AMF- R+	2	4	91.2	110	119.2
Lablab AMF- R+	3	4	92	103.2	118.3
Lablab AMF- R+	4	4	92.3	105.3	120.3
Lablab AMF- R+	5	4	91.6	105	123
Mucuna AMF+ R-	1	4	108.3	120	145.2
Mucuna AMF+ R-	2	4	108.3	118.5	156
Mucuna AMF+ R-	3	4	106	117.2	158.2
Mucuna AMF+ R-	4	4	102.3	115.2	157.2
Mucuna AMF+ R-	5	4	109.5	120.3	153.3
Cowpea AMF- R+	1	4	43.2	56.3	77.6
Cowpea AMF- R+	2	4	44.2	58.2	76.3
Cowpea AMF- R+	3	4	46.3	52.3	75.2
Cowpea AMF- R+	4	4	45	58.3	77.2
Cowpea AMF- R+	5	4	47.2	57.2	77.6
Lablab AMF+ R-	1	4	106.2	120	132.5
Lablab AMF+ R-	2	4	104	118.2	136.2
Lablab AMF+ R-	3	4	105	114.3	140.3
Lablab AMF+ R-	4	4	104.3	114.5	132.2
Lablab AMF+ R-	5	4	105	119.2	130.5
Mucuna AMF- R+	1	4	103.5	120.3	143
Mucuna AMF- R+	2	4	104	120	142.3
Mucuna AMF- R+	3	4	106	116.3	140.2
Mucuna AMF- R+	4	4	104	114	139.6
Mucuna AMF- R+	5	4	103.5	114.3	140.3
Cowpea AMF- R-	1	4	33.5	46	60.3
Cowpea AMF- R-	2	4	36	45.3	60.2
Cowpea AMF- R-	3	4	35.2	44.3	63.2
Cowpea AMF- R-	4	4	34.2	46.2	62.3
Cowpea AMF- R-	5	4	34.3	48	60.5
Lablab AMF+ R+	1	4	119.8	136	165.3
Lablab AMF+ R+	2	4	120.3	135	170.2
Lablab AMF+ R+	3	4	121	132	169.3
Lablab AMF+ R+	4	4	120	132	162.3
Lablab AMF+ R+	5	4	120.3	136.3	160.3
Mucuna AMF- R-	1	4	99.3	106	123.2
Mucuna AMF- R-	2	4	98.2	103.2	120.3
Mucuna AMF- R-	3	4	99.2	110	119.6
Mucuna AMF- R-	4	4	99.2	105.2	123.6
Mucuna AMF- R-	5	4	98.6	103.2	125.2
Cowpea AMF+ R+	1	4	62.3	74	96.3
Cowpea AMF+ R+	2	4	61.3	73	98.6
Cowpea AMF+ R+	3	4	62	72	94.5
Cowpea AMF+ R+	4	4	61.8	73	92.3
Cowpea AMF+ R+	5	4	62.1	76	90.3
Lablab AMF- R-	1	4	99.6	110	132.2
Lablab AMF- R-	2	4	98	102.3	129.5
Lablab AMF- R-	3	4	98	105	126.3
Lablab AMF- R-	4	4	98.5	103.2	130.2
Lablab AMF- R-	5	4	97.6	105.3	129.6
